# Supplementary material for: Genome-Wide Identification of Superoxide Dismutase and Expression in Response to Fruit Development and Biological Stress in Akebia trifoliata: A Bioinformatics Study
Source: Antioxidants (Basel). 2023 Mar 15;12(3):726. doi: 10.3390/antiox12030726 (PMC10045841; doi:10.3390/antiox12030726)
Supplement: Supplementary file 1 [file antioxidants-12-00726-s001.zip › supplementary tables.xlsx]

## Sheet: Table S1
Table S1. SODs sequences in four different evolutionary nodes species
Gene ID	Gene name	species	Seq
EVM0009170.2	AktCSD1	Akebia trifoliata	MVKAVVVLNSKEGVSGTIYFTQEGDGPTTVNGSLSGLKPGLHGFHVHALGDTTNGCMSTGPHYNPASKEHGAPEDENRHAGDLGNVSVGEDGTVSFTIVDKQIPLTGPNAIIGRAVVVHADPDDLGKGGHELSKSTGNAGGRVACGVIGLQG
EVM0011294.1	AktCSD2	Akebia trifoliata	MAAIGSVKAVVLIAGDKNNIRGSLQFLQDPNGVTHVKGKITGLSPGLHAFHIHALGDTTNGCNSTGPHFNPLKKDHGAPFDRERHAGDLGNILAGPDGVAEVFIKDRQIPLSGQHSILGRAVVVHADPDDLGRGEHELSKTTGNAGARIGCGIIGLQSSV
EVM0015107.1	AktCSD3	Akebia trifoliata	MAMDSSSGQLDLGSQITMVKAVAVLNSTEGVSGTIYFTQEGHEPTTVTGCISGLKPGNHGFHVHALGDTTNGCMSTGPHFNPAGNEHGAPEDENRHAGDLGNITAGEDGTVNISIVDKQIPLTGTHSIIGRAVVVHGDPDDLGKGGHELSKTTGNAGGRIACGIIGLQG
EVM0004711.1	AktCSD4	Akebia trifoliata	MAAMAAHTILSASPSQTLLSSSFSNPNSHSLHSSFFGFSIKFPTQPLKLSSSSKSLTIFAATKKAVAVLKGNSKVEGVVTLSQEDNGPTTVNVRITGLVPGPHGFHLHEYGDTTNGCISTGAHFNPNGKTHGAPEDEIRHAGDLGNIVANADGVAEATIVDNQIPLSGTNAVIGRALVVHELVDDLGKGGHELSLTTGNAGGRLACGVVGLTPV
EVM0014685.1	AktCSD5	Akebia trifoliata	MAFLRSITTTAVSVLPATVLTISALSSSQSPNPSLFKPPNLHSLSSSIFKSDRLSFCRNFNPSHSSLRMDSLSSELKHSPQKDGGFPELLKDVGLPELMTEFMVDMKCDGCVNAVKNKLLTVDGVKEVEVDLSNQVVRVHGSSPVKAMADALEQTGRKARLIGQGNRDDFLVSAAVSEFKGPNIFGVVRLAQVNMELATIEASFSGLSPGKHGWSINEFGDLTKGAASTGNVFNPTNQVNEEPLGDLGTLDAQENGEAFFSGVKQMLRVVDLIGRSIVVYETEDKSDSGIAAAVIARSAGVGENYKKICTCDGTTIWESSNVDFAVSKV
EVM0003060.2	AktCSD6	Akebia trifoliata	MQAVVLAAMAAQTVLFASASQPFFTSSLPHPKPTLQSSFHGSSLKFPRQSLKLAISPKSLTIFSATKKAVAVLKGNSKVEGVVTLTQEDDGPTSVNVRITGLTPGPHGFHLHEYGDTTNGCISTGAHFNPNGMTHGAPDDEVRHAGDLGNIVANADGVAEATIVDKQIPLSGPNAVVGRALVVHELVDDLGKGGHELSLTTGNAGGRLACDLRAFLNFCQLLR
EVM0005862.1	AktCSD7	Akebia trifoliata	MPPTVLSRLLRPTIVSRIVSSLKPGLHGFHVHSFGDTTNGCISTDENRHVGDLGNLTPSEDGLHSFFIPLFGPHSIVGRAIVVHADPNDLGRGGHELSKTTGNAGDRVACDPISTFEILGLG
EVM0017725.1	AktFSD1	Akebia trifoliata	MTSVRFKWHFFSDFMFEPRSWDYQLKLSWHPYTWKQPIIWLHHGGLVKVTYNNGNPLPEFNNAAQVWNHDFFWESMQPGGAKIPGEGVIQQIEKDFGSFTNFREKFVEAALTLFGSGWIWLVLKTREKRLAVVKTSNAFNPLVWDDIPIIGLDMWEHAYYLDYKNDKGQYVNAFMNHLVSWHTVTARMARAEAFVNFGEPKVPVA
EVM0016720.1	AktFSD2	Akebia trifoliata	MQATTTAISLTCALFPCQGTRGSLISSTHRQRWRKPKACRTLITAQFQLKPPPYPLNSLEPHMSLETLEYHWGKHHRGYVENLNKQILGTELDGMTLEDTLIVTYNRGDPLPAFNNAAQIWNHDFFWESMKPSGGGMPSGELLELIERDFGSYEGFMREFKIAASTQFGSGWAWLAYKANRLDVGNAVNPCPSEEDKKLVMVKSPNAVNPLVWDYSPLLTIDIWEHAYYLDYQNRRVDYISMFMENLISWDAVSSRLEMAKARVVEREREEERRKEEEEKMDEIEAVEMYLDSESEDSEAE
EVM0002565.1	AktMSD1	Akebia trifoliata	MDSTHTHPLLCVMSSFLPSKMLQDWQVVPAGIETELLVGDSSLNVIAIKASLHLPFDHLLVQNLTTQKHHQTYVTNYNKALEQLEKAMLKGDSSTVVKLQSAIKFNGRGGGGPPKGALGWVVDQHFGSLEALVQKINAEGAALQGSGWVWLGLDKEMKKLVVEATKKSVIG
EVM0008804.1	AktMSD2	Akebia trifoliata	MIHFQKHHQTYLTNYNKALEQLEKAMLKGDSSTVVKLQSAIKFNGRGGGGPPKGALGWVVDQHFGYLNSLVQKINAEGAALQGSGWVWLGLDKEMKKPVVEATKKLDPLMTKGSNLVPTGSTGSFFFESLHARTRGCCGPWRYKSCN
EVM0020914.1	AktMSD3	Akebia trifoliata	MIHFQKHHQTYVTNYNKALEQLEKAMLKGDSSTVEGGGGPPKGALGWVVDQHFDSLEALVQKINVGAALQGSGWVWLGLDKEMKKLVVEATKKSEALQSTIPISSIVTKELFSSIFLRKDDAACPAKDFYTYNSFIRATSCFPTFGTTDFHNNLAFGK
EVM0011812.1	AktMSD4	Akebia trifoliata	MALRTIINRKTLELGLGLQKEARNLGIGFRHARELQTVSLPDLPYDYGALEPAISGEIMQLHHQKHHQAYITNYNKALEQLEEAIAKGDSSTVVKLQSAIKFNGGGHINHSIFWKNLTPIREGGGEPPKSSLGWAIDMHFGSLDALVEKINAEGAALQGSGWVWLGLDKNTKKLVLETTANQDPLVTKQPTSIPLLGIDVWEHAYYLQYKNVRPDYLKNIWKVINWKYPCEVYEKVCGTVPRN
scaffold00057.130	AmtCSD1	Amborella trichopoda	MVCGACVECLNFKLLAAFDEITYKMVKAVAVLGSKEGVSGTVFFTQEGDGPTTVTGSLSGLQPGPHGFHVHALGDTTNGCMSTGPHFNPVGKEHGAPEDENRHAGDLGNVTVGEDGTANFTIVDSQIPLSGPNSIIGRAVVVHADPDDLGKGGHELSKTTGNAGGRVACGIIGLQG
scaffold00102.33	AmtCSD2	Amborella trichopoda	MQALLAAMAAHTVFAASTWHSPALVSLSSPVTLHSYFRGASLKVSNQSFTLSPAAISRRLTIVAATKKAVAVLKGNSQVEGVVTLTQEDDGPTTVNVRITGLTPGKHGFHLHEFGDTTNGCMSTGAHFNPKKLTHGAPEDEIRHAGDLGNIVANADGVAEATIVDNQIPLSGSNAVIGRAFVVHELEDDLGKGGHELSLTTGNAGGRLACGVVGLTPV
scaffold00068.39	AmtCSD3	Amborella trichopoda	MASPTLKAVAIISGDPNVKGSLLFIQYPNGATHVKGKIAGLSPGLHGFHVHAFGDTTNGCMSTGPHYNPWKKDHGAPTDEERHAGDLGNIYAGHDGVAEVSLKNSQIPLSGPNSIVGRAVVVHADPDDLGRGGHELSKATGNAGGRVGCGVIGLQSSV
scaffold00069.176	AmtCSD4	Amborella trichopoda	MYPNFMTEFMVDMKCDGCVSAVQNKLQTLDGVKRVDTDLPNQVVRVLGAIPIKTMLDALEQTGRKARLIGQGNPEDFLVSAAVAEFKGPDIFGVVRLAQVNMELARIEANFSGLSPGLHAWSINEYGDLTEGPASTGKIFNVGRTSEEPIGDLGTLEASKAGEAYFSGVKKMLCVNDLIGRSIVVYGSENKSDTGIAAAVIARSAGVGENYKKICACDGTIIWESSDADFETQVKA
scaffold00002.85	AmtFSD1	Amborella trichopoda	MSMVFATGKYLKITHRSSIVAQFELKPPPYPLVALEPHLSRQTLEHHWGKHQKGYVENLNQQILGTELDGMGLEDIILASYNKGDPLPAFNNAAQIWNHEFFWESMKPGGGGKPSGDLLHLIERDFGSFKDFLREFVDTASAHCGSGWVWITYKANKLNVDNAVNPRPSENDYKIVVARTPNAVNPLVWDYSPLLTIDVWEHAYYLDYENRRAKYVSTIMEKLVAWDVVSSRLEVAKSRAAERAREEEERKRREEEFESEEEIDESEMFLNSDPEESEAE
scaffold00044.9	AmtFSD2	Amborella trichopoda	MAMASQLLLLPNLRFHSNSQSAPRVISNPICRPLKLSKFQKRYKQSLRDSRVLAFYGRKTPPYKLDALEPYMSQRTLEVHWGKHHQEYVDGLNKQLENSPLYGHTLEELVKVTYNNGNPMPEFNNAAQLWNHDFFWESMQPDGGKSPWGGVLQQIEKDFGSLEKFRDEFVEAALSLFGSGWVWLVLKTKEKKFAVMKTSNAVNPLVGGEIPIIGLDMWEHAYYLDYKDDREKYVMTFLNHLVSWHTVALRMIRAEAFVNLGEPKIPVA
scaffold00077.26	AmtMSD1	Amborella trichopoda	MALRILFKKPCFPIPSHYGSTVPLRQFKTFSLPELPYDYGALEPAINGEIMQLHHQKHHQAYVTNFNNALELLDQALAKGDASSTVQLQSAIKFNGGGHINHSIFWKNLAPVNEGGGEPPKGPLGLAVEEHFGSLEELIKKMNVQGAALQGSGWVWLALDKETKTLSVETTANQDPLVTKGASLVPLLGIDVWEHAYYLQILPVD
AC-Aqcoe2G315500.1.v3.1	AqcCSD1	Aquilegia coerulea	MNFHFKLVSLSWFFHLGFLLSVQSSSVAQNCKTHKTMMKAVAVLTSNEGVSGTVSFTQEGNGPTTVRAHISGLKPGLHGFHVHQFGDMTNGCTSAGPHFNPANKEHGAPEDENRHAGDLGNVRATDDGAVDFTITDKQIPLTGPNSIVGRTIVVHTDPDDLGKGGHELSKSTGNAGGRIACGVIGLQE
AC-Aqcoe5G074000.1.v3.1	AqcCSD2	Aquilegia coerulea	MVKGVAVLNSKDGVSGTVYFTQEGDGPTTVTGNLSGLKAGLHGFHVHALGDTTNGCMSTGPHYNPAGKEHGAPEDEIRHAGDLGNVTAGDDGTVTLNIVDSQIPLTGPNSIIGRAVVVHADPDDLGKGGHELSKSTGNAGGRIACGIIGLQG
AC-Aqcoe2G057000.1.v3.1	AqcCSD3	Aquilegia coerulea	MATASSTTSTTTIKAVAVINGANDVKGSLQFLQLPNGFTQVKGKITGLSPGLHGFHIHALGDTTNGCNSTGPHFNPLKKNHGDPLSQERHAGDLGNIIAGPNGIAEVSVMDTQIPLSGQHSILGRAVVVHADPDDLGRGGHELSKTTGNAGARIGCGIIGLQSSV
AC-Aqcoe2G212500.1.v3.1	AqcCSD4	Aquilegia coerulea	MQAAVLAVMAAQTILTASSSSQLVISASFPNSSNTPQSLHSSSIIGYSLKFPRQSLKLSTTATTSPKSFTVFAAAKKAVAVLKGNSQVEGVVTLTQEDDGPTSVNVRVTGLTPGPHGFHLHQYGDTTNGCISTGPHFNPNGMTHGAPEDEIRHAGDLGNIVANAEGVAEATIVDNQIPLSGPNAVVGRAFVVHELADDLGKGGHELSLSTGNAGGRLACGVVGLTPV
AC-Aqcoe4G193200.1.v3.1	AqcCSD5	Aquilegia coerulea	MLKGGAVLNNKDGVSGTVYFTQERDAGLHGFHVHALGNTTNGCMSTGPHYNPAGKEHGAPEDEIRHAGDLKIVTVGNDDYSRIGRAVVVHADPGDLGKDNLLYYSLLCKFFQ
AC-Aqcoe7G057100.1.v3.1	AqcCSD6	Aquilegia coerulea	MAFFRTLTTTTVAAAAIVPAALTITSTNSSFFKTPNRFLSLSSTSIFSLSRNFTPPRTSLQMDSVTSTTSPTAQKDIILPELMTEFMVDMTCEGCVNAVKNKLQTVDGVKGVEVDLSNQVVRVLGSSPVKTMADALEQTGRKARLIGQGNPEDFSVSAAVSEFKGPDVFGVVRLAQVNMELARVEASFSGLSPGKHGWSINEFGDLTKGAASTGKVFNPSNQGTEEPLGDLGTLDAQENGEAFFSGVKPMLRVVDLIGRSIVLYETQDRSDPGIAAAVIARSAGVGENYKKLCTCDGTTIWESNNTDFTVSKV
AC-Aqcoe6G282700.1.v3.1	AqcCSD7	Aquilegia coerulea	MVKGGAVLNKDGVSGTVYFTPRKRWYNFETTSGLHGFHVHALGNTTNGCMSTGPHYNPAGKEHGASEDEIRHACWLIPLTGLNSSIGSAAVVHADPGGLGKDNLLYYSLLCKFFQ
AC-Aqcoe4G169900.1.v3.1	AqcCSD8	Aquilegia coerulea	MMIPLTGLNSSIGRAVVVHADPGGLGKDNLLYYSLLCKFFQ
AC-Aqcoe3G264600.1.v3.1	AqcFSD1	Aquilegia coerulea	MMTSLMSLMKEDDDQIEKRGERVMKMIASTMMSFRNSKESKCICCIALAFESTERMHTSSLTCALIPFQGFLGSLESSSHSCLQWRNPKRTCSQKASKPYITAQLELKPPPYPLNSLEPHMSRETLEYHWGKHHRGYVETLNKQIIGTELDGMALEDIIILTYNRGDPFPAFNSAAQIWNHDFFWESMKPGGGGKPTGNLLQLIERDFGSYKEFVKEFKLAASTQFGSGWAWLAYKANRLDVGNSINPRPSEEDKKLVIVKTPNAVNPLVWDYSPLLTIDVWEHAYYIDYQNRRADYISTFMEKCVSWEMVSLRLEMAKARAIEREKEEEIEEDGENNSNNEPREMYVDSESEGSDIE
AC-Aqcoe3G009400.1.v3.1	AqcFSD2	Aquilegia coerulea	MGFCCCSISISSNRCFSTNANANANVSVSHLSNHKRFNLVTLPLTKPKSFRIQRLPKVFAFYGLTDPPYKLDALEPYMSQRTLELHWGQHHRNYVEGLNKQLLLNNNPLYGCTMEELVKLTYNNGNPLPEFNNAAQVWNHDFFWESMQPGGGSIPGEGVMKQMEKDFGSFTNFKEKFTEAAQTLFGSGWIWLVLKPREKRLAVVKTSNAVTPLIWDDIPIISLDMWEHAYYTDYKNDKGKYVNVFMNNLVSWHAATTRMARAEAFVNLGEPNIPVA
AC-Aqcoe2G075100.1.v3.1	AqcMSD1	Aquilegia coerulea	MALRNLIKQKTNLLGRGLGLGFNHRGLQTVSLPDLAYDYGALEPAISGEIMKIHHQKHHQAYITNYNKALEQLDDAINKGDASNVVKLQSAIKFNGGGHVNHSIFWKNLTPVSEGGGEPPKGSLGEAINAHFCSLEALVQKVNSEGAALQGSGWVWLALDKDAKKLVVETTTNQDPLVTKGPTLVPLLGIDVWEHAYYLQYKNVRPDYLKNIWKVINWKYASEVYEKECP
AT1G08830.1	AtCSD1	Arabidopsis thaliana	MAKGVAVLNSSEGVTGTIFFTQEGDGVTTVSGTVSGLKPGLHGFHVHALGDTTNGCMSTGPHFNPDGKTHGAPEDANRHAGDLGNITVGDDGTATFTITDCQIPLTGPNSIVGRAVVVHADPDDLGKGGHELSLATGNAGGRVACGIIGLQG
AT2G28190.1	AtCSD2	Arabidopsis thaliana	MAATNTILAFSSPSRLLIPPSSNPSTLRSSFRGVSLNNNNLHRLQSVSFAVKAPSKALTVVSAAKKAVAVLKGTSDVEGVVTLTQDDSGPTTVNVRITGLTPGPHGFHLHEFGDTTNGCISTGPHFNPNNMTHGAPEDECRHAGDLGNINANADGVAETTIVDNQIPLTGPNSVVGRAFVVHELKDDLGKGGHELSLTTGNAGGRLACGVIGLTPL
AT5G18100.1	AtCSD3	Arabidopsis thaliana	MEAPRGNLRAVALIAGDNNVRGCLQFVQDISGTTHVTGKISGLSPGFHGFHIHSFGDTTNGCISTGPHFNPLNRVHGPPNEEERHAGDLGNILAGSNGVAEILIKDKHIPLSGQYSILGRAVVVHADPDDLGKGGHKLSKSTGNAGSRVGCGIIGLQSSADAKL
AT1G12520.3	AtCSD4	Arabidopsis thaliana	MTQALEQTGRKARLIGQGVPQDFLVSAAVAEFKGPDIFGVVRFAQVSMELARIEANFTGLSPGTHSWCINEYGDLTNGAASTGSLYNPFQDQTGTEPLGDLGTLEADKNGEAFYSGKKEKLKVADLIGRAVVVYKTDDNKSGPGLTAAVIARSAGVGENYKKLCSCDGTVIWEATNSDFVASKV
AT5G51100.3	AtFSD1	Arabidopsis thaliana	MMNVAVTATPSSLLYSPLLLPSQGPNRRMQWKRNGKRRLGTKVAVSGVITAGFELKPPPYPLDALEPHMSRETLDYHWGKHHKTYVENLNKQILGTDLDALSLEEVVLLSYNKGNMLPAFNNAAQAWNHEFFWESIQPGGGGKPTGELLRLIERDFGSFEEFLERFKSAAASNFGSGWTWLAYKANRLDVANAVNPLPKEEDKKLVIVKTPNAVNPLVWDYSVSDLTFNI
AT4G25100.1	AtFSD2	Arabidopsis thaliana	MAASSAVTANYVLKPPPFALDALEPHMSKQTLEFHWGKHHRAYVDNLKKQVLGTELEGKPLEHIIHSTYNNGDLLPAFNNAAQAWNHEFFWESMKPGGGGKPSGELLALLERDFTSYEKFYEEFNAAAATQFGAGWAWLAYSNEKLKVVKTPNAVNPLVLGSFPLLTIDVWEHAYYLDFQNRRPDYIKTFMTNLVSWEAVSARLEAAKAASA
AT5G23310.1	AtFSD3	Arabidopsis thaliana	MSSCVVTTSCFYTISDSSIRLKSPKLLNLSNQQRRRSLRSRGGLKVEAYYGLKTPPYPLDALEPYMSRRTLEVHWGKHHRGYVDNLNKQLGKDDRLYGYTMEELIKATYNNGNPLPEFNNAAQVYNHDFFWESMQPGGGDTPQKGVLEQIDKDFGSFTNFREKFTNAALTQFGSGWVWLVLKREERRLEVVKTSNAINPLVWDDIPIICVDVWEHSYYLDYKNDRAKYINTFLNHLVSWNAAMSRMARAEAFVNLGEPNIPIA
AT3G10920.2	AtMSD1	Arabidopsis thaliana	MAIRCVASRKTLAGLKETSSRLLRIRGIQTFTLPDLPYDYGALEPAISGEIMQIHHQKHHQAYVTNYNNALEQLDQAVNKGDASTVVKLQSAIKFNGGGHVNHSIFWKNLAPSSEGGGEPPKGSLGSAIDAHFGSLEGLVKKMSAEGAAVQGSGWWLGLDKELKKLVVDTTANQDPLVTKGGSLVPLVGIDVWEHAYYLQYKNVRPEYLKNVWKVINWKYASEVYEKENN
AT3G56350.1	AtMSD2	Arabidopsis thaliana	MTTTVIIIIFVAIFATTLHDARGATMEPCLESMKTASLPDLPYAYDALEPAISEEIMRLHHQKHHQTYVTQYNKALNSLRSAMADGDHSSVVKLQSLIKFNGGGHVNHAIFWKNLAPVHEGGGKPPHDPLASAIDAHFGSLEGLIQKMNAEGAAVQGSGWVWFGLDRELKRLVVETTANQDPLVTKGSHLVPLIGIDVWEHAYYPQYKNARAEYLKNIWTVINWKYAADVFEKHTRDLDIN
Os03t0351500-01	OsCSD1	Oryza sativa	MVKAVVVLGSSEIVKGTIHFVQEGDGPTTVTGSVSGLKPGLHGFHIHALGDTTNGCMSTGPHYNPAGKEHGAPEDETRHAGDLGNVTAGEDGVANIHVVDSQIPLTGPNSIIGRAVVVHADPDDLGKGGHELSKTTGNAGGRVACGIIGLQG
Os07t0665200-01	OsCSD2	Oryza sativa	TMVKAVAVLASSEGVKGTIFFSQEGDGPTSVTGSVSGLKPGLHGFHVHALGDTTNGCMSTGPHFNPTGKEHGAPQDENRHAGDLGNITAGADGVANVNVSDSQIPLTGAHSIIGRAVVVHADPDDLGKGGHELSKTTGNAGGRVACGIIGLQG
Os08t0561700-01	OsCSD3	Oryza sativa	MQAILAAAMAAQTLLFSATAPPASLFQSPSSARPFHSLRLAAGPAGAAAARALVVADATKKAVAVLKGTSQVEGVVTLTQDDQGPTTVNVRVTGLTPGLHGFHLHEFGDTTNGCISTGPHFNPNNLTHGAPEDEVRHAGDLGNIVANAEGVAEATIVDKQIPLSGPNSVVGRAFVVHELEDDLGKGGHELSLSTGNAGGRLACGVVGLTPL
Os03t0219200-01	OsCSD4	Oryza sativa	GKAGGLKGVALIGGAGGNSAVAGALHFFQDPSTGYTEVRGRVTGLAPGLHGFHIHSFGDTTNGCNSTGPHFNPHNKSHGAPSDDERHVGDLGNIVANKDGVADIFIKDLQISLSGPHSILGRAVVVHADSDDLGRGGHELSKTTGNAGARIGCGIIGLRSAV
Os04t0573200-03	OsCSD5	Oryza sativa	AVKNKFQTLEGIKNIEVDLNNQVVRVLGSLPVNTMLDTLHQTGRDARLIGQGNPNDFLVSAAVAEFKGPVIFGVVRLAQVNMELAIVEATFSGLSPGKHGWSINEFGDLTRGAESTGKVYNPSDYRSNKPLGDLGTLEAGEKGEAQFSASKEKLKVVDLIGRSIALYATEDRSDPGIAAAVIARSAGVGENYKKLCTCDGVTIWESS
Os04t0573200-02	OsCSD6	Oryza sativa	LRALTAASAVPAAAAVAAVALSTNSSSSSRLRLPSPASLPSLSSAYAAAPASGSARKPNAVPPMAAAAATADLSAAADKGAALPELMTEFMVDMKCDGCVTAVKNKFQTLEGIKNIEVDLNNQVVRVLGSLPVNTMLDTLHQTGRDARLIGQGNPNDFLVSAAVAEFKGPVIFGVVRLAQVNMELAIVEATFSGLSPGKHGWSINEFGDLTRGAESTGKVYNPSDYRSNKPLGDLGTLEAGEKGEAQFSASKEKLKVVDLIGRSIALYATEDRSDPGIAAAVIARSAGVGENYKKLCTCDGVTIWESS
Os04t0573200-01	OsCSD7	Oryza sativa	MVGFLRALTAASAVPAAAAVAAVALSTNSSSSSRLRLPSPASLPSLSSAYAAAPASGSARKPNAVPPMAAAAATADLSAAADKGAALPELMTEFMVDMKCDGCVTAVKNKFQTLEGIKNIEVDLNNQVVRVLGSLPVNTMLDTLHQTGRDARLIGQGNPNDFLVSAAVAEFKGPVIFGVVRLAQVNMELAIVEATFSGLSPGKHGWSINEFGDLTRGAESTGKVYNPSDYRSNKPLGDLGTLEAGEKGEAQFSASKEKLKVVDLIGRSIALYATEDRSDPGIAAAVIARSAGVGENYKKLCTCDGVTIWESS
Os06t0143000-01	OsFSD1	Oryza sativa	MAAFASALRVLPSPPAAVPRRLRSREQRQGCRSRRYSKVVAYYALTTPPYKLDALEPYISKRTVELHWGKHQQDYVDSLNKQLATSMFYGYTLEELIKEAYNNGNPLPEYNNAAQVWNHHFFWESMQPEGGGSPGRGVLQQIEKDFGSFTNFREEFIRSALSLLGSGWVWLVLKRKERKFSVVHTQNAISPLALGDIPLINLDLWEHAYYLDYKDDRRMYVTNFIDHLVSWDTVTLRMMRAEAFVNLGEPNIPVA
Os06t0115400-01	OsFSD2	Oryza sativa	MAFATLVGVGGLSPALFSPSRPLSCSSSTSVSAPFILRAGGGGDARRHGLRRLVTPLRGSACRGESTNSRVLQCANEANVVTEDDIVNDGIDDETASDAEMDEDAEANGDESSGTDEDASVSWIEQQPLPYPSDALEPYISKETVEQHWGVHQNIHVERLNGMIGGSEWEGMSLGQMMLSSFNEGREAPHPPFFHAAQIWNHDFYWRSMQPGGGGKPPERLLKFINRDFGSYDGMIRQFMDAASTQFGSGWVWLCYKTSKLPHVKSRSPIPSDNYGRLVISKSPNAINPLVWGHSPLLAIDLWEHAYYLDYEDRRSDYVSTFLEKLVSWETVESRLKKAVQRAVERDEYVSTKHIRKQLLARAKSQIRAMPQQVNGDAREQTSGQEKSLGV
Os06t0115400-02	OsFSD3	Oryza sativa	MDEDAEANGDESSGTDEDASVSWIEQQPLPYPSDALEPYISKETVEQHWGVHQNIHVERLNGMIGGSEWEGMSLGQMMLSSFNEGREAPHPPFFHAAQVSFRMLSCMSSI
Os05t0323900-01	OsMSD1	Oryza sativa	MALRTLASRKTLAAAALPLAAAAAARGVTTVALPDLPYDYGALEPAISGEIMRLHHQKHHATYVANYNKALEQLDAAVAKGDAPAIVHLQSAIKFNGGGHVNHSIFWNNLKPISEGGGDPPHAKLGWAIDEDFGSFEALVKKMSAEGAALQGSGWVWLALDKEAKKLSVETTANQDPLVTKGANLVPLLGIDVWEHAYYLQYKNVRPDYLSNIWKVMNWKYAGEVYENATA

## Sheet: Table S2
Table S2. The information of identified 10 motifs in AktSOD proteins.
Motif name	Motif sequence	width	p-value
Motif1	IVDKQIPLSGPHAIIGRAVVVHADPDDLGKGGHELSKTTGNAGGRIAC	48	9.9e-128
Motif2	LKPGPHGFHVHALGDTTNGCISTGPHFNPAGKEHGAPEDENRHAGDLGNI	50	1.8e-114
Motif3	HFQKHHQTYVTNYNKALEQLEKAMLKGDSSTVVKLQSAIKF	41	3.4e-71
Motif4	NAEGAALQGSGWVWLGLDKEMKKLVVEAT	29	3.7e-50
Motif5	VWDDIPLLGIDIWEHAYYLDYKNDRPDY	28	1.1e-28
Motif6	KAVAVLKGNEGVEGVIYFTQEGDGPTTVN	29	9.1e-29
Motif7	RGGGGPPKAALGWVVDFHFGSLEPLVZKI	29	2.3e-31
Motif8	FPCRGWDGQLKLSWHRQRWKKPKIW	25	1.8e-07
Motif9	QSSFFGFSJKFPRQPLKLAISPKSLTIFAATK	32	4.1e-07
Motif10	QIEKDFGSYEGFIREF	16	1.1e-09

## Sheet: Table S3
Table S3. Detailed information of cis-acting elements in the 2000bp region of the SOD gene coding region																	Three fruit tissues					Developmental period					Error
Gene ID	cis-acting elements	sequence	start site	length	strand	species	annotation	type
EVM0002565.1	MRE	AACCTAA	118	7	-	Petroselinum crispum	MYB binding site involved in light responsiveness	light responsiveness
EVM0002565.1	ABRE	ACGTG	989	5	+	Arabidopsis thaliana	abscisic acid responsiveness	abscisic acid responsiveness
EVM0003060.2	ABRE	ACGTG	463	5	+	Arabidopsis thaliana	abscisic acid responsiveness	abscisic acid responsiveness
EVM0004711.1	ABRE	TACGGTC	4	7	+	Arabidopsis thaliana	abscisic acid responsiveness	abscisic acid responsiveness
EVM0004711.1	ABRE	ACGTG	1558	5	+	Arabidopsis thaliana	abscisic acid responsiveness	abscisic acid responsiveness
EVM0004711.1	ABRE	ACGTG	1804	5	-	Arabidopsis thaliana	abscisic acid responsiveness	abscisic acid responsiveness
EVM0004711.1	ABRE	ACGTG	1883	5	-	Arabidopsis thaliana	abscisic acid responsiveness	abscisic acid responsiveness
EVM0004711.1	ABRE	CACGTG	1895	6	-	Arabidopsis thaliana	abscisic acid responsiveness	abscisic acid responsiveness
EVM0005862.1	ABRE	TACGTGTC	1339	8	-	Oryza sativa	abscisic acid responsiveness	abscisic acid responsiveness
EVM0005862.1	ABRE	ACGTG	1341	5	-	Arabidopsis thaliana	abscisic acid responsiveness	abscisic acid responsiveness
EVM0005862.1	ABRE	ACGTG	1846	5	+	Arabidopsis thaliana	abscisic acid responsiveness	abscisic acid responsiveness
EVM0008804.1	ABRE	ACGTG	241	5	+	Arabidopsis thaliana	abscisic acid responsiveness	abscisic acid responsiveness
EVM0009170.2	ABRE	ACGTG	455	5	+	Arabidopsis thaliana	abscisic acid responsiveness	abscisic acid responsiveness
EVM0009170.2	ABRE	ACGTG	1354	5	+	Arabidopsis thaliana	abscisic acid responsiveness	abscisic acid responsiveness
EVM0009170.2	ABRE	ACGTG	1433	5	-	Arabidopsis thaliana	abscisic acid responsiveness	abscisic acid responsiveness
EVM0009170.2	ABRE	ACGTG	1748	5	-	Arabidopsis thaliana	abscisic acid responsiveness	abscisic acid responsiveness
EVM0009170.2	ABRE	ACGTG	1844	5	-	Arabidopsis thaliana	abscisic acid responsiveness	abscisic acid responsiveness
EVM0011294.1	ABRE	ACGTG	184	5	-	Arabidopsis thaliana	abscisic acid responsiveness	abscisic acid responsiveness
EVM0011812.1	ABRE	ACGTG	535	5	-	Arabidopsis thaliana	abscisic acid responsiveness	abscisic acid responsiveness
EVM0011812.1	ABRE	ACGTG	544	5	-	Arabidopsis thaliana	abscisic acid responsiveness	abscisic acid responsiveness
EVM0011812.1	ABRE	CACGTG	1638	6	-	Arabidopsis thaliana	abscisic acid responsiveness	abscisic acid responsiveness
EVM0011812.1	ABRE	ACGTG	1639	5	+	Arabidopsis thaliana	abscisic acid responsiveness	abscisic acid responsiveness
EVM0011812.1	ABRE	CACGTG	1788	6	-	Arabidopsis thaliana	abscisic acid responsiveness	abscisic acid responsiveness
EVM0011812.1	ABRE	ACGTG	1789	5	+	Arabidopsis thaliana	abscisic acid responsiveness	abscisic acid responsiveness
EVM0017725.1	ABRE	ACGTG	568	5	+	Arabidopsis thaliana	abscisic acid responsiveness	abscisic acid responsiveness
EVM0002565.1	ARE	AAACCA	850	6	-	Zea mays	cis-acting regulatory element essential for the anaerobic induction	anaerobic induction
EVM0002565.1	ARE	AAACCA	1546	6	+	Zea mays	cis-acting regulatory element essential for the anaerobic induction	anaerobic induction
EVM0003060.2	ARE	AAACCA	55	6	+	Zea mays	cis-acting regulatory element essential for the anaerobic induction	anaerobic induction
EVM0003060.2	ARE	AAACCA	480	6	-	Zea mays	cis-acting regulatory element essential for the anaerobic induction	anaerobic induction
EVM0003060.2	ARE	AAACCA	553	6	-	Zea mays	cis-acting regulatory element essential for the anaerobic induction	anaerobic induction
EVM0003060.2	ARE	AAACCA	627	6	-	Zea mays	cis-acting regulatory element essential for the anaerobic induction	anaerobic induction
EVM0003060.2	ARE	AAACCA	774	6	+	Zea mays	cis-acting regulatory element essential for the anaerobic induction	anaerobic induction
EVM0003060.2	ARE	AAACCA	1357	6	+	Zea mays	cis-acting regulatory element essential for the anaerobic induction	anaerobic induction
EVM0003060.2	ARE	AAACCA	1602	6	-	Zea mays	cis-acting regulatory element essential for the anaerobic induction	anaerobic induction
EVM0003060.2	ARE	AAACCA	1656	6	+	Zea mays	cis-acting regulatory element essential for the anaerobic induction	anaerobic induction
EVM0003060.2	ARE	AAACCA	1865	6	+	Zea mays	cis-acting regulatory element essential for the anaerobic induction	anaerobic induction
EVM0004711.1	ARE	AAACCA	382	6	-	Zea mays	cis-acting regulatory element essential for the anaerobic induction	anaerobic induction
EVM0005862.1	ARE	AAACCA	640	6	+	Zea mays	cis-acting regulatory element essential for the anaerobic induction	anaerobic induction
EVM0005862.1	ARE	AAACCA	1134	6	-	Zea mays	cis-acting regulatory element essential for the anaerobic induction	anaerobic induction
EVM0008804.1	ARE	AAACCA	1574	6	+	Zea mays	cis-acting regulatory element essential for the anaerobic induction	anaerobic induction
EVM0008804.1	ARE	AAACCA	1864	6	-	Zea mays	cis-acting regulatory element essential for the anaerobic induction	anaerobic induction
EVM0009170.2	ARE	AAACCA	113	6	-	Zea mays	cis-acting regulatory element essential for the anaerobic induction	anaerobic induction
EVM0009170.2	ARE	AAACCA	393	6	-	Zea mays	cis-acting regulatory element essential for the anaerobic induction	anaerobic induction
EVM0009170.2	ARE	AAACCA	664	6	+	Zea mays	cis-acting regulatory element essential for the anaerobic induction	anaerobic induction
EVM0009170.2	ARE	AAACCA	916	6	-	Zea mays	cis-acting regulatory element essential for the anaerobic induction	anaerobic induction
EVM0009170.2	ARE	AAACCA	1088	6	-	Zea mays	cis-acting regulatory element essential for the anaerobic induction	anaerobic induction
EVM0009170.2	ARE	AAACCA	1523	6	+	Zea mays	cis-acting regulatory element essential for the anaerobic induction	anaerobic induction
EVM0011294.1	ARE	AAACCA	283	6	-	Zea mays	cis-acting regulatory element essential for the anaerobic induction	anaerobic induction
EVM0011294.1	ARE	AAACCA	1719	6	-	Zea mays	cis-acting regulatory element essential for the anaerobic induction	anaerobic induction
EVM0011812.1	ARE	AAACCA	1171	6	-	Zea mays	cis-acting regulatory element essential for the anaerobic induction	anaerobic induction
EVM0011812.1	ARE	AAACCA	1447	6	-	Zea mays	cis-acting regulatory element essential for the anaerobic induction	anaerobic induction
EVM0011812.1	ARE	AAACCA	1537	6	-	Zea mays	cis-acting regulatory element essential for the anaerobic induction	anaerobic induction
EVM0011812.1	ARE	AAACCA	1763	6	-	Zea mays	cis-acting regulatory element essential for the anaerobic induction	anaerobic induction
EVM0014685.1	ARE	AAACCA	173	6	+	Zea mays	cis-acting regulatory element essential for the anaerobic induction	anaerobic induction
EVM0014685.1	ARE	AAACCA	640	6	-	Zea mays	cis-acting regulatory element essential for the anaerobic induction	anaerobic induction
EVM0014685.1	ARE	AAACCA	1016	6	-	Zea mays	cis-acting regulatory element essential for the anaerobic induction	anaerobic induction
EVM0014685.1	ARE	AAACCA	1446	6	-	Zea mays	cis-acting regulatory element essential for the anaerobic induction	anaerobic induction
EVM0014685.1	ARE	AAACCA	1525	6	+	Zea mays	cis-acting regulatory element essential for the anaerobic induction	anaerobic induction
EVM0014685.1	ARE	AAACCA	1841	6	+	Zea mays	cis-acting regulatory element essential for the anaerobic induction	anaerobic induction
EVM0015107.1	ARE	AAACCA	1965	6	-	Zea mays	cis-acting regulatory element essential for the anaerobic induction	anaerobic induction
EVM0016720.1	ARE	AAACCA	285	6	+	Zea mays	cis-acting regulatory element essential for the anaerobic induction	anaerobic induction
EVM0016720.1	ARE	AAACCA	469	6	-	Zea mays	cis-acting regulatory element essential for the anaerobic induction	anaerobic induction
EVM0017725.1	ARE	AAACCA	818	6	+	Zea mays	cis-acting regulatory element essential for the anaerobic induction	anaerobic induction
EVM0017725.1	ARE	AAACCA	1179	6	-	Zea mays	cis-acting regulatory element essential for the anaerobic induction	anaerobic induction
EVM0017725.1	ARE	AAACCA	1416	6	+	Zea mays	cis-acting regulatory element essential for the anaerobic induction	anaerobic induction
EVM0017725.1	ARE	AAACCA	1608	6	+	Zea mays	cis-acting regulatory element essential for the anaerobic induction	anaerobic induction
EVM0017725.1	ARE	AAACCA	1716	6	-	Zea mays	cis-acting regulatory element essential for the anaerobic induction	anaerobic induction
EVM0020914.1	ARE	AAACCA	742	6	-	Zea mays	cis-acting regulatory element essential for the anaerobic induction	anaerobic induction
EVM0020914.1	ARE	AAACCA	1572	6	+	Zea mays	cis-acting regulatory element essential for the anaerobic induction	anaerobic induction
EVM0020914.1	ARE	AAACCA	1864	6	-	Zea mays	cis-acting regulatory element essential for the anaerobic induction	anaerobic induction
EVM0014685.1	GC-motif	CCCCCG	504	6	+	Zea mays	anoxic specific inducibility	anoxic specific inducibility
EVM0017725.1	GC-motif	CCCCCG	447	6	+	Zea mays	anoxic specific inducibility	anoxic specific inducibility
EVM0017725.1	GC-motif	CCCCCG	1572	6	-	Zea mays	anoxic specific inducibility	anoxic specific inducibility
EVM0008804.1	AuxRR-core	GGTCCAT	106	7	+	Nicotiana tabacum	auxin responsiveness	auxin responsiveness
EVM0009170.2	TGA-element	AACGAC	1534	6	+	Brassica oleracea	auxin-responsive element	auxin-responsive element
EVM0011812.1	TGA-element	AACGAC	1508	6	-	Brassica oleracea	auxin-responsive element	auxin-responsive element
EVM0015107.1	TGA-element	AACGAC	344	6	+	Brassica oleracea	auxin-responsive element	auxin-responsive element
EVM0015107.1	TGA-element	AACGAC	987	6	+	Brassica oleracea	auxin-responsive element	auxin-responsive element
EVM0017725.1	TGA-element	AACGAC	127	6	-	Brassica oleracea	auxin-responsive element	auxin-responsive element
EVM0020914.1	TGA-element	AACGAC	751	6	+	Brassica oleracea	auxin-responsive element	auxin-responsive element
EVM0002565.1	AT-rich element	ATAGAAATCAA	1315	10	+	Glycine max	binding site of AT-rich DNA binding protein (ATBP-1)	binding site of AT-rich DNA binding protein (ATBP-1)
EVM0003060.2	AT-rich element	ATAGAAATCAA	1402	10	+	Glycine max	binding site of AT-rich DNA binding protein (ATBP-1)	binding site of AT-rich DNA binding protein (ATBP-1)
EVM0004711.1	AT-rich element	ATAGAAATCAA	856	10	+	Glycine max	binding site of AT-rich DNA binding protein (ATBP-1)	binding site of AT-rich DNA binding protein (ATBP-1)
EVM0008804.1	AT-rich element	ATAGAAATCAA	1900	11	-	Glycine max	binding site of AT-rich DNA binding protein (ATBP-1)	binding site of AT-rich DNA binding protein (ATBP-1)
EVM0011812.1	AT-rich element	ATAGAAATCAA	357	10	-	Glycine max	binding site of AT-rich DNA binding protein (ATBP-1)	binding site of AT-rich DNA binding protein (ATBP-1)
EVM0011812.1	AT-rich element	ATAGAAATCAA	1062	10	+	Glycine max	binding site of AT-rich DNA binding protein (ATBP-1)	binding site of AT-rich DNA binding protein (ATBP-1)
EVM0015107.1	AT-rich element	ATAGAAATCAA	1234	10	-	Glycine max	binding site of AT-rich DNA binding protein (ATBP-1)	binding site of AT-rich DNA binding protein (ATBP-1)
EVM0016720.1	AT-rich element	ATAGAAATCAA	1413	10	+	Glycine max	binding site of AT-rich DNA binding protein (ATBP-1)	binding site of AT-rich DNA binding protein (ATBP-1)
EVM0020914.1	AT-rich element	ATAGAAATCAA	1900	11	-	Glycine max	binding site of AT-rich DNA binding protein (ATBP-1)	binding site of AT-rich DNA binding protein (ATBP-1)
EVM0002565.1	MSA-like	TCAAACGGT	355	9	+	Catharanthus roseus	cis-acting element involved in cell cycle regulation	cell cycle regulation
EVM0011294.1	MSA-like	TCAAACGGT	21	9	-	Catharanthus roseus	cis-acting element involved in cell cycle regulation	cell cycle regulation
EVM0003060.2	circadian	CAAAGATATC	702	9	-	Lycopersicon esculentum	circadian control	circadian control
EVM0004711.1	circadian	CAAAGATATC	1527	9	+	Lycopersicon esculentum	circadian control	circadian control
EVM0005862.1	circadian	CAAAGATATC	603	9	-	Lycopersicon esculentum	circadian control	circadian control
EVM0011812.1	circadian	CAAAGATATC	1012	9	-	Lycopersicon esculentum	circadian control	circadian control
EVM0016720.1	circadian	CAAAGATATC	1755	9	-	Lycopersicon esculentum	circadian control	circadian control
EVM0002565.1	TC-rich repeats	ATTCTCTAAC	965	9	-	Nicotiana tabacum	defense and stress responsiveness	defense and stress responsiveness
EVM0003060.2	TC-rich repeats	ATTCTCTAAC	266	9	-	Nicotiana tabacum	defense and stress responsiveness	defense and stress responsiveness
EVM0003060.2	TC-rich repeats	ATTCTCTAAC	404	9	+	Nicotiana tabacum	defense and stress responsiveness	defense and stress responsiveness
EVM0003060.2	TC-rich repeats	GTTTTCTTAC	673	9	-	Nicotiana tabacum	defense and stress responsiveness	defense and stress responsiveness
EVM0008804.1	TC-rich repeats	GTTTTCTTAC	1024	9	-	Nicotiana tabacum	defense and stress responsiveness	defense and stress responsiveness
EVM0009170.2	TC-rich repeats	GTTTTCTTAC	1413	9	+	Nicotiana tabacum	defense and stress responsiveness	defense and stress responsiveness
EVM0014685.1	TC-rich repeats	GTTTTCTTAC	47	9	+	Nicotiana tabacum	defense and stress responsiveness	defense and stress responsiveness
EVM0014685.1	TC-rich repeats	GTTTTCTTAC	1756	9	-	Nicotiana tabacum	defense and stress responsiveness	defense and stress responsiveness
EVM0014685.1	TC-rich repeats	GTTTTCTTAC	1973	9	-	Nicotiana tabacum	defense and stress responsiveness	defense and stress responsiveness
EVM0015107.1	TC-rich repeats	ATTCTCTAAC	1078	9	-	Nicotiana tabacum	defense and stress responsiveness	defense and stress responsiveness
EVM0020914.1	TC-rich repeats	GTTTTCTTAC	1023	9	-	Nicotiana tabacum	defense and stress responsiveness	defense and stress responsiveness
EVM0004711.1	MBS	CAACTG	1888	6	-	Arabidopsis thaliana	MYB binding site involved in drought-inducibility	drought-inducibility
EVM0004711.1	MBS	CAACTG	1914	6	+	Arabidopsis thaliana	MYB binding site involved in drought-inducibility	drought-inducibility
EVM0005862.1	MBS	CAACTG	260	6	+	Arabidopsis thaliana	MYB binding site involved in drought-inducibility	drought-inducibility
EVM0009170.2	MBS	CAACTG	1266	6	-	Arabidopsis thaliana	MYB binding site involved in drought-inducibility	drought-inducibility
EVM0011294.1	MBS	CAACTG	1215	6	+	Arabidopsis thaliana	MYB binding site involved in drought-inducibility	drought-inducibility
EVM0011812.1	MBS	CAACTG	108	6	-	Arabidopsis thaliana	MYB binding site involved in drought-inducibility	drought-inducibility
EVM0011812.1	MBS	CAACTG	1256	6	-	Arabidopsis thaliana	MYB binding site involved in drought-inducibility	drought-inducibility
EVM0017725.1	MBS	CAACTG	263	6	+	Arabidopsis thaliana	MYB binding site involved in drought-inducibility	drought-inducibility
EVM0017725.1	MBS	CAACTG	343	6	-	Arabidopsis thaliana	MYB binding site involved in drought-inducibility	drought-inducibility
EVM0017725.1	MBS	CAACTG	1369	6	-	Arabidopsis thaliana	MYB binding site involved in drought-inducibility	drought-inducibility
EVM0002565.1	GCN4_motif	TGAGTCA	230	7	+	Oryza sativa	cis-regulatory element involved in endosperm expression	endosperm expression
EVM0002565.1	GCN4_motif	TGAGTCA	784	7	-	Oryza sativa	cis-regulatory element involved in endosperm expression	endosperm expression
EVM0002565.1	GCN4_motif	TGAGTCA	906	7	+	Oryza sativa	cis-regulatory element involved in endosperm expression	endosperm expression
EVM0011812.1	GCN4_motif	TGAGTCA	1199	7	-	Oryza sativa	cis-regulatory element involved in endosperm expression	endosperm expression
EVM0011812.1	GCN4_motif	TGAGTCA	1260	7	+	Oryza sativa	cis-regulatory element involved in endosperm expression	endosperm expression
EVM0017725.1	GCN4_motif	TGAGTCA	338	7	-	Oryza sativa	cis-regulatory element involved in endosperm expression	endosperm expression
EVM0002565.1	MBSI	aaaAaaC(G/C)GTTA	469	10.5	+	Petunia hybrida	MYB binding site involved in flavonoid biosynthetic genes regulation	flavonoid biosynthetic genes regulation
EVM0008804.1	MBSI	aaaAaaC(G/C)GTTA	463	11	-	Petunia hybrida	MYB binding site involved in flavonoid biosynthetic genes regulation	flavonoid biosynthetic genes regulation
EVM0002565.1	P-box	CCTTTTG	1341	7	-	Oryza sativa	gibberellin-responsive element	gibberellin-responsive
EVM0005862.1	P-box	CCTTTTG	726	7	-	Oryza sativa	gibberellin-responsive element	gibberellin-responsive
EVM0008804.1	P-box	CCTTTTG	1448	7	+	Oryza sativa	gibberellin-responsive element	gibberellin-responsive
EVM0008804.1	GARE-motif	TCTGTTG	1462	7	+	Brassica oleracea	gibberellin-responsive element	gibberellin-responsive
EVM0011294.1	GARE-motif	TCTGTTG	338	7	+	Brassica oleracea	gibberellin-responsive element	gibberellin-responsive
EVM0016720.1	GARE-motif	TCTGTTG	901	7	+	Brassica oleracea	gibberellin-responsive element	gibberellin-responsive
EVM0020914.1	P-box	CCTTTTG	1446	7	+	Oryza sativa	gibberellin-responsive element	gibberellin-responsive
EVM0020914.1	GARE-motif	TCTGTTG	1460	7	+	Brassica oleracea	gibberellin-responsive element	gibberellin-responsive
EVM0004711.1	TATC-box	TATCCCA	1720	7	+	Oryza sativa	gibberellin-responsiveness	gibberellin-responsive
EVM0005862.1	TATC-box	TATCCCA	1034	7	+	Oryza sativa	gibberellin-responsiveness	gibberellin-responsive
EVM0005862.1	TATC-box	TATCCCA	1494	7	+	Oryza sativa	gibberellin-responsiveness	gibberellin-responsive
EVM0017725.1	TATC-box	TATCCCA	1373	7	-	Oryza sativa	gibberellin-responsiveness	gibberellin-responsive
EVM0005862.1	AT1-motif	AATTATTTTTTATT	387	13	+	Solanum tuberosum	light responsive	light responsive
EVM0008804.1	AT1-motif	AATTATTTTTTATT	887	13	+	Solanum tuberosum	light responsive	light responsive
EVM0014685.1	AT1-motif	AATTATTTTTTATT	1327	13	+	Solanum tuberosum	light responsive	light responsive
EVM0002565.1	GT1-motif	GGTTAA	1001	6	-	Arabidopsis thaliana	light responsive element	light responsive element
EVM0003060.2	GT1-motif	GGTTAA	925	6	+	Arabidopsis thaliana	light responsive element	light responsive element
EVM0004711.1	GT1-motif	GGTTAA	1455	6	+	Arabidopsis thaliana	light responsive element	light responsive element
EVM0011294.1	GT1-motif	GGTTAA	429	6	+	Arabidopsis thaliana	light responsive element	light responsive element
EVM0011812.1	GT1-motif	GGTTAA	380	6	+	Arabidopsis thaliana	light responsive element	light responsive element
EVM0014685.1	GT1-motif	GGTTAAT	95	7	-	Avena sativa	light responsive element	light responsive element
EVM0014685.1	GT1-motif	GGTTAA	96	6	-	Arabidopsis thaliana	light responsive element	light responsive element
EVM0014685.1	Sp1	GGGCGG	881	6	+	Oryza sativa	light responsive element	light responsive element
EVM0015107.1	3-AF1 binding site	TAAGAGAGGAA	960	10	+	Solanum tuberosum	light responsive element	light responsive element
EVM0016720.1	Sp1	GGGCGG	1879	6	-	Oryza sativa	light responsive element	light responsive element
EVM0020914.1	GT1-motif	GTGTGTGAA	17	9	-	Solanum tuberosum	light responsive element	light responsive element
EVM0020914.1	GT1-motif	GGTTAAT	720	7	+	Avena sativa	light responsive element	light responsive element
EVM0002565.1	Box 4	ATTAAT	581	6	+	Petroselinum crispum	light responsiveness	light responsiveness
EVM0002565.1	AE-box	AGAAACAA	606	8	-	Arabidopsis thaliana	part of a module for light response	light responsiveness
EVM0002565.1	Box 4	ATTAAT	730	6	+	Petroselinum crispum	light responsiveness	light responsiveness
EVM0002565.1	Box 4	ATTAAT	792	6	+	Petroselinum crispum	light responsiveness	light responsiveness
EVM0002565.1	G-box	CACGAC	862	6	-	Zea mays	light responsiveness	light responsiveness
EVM0002565.1	G-Box	CACGTT	988	6	-	Pisum sativum	light responsiveness	light responsiveness
EVM0002565.1	Box 4	ATTAAT	1078	6	-	Petroselinum crispum	light responsiveness	light responsiveness
EVM0002565.1	ACE	CTAACGTATT	1202	9	-	Petroselinum crispum	light responsiveness	light responsiveness
EVM0002565.1	TCCC-motif	TCTCCCT	1291	7	-	Spinacia oleracea	light responsiveness	light responsiveness
EVM0002565.1	I-box	gGATAAGGTG	1293	9	+	Zea mays	light responsiveness	light responsiveness
EVM0002565.1	MRE	AACCTAA	1573	7	+	Petroselinum crispum	MYB binding site involved in light responsiveness	light responsiveness
EVM0002565.1	GATA-motif	AAGGATAAGG	1908	9	+	Solanum tuberosum	light responsiveness	light responsiveness
EVM0003060.2	G-box	CACGAC	208	6	-	Zea mays	light responsiveness	light responsiveness
EVM0003060.2	G-box	CACGTC	462	6	-	Zea mays	light responsiveness	light responsiveness
EVM0003060.2	GATA-motif	GATAGGA	739	7	-	Arabidopsis thaliana	light responsiveness	light responsiveness
EVM0003060.2	Box 4	ATTAAT	1416	6	-	Petroselinum crispum	light responsiveness	light responsiveness
EVM0003060.2	TCT-motif	TCTTAC	1429	6	+	Arabidopsis thaliana	light responsiveness	light responsiveness
EVM0003060.2	TCCC-motif	TCTCCCT	1822	7	+	Spinacia oleracea	light responsiveness	light responsiveness
EVM0003060.2	I-box	gGATAAGGTG	1955	9	-	Zea mays	light responsiveness	light responsiveness
EVM0004711.1	MRE	AACCTAA	132	7	-	Petroselinum crispum	MYB binding site involved in light responsiveness	light responsiveness
EVM0004711.1	Box 4	ATTAAT	608	6	+	Petroselinum crispum	light responsiveness	light responsiveness
EVM0004711.1	Box 4	ATTAAT	653	6	+	Petroselinum crispum	light responsiveness	light responsiveness
EVM0004711.1	MRE	AACCTAA	826	7	-	Petroselinum crispum	MYB binding site involved in light responsiveness	light responsiveness
EVM0004711.1	GA-motif	ATAGATAA	1348	8	-	Arabidopsis thaliana	light responsiveness	light responsiveness
EVM0004711.1	G-Box	CACGTG	1557	6	-	Pisum sativum	light responsiveness	light responsiveness
EVM0004711.1	GATA-motif	GATAGGA	1761	7	+	Arabidopsis thaliana	light responsiveness	light responsiveness
EVM0004711.1	G-box	CACGTC	1804	6	+	Zea mays	light responsiveness	light responsiveness
EVM0004711.1	G-box	CACGTC	1883	6	+	Zea mays	light responsiveness	light responsiveness
EVM0004711.1	G-box	ACACGTGT	1894	8	-	Brassica napus	light responsiveness	light responsiveness
EVM0004711.1	I-box	AGATAAGG	1951	8	-	Triticum aestivum	light responsiveness	light responsiveness
EVM0005862.1	TCCC-motif	TCTCCCT	21	7	+	Spinacia oleracea	light responsiveness	light responsiveness
EVM0005862.1	TCT-motif	TCTTAC	32	6	+	Arabidopsis thaliana	light responsiveness	light responsiveness
EVM0005862.1	TCT-motif	TCTTAC	78	6	+	Arabidopsis thaliana	light responsiveness	light responsiveness
EVM0005862.1	chs-CMA1a	TTACTTAA	221	8	-	Daucus carota	light responsiveness	light responsiveness
EVM0005862.1	Box 4	ATTAAT	241	6	+	Petroselinum crispum	light responsiveness	light responsiveness
EVM0005862.1	Box 4	ATTAAT	278	6	+	Petroselinum crispum	light responsiveness	light responsiveness
EVM0005862.1	AE-box	AGAAACTT	425	8	-	Arabidopsis thaliana	part of a module for light response	light responsiveness
EVM0005862.1	Box 4	ATTAAT	449	6	+	Petroselinum crispum	light responsiveness	light responsiveness
EVM0005862.1	G-box	CACGAC	973	6	+	Zea mays	light responsiveness	light responsiveness
EVM0005862.1	G-box	TACGTG	1341	6	-	Arabidopsis thaliana	light responsiveness	light responsiveness
EVM0005862.1	Box 4	ATTAAT	1607	6	-	Petroselinum crispum	light responsiveness	light responsiveness
EVM0005862.1	Box 4	ATTAAT	1613	6	-	Petroselinum crispum	light responsiveness	light responsiveness
EVM0005862.1	AE-box	AGAAACTT	1796	8	+	Arabidopsis thaliana	part of a module for light response	light responsiveness
EVM0005862.1	G-box	CACGTG	1845	6	-	Arabidopsis thaliana	light responsiveness	light responsiveness
EVM0005862.1	GA-motif	ATAGATAA	1924	8	-	Arabidopsis thaliana	light responsiveness	light responsiveness
EVM0008804.1	G-box	GCCACGTGGA	238	9	-	Arabidopsis thaliana	light responsiveness	light responsiveness
EVM0008804.1	Box II	CCACGTGGC	239	9	+	Petroselinum crispum	light responsiveness	light responsiveness
EVM0008804.1	G-Box	CACGTG	240	6	+	Pisum sativum	light responsiveness	light responsiveness
EVM0008804.1	Box 4	ATTAAT	458	6	+	Petroselinum crispum	light responsiveness	light responsiveness
EVM0008804.1	Box 4	ATTAAT	513	6	+	Petroselinum crispum	light responsiveness	light responsiveness
EVM0008804.1	Box 4	ATTAAT	824	6	+	Petroselinum crispum	light responsiveness	light responsiveness
EVM0008804.1	Box 4	ATTAAT	831	6	+	Petroselinum crispum	light responsiveness	light responsiveness
EVM0008804.1	G-box	TAACACGTAG	838	9	-	Brassica oleracea	light responsiveness	light responsiveness
EVM0008804.1	AE-box	AGAAACAA	852	8	+	Arabidopsis thaliana	part of a module for light response	light responsiveness
EVM0008804.1	Box 4	ATTAAT	870	6	+	Petroselinum crispum	light responsiveness	light responsiveness
EVM0008804.1	Box 4	ATTAAT	898	6	+	Petroselinum crispum	light responsiveness	light responsiveness
EVM0008804.1	TCT-motif	TCTTAC	1024	6	-	Arabidopsis thaliana	light responsiveness	light responsiveness
EVM0008804.1	TCT-motif	TCTTAC	1477	6	+	Arabidopsis thaliana	light responsiveness	light responsiveness
EVM0008804.1	Box 4	ATTAAT	1798	6	-	Petroselinum crispum	light responsiveness	light responsiveness
EVM0008804.1	Box 4	ATTAAT	1950	6	-	Petroselinum crispum	light responsiveness	light responsiveness
EVM0009170.2	ATC-motif	AGTAATCT	124	8	+	Spinacia oleracea	light responsiveness	light responsiveness
EVM0009170.2	TCT-motif	TCTTAC	157	6	-	Arabidopsis thaliana	light responsiveness	light responsiveness
EVM0009170.2	ATCT-motif	AATCTAATCC	216	9	-	Pisum sativum	light responsiveness	light responsiveness
EVM0009170.2	G-box	CACGTC	454	6	-	Zea mays	light responsiveness	light responsiveness
EVM0009170.2	ACE	CTAACGTATT	586	9	+	Petroselinum crispum	light responsiveness	light responsiveness
EVM0009170.2	TCT-motif	TCTTAC	739	6	-	Arabidopsis thaliana	light responsiveness	light responsiveness
EVM0009170.2	G-box	CACGTC	1353	6	-	Zea mays	light responsiveness	light responsiveness
EVM0009170.2	TCT-motif	TCTTAC	1417	6	+	Arabidopsis thaliana	light responsiveness	light responsiveness
EVM0009170.2	G-Box	CACGTT	1433	6	+	Pisum sativum	light responsiveness	light responsiveness
EVM0009170.2	G-box	CACGAC	1502	6	-	Zea mays	light responsiveness	light responsiveness
EVM0009170.2	G-box	CACGTC	1748	6	+	Zea mays	light responsiveness	light responsiveness
EVM0009170.2	I-box	gGATAAGGTG	1783	9	-	Zea mays	light responsiveness	light responsiveness
EVM0009170.2	G-Box	CACGTT	1844	6	+	Pisum sativum	light responsiveness	light responsiveness
EVM0009170.2	Box 4	ATTAAT	1907	6	-	Petroselinum crispum	light responsiveness	light responsiveness
EVM0011294.1	G-box	CACGTC	184	6	+	Zea mays	light responsiveness	light responsiveness
EVM0011294.1	Box 4	ATTAAT	204	6	+	Petroselinum crispum	light responsiveness	light responsiveness
EVM0011294.1	MRE	AACCTAA	220	7	-	Petroselinum crispum	MYB binding site involved in light responsiveness	light responsiveness
EVM0011294.1	GATA-motif	AAGATAAGATT	723	10	-	Arabidopsis thaliana	light responsiveness	light responsiveness
EVM0011294.1	Box 4	ATTAAT	1683	6	-	Petroselinum crispum	light responsiveness	light responsiveness
EVM0011294.1	Box 4	ATTAAT	1687	6	-	Petroselinum crispum	light responsiveness	light responsiveness
EVM0011294.1	Box 4	ATTAAT	1691	6	-	Petroselinum crispum	light responsiveness	light responsiveness
EVM0011294.1	Box 4	ATTAAT	1695	6	-	Petroselinum crispum	light responsiveness	light responsiveness
EVM0011294.1	GA-motif	ATAGATAA	1921	8	+	Arabidopsis thaliana	light responsiveness	light responsiveness
EVM0011812.1	Box 4	ATTAAT	347	6	+	Petroselinum crispum	light responsiveness	light responsiveness
EVM0011812.1	chs-CMA2a	TCACTTGA	435	8	+	Petroselinum crispum	light responsiveness	light responsiveness
EVM0011812.1	G-box	CACGTC	535	6	+	Zea mays	light responsiveness	light responsiveness
EVM0011812.1	G-box	TACGTG	544	6	-	Arabidopsis thaliana	light responsiveness	light responsiveness
EVM0011812.1	TCT-motif	TCTTAC	603	6	-	Arabidopsis thaliana	light responsiveness	light responsiveness
EVM0011812.1	GATA-motif	AAGATAAGATT	659	10	+	Arabidopsis thaliana	light responsiveness	light responsiveness
EVM0011812.1	Box 4	ATTAAT	1083	6	-	Petroselinum crispum	light responsiveness	light responsiveness
EVM0011812.1	ATCT-motif	AATCTAATCC	1179	9	+	Pisum sativum	light responsiveness	light responsiveness
EVM0011812.1	Box 4	ATTAAT	1297	6	-	Petroselinum crispum	light responsiveness	light responsiveness
EVM0011812.1	G-box	GCCACGTGGA	1636	9	-	Arabidopsis thaliana	light responsiveness	light responsiveness
EVM0011812.1	Box II	CCACGTGGC	1637	9	+	Petroselinum crispum	light responsiveness	light responsiveness
EVM0011812.1	G-box	CACGTG	1638	6	-	Arabidopsis thaliana	light responsiveness	light responsiveness
EVM0011812.1	G-box	TCCACGTGGCATT	1783	12	-	Arabidopsis thaliana	light responsiveness	light responsiveness
EVM0011812.1	G-box	CTTCCACGTGGCA	1785	12	-	Arabidopsis thaliana	light responsiveness	light responsiveness
EVM0011812.1	Box II	CCACGTGGC	1786	9	-	Petroselinum crispum	light responsiveness	light responsiveness
EVM0011812.1	G-box	GCCACGTGGA	1786	10	+	Arabidopsis thaliana	light responsiveness	light responsiveness
EVM0011812.1	G-box	CACGTG	1788	6	-	Arabidopsis thaliana	light responsiveness	light responsiveness
EVM0011812.1	G-box	CACGAC	1809	6	+	Zea mays	light responsiveness	light responsiveness
EVM0011812.1	MRE	AACCTAA	1974	7	-	Petroselinum crispum	MYB binding site involved in light responsiveness	light responsiveness
EVM0014685.1	Box 4	ATTAAT	1265	6	-	Petroselinum crispum	light responsiveness	light responsiveness
EVM0014685.1	I-box	TGATAATGT	1292	9	-	Solanum tuberosum	light responsiveness	light responsiveness
EVM0015107.1	TCT-motif	TCTTAC	190	6	+	Arabidopsis thaliana	light responsiveness	light responsiveness
EVM0015107.1	ACE	CTAACGTATT	634	9	+	Petroselinum crispum	light responsiveness	light responsiveness
EVM0015107.1	GATA-motif	GATAGGG	1099	7	+	Pisum sativum	light responsiveness	light responsiveness
EVM0015107.1	Box 4	ATTAAT	1243	6	-	Petroselinum crispum	light responsiveness	light responsiveness
EVM0015107.1	AE-box	AGAAACTT	1644	8	+	Arabidopsis thaliana	part of a module for light response	light responsiveness
EVM0015107.1	TCT-motif	TCTTAC	1730	6	+	Arabidopsis thaliana	light responsiveness	light responsiveness
EVM0015107.1	I-box	AAGATAAGGCT	1768	10	+	Gossypium hirsutum	light responsiveness	light responsiveness
EVM0015107.1	MRE	AACCTAA	1807	7	-	Petroselinum crispum	MYB binding site involved in light responsiveness	light responsiveness
EVM0015107.1	GA-motif	ATAGATAA	1947	8	-	Arabidopsis thaliana	light responsiveness	light responsiveness
EVM0016720.1	Box 4	ATTAAT	170	6	+	Petroselinum crispum	light responsiveness	light responsiveness
EVM0016720.1	TCT-motif	TCTTAC	293	6	-	Arabidopsis thaliana	light responsiveness	light responsiveness
EVM0016720.1	I-box	AGATAAGG	675	8	-	Triticum aestivum	light responsiveness	light responsiveness
EVM0016720.1	AE-box	AGAAACTT	1029	8	+	Arabidopsis thaliana	part of a module for light response	light responsiveness
EVM0016720.1	TCT-motif	TCTTAC	1213	6	-	Arabidopsis thaliana	light responsiveness	light responsiveness
EVM0016720.1	GA-motif	ATAGATAA	1672	8	+	Arabidopsis thaliana	light responsiveness	light responsiveness
EVM0017725.1	GATA-motif	GATAGGA	385	7	+	Arabidopsis thaliana	light responsiveness	light responsiveness
EVM0017725.1	G-Box	CACGTT	567	6	-	Pisum sativum	light responsiveness	light responsiveness
EVM0017725.1	TCT-motif	TCTTAC	647	6	-	Arabidopsis thaliana	light responsiveness	light responsiveness
EVM0017725.1	Box 4	ATTAAT	1168	6	-	Petroselinum crispum	light responsiveness	light responsiveness
EVM0017725.1	MRE	AACCTAA	1874	7	+	Petroselinum crispum	MYB binding site involved in light responsiveness	light responsiveness
EVM0020914.1	GATA-motif	GATAGGA	86	7	-	Arabidopsis thaliana	light responsiveness	light responsiveness
EVM0020914.1	Box 4	ATTAAT	219	6	+	Petroselinum crispum	light responsiveness	light responsiveness
EVM0020914.1	Box 4	ATTAAT	238	6	+	Petroselinum crispum	light responsiveness	light responsiveness
EVM0020914.1	I-box	AAGATAAGGCT	762	10	-	Gossypium hirsutum	light responsiveness	light responsiveness
EVM0020914.1	TCT-motif	TCTTAC	1023	6	-	Arabidopsis thaliana	light responsiveness	light responsiveness
EVM0020914.1	TCT-motif	TCTTAC	1475	6	+	Arabidopsis thaliana	light responsiveness	light responsiveness
EVM0020914.1	Box 4	ATTAAT	1798	6	-	Petroselinum crispum	light responsiveness	light responsiveness
EVM0020914.1	Box 4	ATTAAT	1950	6	-	Petroselinum crispum	light responsiveness	light responsiveness
EVM0004711.1	LTR	CCGAAA	1682	6	+	Hordeum vulgare	low-temperature responsiveness	low-temperature responsiveness
EVM0011294.1	LTR	CCGAAA	1462	6	+	Hordeum vulgare	low-temperature responsiveness	low-temperature responsiveness
EVM0014685.1	LTR	CCGAAA	674	6	-	Hordeum vulgare	low-temperature responsiveness	low-temperature responsiveness
EVM0015107.1	LTR	CCGAAA	10	6	-	Hordeum vulgare	low-temperature responsiveness	low-temperature responsiveness
EVM0016720.1	LTR	CCGAAA	1733	6	-	Hordeum vulgare	low-temperature responsiveness	low-temperature responsiveness
EVM0003060.2	CGTCA-motif	CGTCA	586	5	+	Hordeum vulgare	MeJA-responsiveness	MeJA-responsiveness
EVM0003060.2	TGACG-motif	TGACG	586	5	-	Hordeum vulgare	MeJA-responsiveness	MeJA-responsiveness
EVM0004711.1	CGTCA-motif	CGTCA	24	5	-	Hordeum vulgare	MeJA-responsiveness	MeJA-responsiveness
EVM0004711.1	TGACG-motif	TGACG	1191	5	-	Hordeum vulgare	MeJA-responsiveness	MeJA-responsiveness
EVM0004711.1	CGTCA-motif	CGTCA	1191	5	+	Hordeum vulgare	MeJA-responsiveness	MeJA-responsiveness
EVM0004711.1	TGACG-motif	TGACG	1356	5	+	Hordeum vulgare	MeJA-responsiveness	MeJA-responsiveness
EVM0004711.1	CGTCA-motif	CGTCA	1356	5	-	Hordeum vulgare	MeJA-responsiveness	MeJA-responsiveness
EVM0004711.1	TGACG-motif	TGACG	1885	5	-	Hordeum vulgare	MeJA-responsiveness	MeJA-responsiveness
EVM0005862.1	TGACG-motif	TGACG	577	5	+	Hordeum vulgare	MeJA-responsiveness	MeJA-responsiveness
EVM0005862.1	TGACG-motif	TGACG	680	5	+	Hordeum vulgare	MeJA-responsiveness	MeJA-responsiveness
EVM0009170.2	TGACG-motif	TGACG	453	5	+	Hordeum vulgare	MeJA-responsiveness	MeJA-responsiveness
EVM0009170.2	CGTCA-motif	CGTCA	453	5	-	Hordeum vulgare	MeJA-responsiveness	MeJA-responsiveness
EVM0011294.1	TGACG-motif	TGACG	186	5	-	Hordeum vulgare	MeJA-responsiveness	MeJA-responsiveness
EVM0011294.1	CGTCA-motif	CGTCA	186	5	+	Hordeum vulgare	MeJA-responsiveness	MeJA-responsiveness
EVM0011812.1	TGACG-motif	TGACG	537	5	-	Hordeum vulgare	MeJA-responsiveness	MeJA-responsiveness
EVM0011812.1	CGTCA-motif	CGTCA	537	5	+	Hordeum vulgare	MeJA-responsiveness	MeJA-responsiveness
EVM0015107.1	CGTCA-motif	CGTCA	1860	5	+	Hordeum vulgare	MeJA-responsiveness	MeJA-responsiveness
EVM0015107.1	TGACG-motif	TGACG	1860	5	-	Hordeum vulgare	MeJA-responsiveness	MeJA-responsiveness
EVM0020914.1	CGTCA-motif	CGTCA	693	5	+	Hordeum vulgare	MeJA-responsiveness	MeJA-responsiveness
EVM0020914.1	TGACG-motif	TGACG	693	5	-	Hordeum vulgare	MeJA-responsiveness	MeJA-responsiveness
EVM0005862.1	CAT-box	GCCACT	1467	6	+	Arabidopsis thaliana	meristem expression	meristem expression
EVM0008804.1	CAT-box	GCCACT	1150	6	+	Arabidopsis thaliana	meristem expression	meristem expression
EVM0009170.2	CAT-box	GCCACT	20	6	+	Arabidopsis thaliana	meristem expression	meristem expression
EVM0011294.1	CAT-box	GCCACT	67	6	+	Arabidopsis thaliana	meristem expression	meristem expression
EVM0011294.1	CAT-box	GCCACT	789	6	-	Arabidopsis thaliana	meristem expression	meristem expression
EVM0017725.1	CAT-box	GCCACT	306	6	-	Arabidopsis thaliana	meristem expression	meristem expression
EVM0017725.1	CAT-box	GCCACT	1390	6	-	Arabidopsis thaliana	meristem expression	meristem expression
EVM0020914.1	CAT-box	GCCACT	1149	6	+	Arabidopsis thaliana	meristem expression	meristem expression
EVM0002565.1	CCAAT-box	CAACGG	1934	6	-	Hordeum vulgare	MYBHv1 binding site	MYBHv1 binding site
EVM0011812.1	HD-Zip 1	CAAT(A/T)ATTG	1091	8.5	-	Arabidopsis thaliana	palisade mesophyll cells	palisade mesophyll cells
EVM0004711.1	TCA-element	CCATCTTTTT	850	9	-	Nicotiana tabacum	salicylic acid responsiveness	salicylic acid responsiveness
EVM0004711.1	TCA-element	CCATCTTTTT	1364	9	-	Nicotiana tabacum	salicylic acid responsiveness	salicylic acid responsiveness
EVM0005862.1	TCA-element	CCATCTTTTT	1916	9	+	Nicotiana tabacum	salicylic acid responsiveness	salicylic acid responsiveness
EVM0008804.1	TCA-element	CCATCTTTTT	1304	9	+	Nicotiana tabacum	salicylic acid responsiveness	salicylic acid responsiveness
EVM0014685.1	TCA-element	CCATCTTTTT	78	9	+	Nicotiana tabacum	salicylic acid responsiveness	salicylic acid responsiveness
EVM0015107.1	TCA-element	CCATCTTTTT	199	9	+	Nicotiana tabacum	salicylic acid responsiveness	salicylic acid responsiveness
EVM0015107.1	TCA-element	CCATCTTTTT	311	9	-	Nicotiana tabacum	salicylic acid responsiveness	salicylic acid responsiveness
EVM0016720.1	TCA-element	CCATCTTTTT	913	9	+	Nicotiana tabacum	salicylic acid responsiveness	salicylic acid responsiveness
EVM0017725.1	TCA-element	TCAGAAGAGG	1291	9	+	Brassica oleracea	salicylic acid responsiveness	salicylic acid responsiveness
EVM0017725.1	TCA-element	TCAGAAGAGG	1593	9	+	Brassica oleracea	salicylic acid responsiveness	salicylic acid responsiveness
EVM0011294.1	RY-element	CATGCATG	1009	8	-	Helianthus annuus	seed-specific regulation	seed-specific regulation
EVM0005862.1	O2-site	GATGACATGG	1231	9	-	Zea mays	zein metabolism regulation	zein metabolism regulation
EVM0009170.2	O2-site	GATGACATGG	386	9	+	Zea mays	zein metabolism regulation	zein metabolism regulation
EVM0011294.1	O2-site	GATGACATGG	295	10	+	Zea mays	zein metabolism regulation	zein metabolism regulation
EVM0011812.1	O2-site	GTTGACGTGA	534	9	-	Zea mays	zein metabolism regulation	zein metabolism regulation
EVM0014685.1	O2-site	GATGACATGG	276	9	+	Zea mays	zein metabolism regulation	zein metabolism regulation
EVM0016720.1	O2-site	GTTGACGTGA	1513	9	-	Zea mays	zein metabolism regulation	zein metabolism regulation
EVM0020914.1	O2-site	GATGATGTGG	927	9	-	Zea mays	zein metabolism regulation	zein metabolism regulation
EVM0002565.1	MYB	CAACCA	244	6	-	Arabidopsis thaliana	MYB binding site	stress-responsive
EVM0002565.1	MYC	CAATTG	323	6	+	Arabidopsis thaliana	MYC binding site	stress-responsive
EVM0002565.1	MYC	CATGTG	370	6	-	Arabidopsis thaliana	MYC binding site	stress-responsive
EVM0002565.1	Myb	TAACTG	415	6	-	Arabidopsis thaliana	MYB binding site	stress-responsive
EVM0002565.1	MYC	CATTTG	448	6	-	Arabidopsis thaliana	MYC binding site	stress-responsive
EVM0002565.1	MYC	CATTTG	689	6	-	Arabidopsis thaliana	MYC binding site	stress-responsive
EVM0002565.1	MYC	CAATTG	1012	6	-	Arabidopsis thaliana	MYC binding site	stress-responsive
EVM0002565.1	Myc	TCTCTTA	1111	7	-	Arabidopsis thaliana	MYC binding site	stress-responsive
EVM0002565.1	Myc	TCTCTTA	1140	7	-	Arabidopsis thaliana	MYC binding site	stress-responsive
EVM0002565.1	Myc	TCTCTTA	1239	7	-	Arabidopsis thaliana	MYC binding site	stress-responsive
EVM0002565.1	MYB	TAACCA	1425	6	+	Arabidopsis thaliana	MYB binding site	stress-responsive
EVM0002565.1	MYB recognition site	CCGTTG	1934	6	+	Arabidopsis thaliana	MYB binding site	stress-responsive
EVM0003060.2	MYB	TAACCA	1377	6	-	Arabidopsis thaliana	MYB binding site	stress-responsive
EVM0003060.2	Myc	TCTCTTA	1393	7	+	Arabidopsis thaliana	MYC binding site	stress-responsive
EVM0003060.2	Myb	TAACTG	1434	6	-	Arabidopsis thaliana	MYB binding site	stress-responsive
EVM0003060.2	MYC	CAATTG	1598	6	-	Arabidopsis thaliana	MYC binding site	stress-responsive
EVM0003060.2	MYB recognition site	CCGTTG	1847	6	+	Arabidopsis thaliana	MYB binding site	stress-responsive
EVM0003060.2	MYC	CATTTG	1919	6	+	Arabidopsis thaliana	MYC binding site	stress-responsive
EVM0004711.1	MYC	CAATTG	46	6	+	Arabidopsis thaliana	MYC binding site	stress-responsive
EVM0004711.1	Myb	TAACTG	924	6	-	Arabidopsis thaliana	MYB binding site	stress-responsive
EVM0004711.1	MYC	CAATTG	1227	6	-	Arabidopsis thaliana	MYC binding site	stress-responsive
EVM0004711.1	MYC	CAATTG	1429	6	-	Arabidopsis thaliana	MYC binding site	stress-responsive
EVM0004711.1	MYC	CATGTG	1503	6	-	Arabidopsis thaliana	MYC binding site	stress-responsive
EVM0004711.1	MYB	CAACCA	1825	6	+	Arabidopsis thaliana	MYB binding site	stress-responsive
EVM0004711.1	MYB	TAACCA	1840	6	+	Arabidopsis thaliana	MYB binding site	stress-responsive
EVM0004711.1	MYC	CATTTG	1864	6	+	Arabidopsis thaliana	MYC binding site	stress-responsive
EVM0005862.1	MYC	CATTTG	142	6	-	Arabidopsis thaliana	MYC binding site	stress-responsive
EVM0005862.1	MYB recognition site	CCGTTG	327	6	-	Arabidopsis thaliana	MYB binding site	stress-responsive
EVM0005862.1	MYC	CAATTG	940	6	+	Arabidopsis thaliana	MYC binding site	stress-responsive
EVM0005862.1	MYC	CATGTG	1039	6	+	Arabidopsis thaliana	MYC binding site	stress-responsive
EVM0005862.1	MYC	CATTTG	1302	6	-	Arabidopsis thaliana	MYC binding site	stress-responsive
EVM0005862.1	MYC	CAATTG	1388	6	-	Arabidopsis thaliana	MYC binding site	stress-responsive
EVM0005862.1	MYC	CAATTG	1546	6	-	Arabidopsis thaliana	MYC binding site	stress-responsive
EVM0005862.1	MYC	CAATTG	1580	6	-	Arabidopsis thaliana	MYC binding site	stress-responsive
EVM0005862.1	MYC	CATTTG	1662	6	+	Arabidopsis thaliana	MYC binding site	stress-responsive
EVM0005862.1	Myc	TCTCTTA	1728	7	-	Arabidopsis thaliana	MYC binding site	stress-responsive
EVM0005862.1	Myb	TAACTG	1961	6	-	Arabidopsis thaliana	MYB binding site	stress-responsive
EVM0008804.1	MYC	CATTTG	100	6	+	Arabidopsis thaliana	MYC binding site	stress-responsive
EVM0008804.1	MYC	CATTTG	189	6	+	Arabidopsis thaliana	MYC binding site	stress-responsive
EVM0008804.1	MYB	CAACCA	236	6	+	Arabidopsis thaliana	MYB binding site	stress-responsive
EVM0008804.1	Myb	TAACTG	463	6	+	Arabidopsis thaliana	MYB binding site	stress-responsive
EVM0008804.1	MYC	CATTTG	808	6	-	Arabidopsis thaliana	MYC binding site	stress-responsive
EVM0008804.1	MYB	CAACAG	1463	6	-	Arabidopsis thaliana	MYB binding site	stress-responsive
EVM0008804.1	MYC	CAATTG	1742	6	-	Arabidopsis thaliana	MYC binding site	stress-responsive
EVM0009170.2	MYC	CATTTG	438	6	+	Arabidopsis thaliana	MYC binding site	stress-responsive
EVM0009170.2	MYC	CAATTG	883	6	+	Arabidopsis thaliana	MYC binding site	stress-responsive
EVM0009170.2	Myb	TAACTG	1045	6	-	Arabidopsis thaliana	MYB binding site	stress-responsive
EVM0009170.2	Myb	TAACTG	1075	6	+	Arabidopsis thaliana	MYB binding site	stress-responsive
EVM0009170.2	MYC	CATGTG	1250	6	+	Arabidopsis thaliana	MYC binding site	stress-responsive
EVM0009170.2	Myb	TAACTG	1922	6	-	Arabidopsis thaliana	MYB binding site	stress-responsive
EVM0009170.2	MYC	CATTTG	1959	6	-	Arabidopsis thaliana	MYC binding site	stress-responsive
EVM0009170.2	MYB	TAACCA	1973	6	-	Arabidopsis thaliana	MYB binding site	stress-responsive
EVM0011294.1	MYB	CAACAG	339	6	-	Arabidopsis thaliana	MYB binding site	stress-responsive
EVM0011294.1	MYB	TAACCA	428	6	-	Arabidopsis thaliana	MYB binding site	stress-responsive
EVM0011294.1	MYC	CATTTG	706	6	-	Arabidopsis thaliana	MYC binding site	stress-responsive
EVM0011294.1	MYC	CAATTG	897	6	+	Arabidopsis thaliana	MYC binding site	stress-responsive
EVM0011294.1	MYB	CAACCA	996	6	-	Arabidopsis thaliana	MYB binding site	stress-responsive
EVM0011294.1	Myc	TCTCTTA	1038	7	-	Arabidopsis thaliana	MYC binding site	stress-responsive
EVM0011294.1	MYC	CATGTG	1104	6	+	Arabidopsis thaliana	MYC binding site	stress-responsive
EVM0011294.1	MYC	CAATTG	1201	6	-	Arabidopsis thaliana	MYC binding site	stress-responsive
EVM0011294.1	MYB	TAACCA	1607	6	-	Arabidopsis thaliana	MYB binding site	stress-responsive
EVM0011812.1	MYC	CAATTG	146	6	+	Arabidopsis thaliana	MYC binding site	stress-responsive
EVM0011812.1	MYB	CAACCA	979	6	-	Arabidopsis thaliana	MYB binding site	stress-responsive
EVM0014685.1	MYB	TAACCA	97	6	+	Arabidopsis thaliana	MYB binding site	stress-responsive
EVM0014685.1	MYC	CATGTG	177	6	+	Arabidopsis thaliana	MYC binding site	stress-responsive
EVM0014685.1	MYC	CATTTG	534	6	-	Arabidopsis thaliana	MYC binding site	stress-responsive
EVM0014685.1	Myb	TAACTG	754	6	+	Arabidopsis thaliana	MYB binding site	stress-responsive
EVM0014685.1	Myb	TAACTG	1323	6	-	Arabidopsis thaliana	MYB binding site	stress-responsive
EVM0014685.1	MYC	CAATTG	1737	6	-	Arabidopsis thaliana	MYC binding site	stress-responsive
EVM0015107.1	MYC	CATGTG	673	6	+	Arabidopsis thaliana	MYC binding site	stress-responsive
EVM0015107.1	MYC	CAATTG	692	6	+	Arabidopsis thaliana	MYC binding site	stress-responsive
EVM0015107.1	MYB	TAACCA	837	6	-	Arabidopsis thaliana	MYB binding site	stress-responsive
EVM0015107.1	MYC	CATTTG	851	6	+	Arabidopsis thaliana	MYC binding site	stress-responsive
EVM0015107.1	MYC	CATTTG	1689	6	+	Arabidopsis thaliana	MYC binding site	stress-responsive
EVM0015107.1	Myc	TCTCTTA	1728	7	+	Arabidopsis thaliana	MYC binding site	stress-responsive
EVM0016720.1	MYC	CATTTG	220	6	+	Arabidopsis thaliana	MYC binding site	stress-responsive
EVM0016720.1	MYC	CATTTG	728	6	-	Arabidopsis thaliana	MYC binding site	stress-responsive
EVM0016720.1	MYC	CATTTG	779	6	-	Arabidopsis thaliana	MYC binding site	stress-responsive
EVM0016720.1	MYB	CAACAG	902	6	-	Arabidopsis thaliana	MYB binding site	stress-responsive
EVM0016720.1	MYC	CATTTG	1168	6	-	Arabidopsis thaliana	MYC binding site	stress-responsive
EVM0016720.1	MYC	CATTTG	1266	6	+	Arabidopsis thaliana	MYC binding site	stress-responsive
EVM0016720.1	MYB	CAACCA	1856	6	+	Arabidopsis thaliana	MYB binding site	stress-responsive
EVM0016720.1	MYC	CATTTG	1894	6	+	Arabidopsis thaliana	MYC binding site	stress-responsive
EVM0016720.1	MYB	CAACAG	1941	6	-	Arabidopsis thaliana	MYB binding site	stress-responsive
EVM0017725.1	MYB	CAACCA	133	6	-	Arabidopsis thaliana	MYB binding site	stress-responsive
EVM0017725.1	MYB	CAACAG	269	6	-	Arabidopsis thaliana	MYB binding site	stress-responsive
EVM0017725.1	MYB	CAACCA	326	6	+	Arabidopsis thaliana	MYB binding site	stress-responsive
EVM0017725.1	MYC	CATGTG	417	6	+	Arabidopsis thaliana	MYC binding site	stress-responsive
EVM0017725.1	MYC	CAATTG	1480	6	-	Arabidopsis thaliana	MYC binding site	stress-responsive
EVM0017725.1	MYC	CATTTG	1525	6	-	Arabidopsis thaliana	MYC binding site	stress-responsive
EVM0017725.1	MYB	CAACCA	1626	6	-	Arabidopsis thaliana	MYB binding site	stress-responsive
EVM0017725.1	MYB	CAACAG	1658	6	-	Arabidopsis thaliana	MYB binding site	stress-responsive
EVM0017725.1	MYB	CAACCA	1943	6	+	Arabidopsis thaliana	MYB binding site	stress-responsive
EVM0020914.1	MYC	CATGTG	681	6	-	Arabidopsis thaliana	MYC binding site	stress-responsive
EVM0020914.1	MYB	TAACCA	835	6	-	Arabidopsis thaliana	MYB binding site	stress-responsive
EVM0020914.1	MYB	CAACAG	1461	6	-	Arabidopsis thaliana	MYB binding site	stress-responsive
EVM0020914.1	MYC	CAATTG	1743	6	-	Arabidopsis thaliana	MYC binding site	stress-responsive

## Sheet: Table S4
Table S4. The expression level of 13 SOD genes in fruit transcriptome of A. trifoliata.
Gene name	FT-1	FT-2	FT-3	FT-4	ST-1	ST-2	ST-3	ST-4	RT-1	RT-2	RT-3	RT-4
AktCSD1	16.1814	23.4509	26.1983	17.0967	51.4543	39.0208	35.275	33.2425	18.3756	21.9792	22.0647	20.8473
AktCSD2	15.6086	15.6242	23.74	18.0514	4.9959	7.09458	8.779	9.98659	12.5209	15.2543	17.6299	13.7274
AktCSD3	302.341	335.965	150.801	38.1767	139.444	169.373	122.986	157.027	315.547	170.954	101.79	80.1808
AktCSD4	16.1917	25.3204	17.9484	12.1083	27.8712	29.0335	30.7438	25.5403	22.103	25.212	23.954	39.2666
AktCSD5	26.3518	19.7539	15.1922	22.4857	29.113	28.9837	32.6449	46.1254	29.412	17.9482	16.9031	21.283
AktCSD6	27.7698	62.6773	24.5494	2.93075	25.5551	31.1398	23.3728	21.6729	32.6024	33.0323	44.0486	55.4199
AktCSD7	0	0	0	0	0	0	0	0	0	0	0	0
AktFSD1	3.79945	5.69807	4.44606	1.02005	3.54641	4.29725	3.51523	4.98957	4.91697	4.80525	5.47248	3.74102
AktFSD2	7.75364	8.85605	9.34791	5.83307	6.69407	7.52363	7.39342	11.7766	8.64717	10.4344	10.3829	10.1497
AktMSD1	3.4667	3.46928	2.00944	0.314331	1.00498	2.30938	1.31593	1.78954	2.06321	3.47181	1.72482	0.53681
AktMSD2	0	0	0	0	0.00158533	0	0.000609667	0.03665	0	0	0	0
AktMSD3	0.00167367	0	0	0	0.0281033	0.0117473	0	0.000360667	0	0	0	0
AktMSD4	138.342	164.066	241.971	143.145	133.686	129.599	177.473	154.135	120.974	129.649	184.374	119.261

## Sheet: Table S5 
Table S5. List of genes expressed in association with AktSOD genes in the same module	List of genes expressed in association with AktSOD genes in the same module
fromNode	toNode	weight	fromNode	toNode	weight	fromNode	toNode	weight	fromNode	toNode	weight	fromNode	toNode	weight	fromNode	toNode	weight	fromNode	toNode	weight	fromNode	toNode	weight	fromNode	toNode	weight
EVM0015107	EVM0015215	0.0331249	EVM0003060	EVM0017083	0.100047	EVM0003123	EVM0016720	0.0677181	EVM0000641	EVM0017725	0.128062	EVM0011812	EVM0012624	0.138838	EVM0004711	EVM0004857	0.0385727	EVM0009170	EVM0019679	0.16626	EVM0011294	EVM0020658	0.0998707	EVM0014685	EVM0023570	0.153216
EVM0015107	EVM0015258	0.0088421	EVM0003060	EVM0016157	0.095694	EVM0002126	EVM0016720	0.0650984	EVM0004864	EVM0017725	0.118058	EVM0011812	EVM0018612	0.137841	EVM0004711	EVM0004904	0.033165	EVM0009170	EVM0010840	0.160975	EVM0011294	EVM0019679	0.0967893	EVM0014685	EVM0022095	0.149065
EVM0015107	EVM0015405	0.0304403	EVM0003060	EVM0016591	0.0937812	EVM0000202	EVM0016720	0.0637508	EVM0001561	EVM0017725	0.112332	EVM0011812	EVM0023157	0.137353	EVM0004711	EVM0004971	0.0369663	EVM0009170	EVM0009935	0.155604	EVM0011294	EVM0011500	0.0865742	EVM0014685	EVM0020826	0.14267
EVM0015107	EVM0015531	0.0823262	EVM0003060	EVM0016996	0.0931762	EVM0001282	EVM0016720	0.0628936	EVM0001587	EVM0017725	0.106072	EVM0011812	EVM0012824	0.135221	EVM0004711	EVM0005113	0.0540492	EVM0009170	EVM0010098	0.146526	EVM0011294	EVM0011891	0.0835026	EVM0014685	EVM0018272	0.133745
EVM0015107	EVM0015609	0.121273	EVM0003060	EVM0019050	0.0920014	EVM0002862	EVM0016720	0.0614056	EVM0001115	EVM0017725	0.105343	EVM0011812	EVM0020650	0.132208	EVM0004711	EVM0005195	0.0224093	EVM0009170	EVM0011500	0.144681	EVM0011294	EVM0019642	0.0795993	EVM0014685	EVM0023677	0.133146
EVM0015107	EVM0015931	0.0304192	EVM0003060	EVM0006810	0.0907654	EVM0004864	EVM0016720	0.0599007	EVM0003123	EVM0017725	0.103152	EVM0011812	EVM0022670	0.127275	EVM0004711	EVM0005286	0.0446404	EVM0009170	EVM0010148	0.141421	EVM0011294	EVM0023593	0.0793432	EVM0014685	EVM0023313	0.13297
EVM0015107	EVM0016162	0.0103875	EVM0003060	EVM0014490	0.0902298	EVM0002774	EVM0016720	0.0592846	EVM0002552	EVM0017725	0.0976834	EVM0011812	EVM0019659	0.121544	EVM0004711	EVM0005325	0.0225526	EVM0009170	EVM0019642	0.140414	EVM0011294	EVM0012142	0.0778535	EVM0014685	EVM0017226	0.125076
EVM0015107	EVM0016370	0.0157531	EVM0003060	EVM0020040	0.089081	EVM0000641	EVM0016720	0.0582671	EVM0002418	EVM0017725	0.0975454	EVM0011812	EVM0016496	0.119961	EVM0004711	EVM0005436	0.0399217	EVM0009170	EVM0023593	0.137287	EVM0011294	EVM0021211	0.0776679	EVM0014685	EVM0014722	0.123787
EVM0015107	EVM0016401	0.000601456	EVM0003060	EVM0020138	0.0889655	EVM0002496	EVM0016720	0.0576898	EVM0005066	EVM0017725	0.0948238	EVM0011812	EVM0017438	0.114201	EVM0004711	EVM0005479	0.0486277	EVM0009170	EVM0011891	0.136879	EVM0011294	EVM0021148	0.0749313	EVM0014685	EVM0016476	0.122449
EVM0015107	EVM0016635	0.0199473	EVM0003060	EVM0010044	0.0886849	EVM0001561	EVM0016720	0.0558829	EVM0003631	EVM0017725	0.0946488	EVM0011812	EVM0012544	0.113375	EVM0004711	EVM0005563	0.0273086	EVM0009170	EVM0021148	0.132624	EVM0011294	EVM0016965	0.0730108	EVM0014685	EVM0016002	0.116779
EVM0015107	EVM0016741	0.025698	EVM0003060	EVM0018101	0.088437	EVM0004572	EVM0016720	0.0551052	EVM0003752	EVM0017725	0.0943077	EVM0011812	EVM0022444	0.106892	EVM0004711	EVM0005580	0.0212478	EVM0009170	EVM0015172	0.131432	EVM0011294	EVM0016930	0.0717399	EVM0014685	EVM0021278	0.115514
EVM0015107	EVM0017052	0.0628436	EVM0003060	EVM0017789	0.0883844	EVM0002559	EVM0016720	0.0542197	EVM0001282	EVM0017725	0.0940899	EVM0011812	EVM0021726	0.106788	EVM0004711	EVM0005625	0.0492485	EVM0009170	EVM0014259	0.128339	EVM0011294	EVM0014259	0.0715919	EVM0014685	EVM0018370	0.110458
EVM0015107	EVM0017075	0.0828308	EVM0003060	EVM0006112	0.0881621	EVM0003227	EVM0016720	0.0515729	EVM0000708	EVM0017725	0.0926889	EVM0011812	EVM0012321	0.0976229	EVM0004711	EVM0005651	0.0623299	EVM0009170	EVM0009587	0.126005	EVM0011294	EVM0017964	0.0714039	EVM0014685	EVM0021302	0.1093
EVM0015107	EVM0017420	0.0540768	EVM0003060	EVM0004864	0.0879933	EVM0001643	EVM0016720	0.0512824	EVM0002314	EVM0017725	0.0918034	EVM0011812	EVM0022903	0.0968371	EVM0004711	EVM0005673	0.0243474	EVM0009170	EVM0021211	0.123747	EVM0011294	EVM0022906	0.070637	EVM0014685	EVM0019886	0.108118
EVM0015107	EVM0017903	0.00260386	EVM0003060	EVM0019196	0.0878264	EVM0004780	EVM0016720	0.0499069	EVM0000418	EVM0017725	0.0911812	EVM0011812	EVM0013271	0.0964931	EVM0004711	EVM0005707	0.0216617	EVM0009170	EVM0013879	0.122073	EVM0011294	EVM0013680	0.0689368	EVM0014685	EVM0019089	0.102701
EVM0015107	EVM0018085	0.0122633	EVM0003060	EVM0008812	0.0864538	EVM0001336	EVM0016720	0.0492166	EVM0004320	EVM0017725	0.0883024	EVM0011812	EVM0013296	0.0941197	EVM0004711	EVM0005753	0.0220769	EVM0009170	EVM0015123	0.120165	EVM0011294	EVM0022871	0.0658819	EVM0014685	EVM0017817	0.0936208
EVM0015107	EVM0018092	0.0304686	EVM0003060	EVM0004320	0.0862619	EVM0003631	EVM0016720	0.0485084	EVM0001368	EVM0017725	0.0873671	EVM0011812	EVM0012962	0.09402	EVM0004711	EVM0005840	0.0315162	EVM0009170	EVM0013071	0.114551	EVM0011294	EVM0020216	0.0645179	EVM0014685	EVM0019911	0.0873918
EVM0015107	EVM0018118	0.0228844	EVM0003060	EVM0007014	0.086251	EVM0000435	EVM0016720	0.0477768	EVM0004566	EVM0017725	0.0866996	EVM0011812	EVM0018089	0.0885924	EVM0004711	EVM0005861	0.0258278	EVM0009170	EVM0017467	0.109633	EVM0011294	EVM0023613	0.0633929	EVM0014685	EVM0023269	0.0861984
EVM0015107	EVM0018160	0.0314462	EVM0003060	EVM0007761	0.085678	EVM0002314	EVM0016720	0.0469263	EVM0003630	EVM0017725	0.086085	EVM0011812	EVM0019703	0.086971	EVM0004711	EVM0005923	0.0297368	EVM0009170	EVM0020658	0.108521	EVM0011294	EVM0013879	0.0625017	EVM0014685	EVM0020408	0.0853752
EVM0015107	EVM0018779	0.0221379	EVM0003060	EVM0003123	0.085462	EVM0001587	EVM0016720	0.0462208	EVM0002835	EVM0017725	0.0856547	EVM0011812	EVM0021102	0.0865376	EVM0004711	EVM0006093	0.0330047	EVM0009170	EVM0012142	0.107143	EVM0011294	EVM0012692	0.0620527	EVM0014685	EVM0021787	0.0848609
EVM0015107	EVM0018812	0.0772039	EVM0003060	EVM0010100	0.0853051	EVM0004658	EVM0016720	0.0460714	EVM0002011	EVM0017725	0.0854429	EVM0011812	EVM0014211	0.0858396	EVM0004711	EVM0006301	0.0417045	EVM0009170	EVM0020216	0.103547	EVM0011294	EVM0018534	0.0618828	EVM0014685	EVM0023310	0.0835948
EVM0015107	EVM0018858	0.0085196	EVM0003060	EVM0022867	0.0852284	EVM0000708	EVM0016720	0.0456846	EVM0002301	EVM0017725	0.0850802	EVM0011812	EVM0016269	0.084793	EVM0004711	EVM0006368	0.0372342	EVM0009170	EVM0018534	0.10079	EVM0011294	EVM0019439	0.0618753	EVM0014685	EVM0015489	0.0832032
EVM0015107	EVM0018870	0.0553302	EVM0003060	EVM0003752	0.0838842	EVM0000801	EVM0016720	0.0452737	EVM0002968	EVM0017725	0.0845088	EVM0011812	EVM0015050	0.0800348	EVM0004711	EVM0006742	0.038714	EVM0009170	EVM0012692	0.100417	EVM0011294	EVM0015172	0.0618605	EVM0014685	EVM0017241	0.0814289
EVM0015107	EVM0019245	0.0190586	EVM0003060	EVM0008148	0.0836274	EVM0001115	EVM0016720	0.0439667	EVM0004009	EVM0017725	0.0841643	EVM0011812	EVM0013505	0.0683907	EVM0004711	EVM0006749	0.0213785	EVM0009170	EVM0016632	0.097932	EVM0011294	EVM0023005	0.0617205	EVM0014685	EVM0018868	0.0792201
EVM0015107	EVM0019455	0.0332798	EVM0003060	EVM0016131	0.0835494	EVM0004234	EVM0016720	0.0434705	EVM0003498	EVM0017725	0.0811477	EVM0011812	EVM0014632	0.0637658	EVM0004711	EVM0006778	0.0467503	EVM0009170	EVM0011898	0.0973482	EVM0011294	EVM0015123	0.0610233	EVM0014685	EVM0023901	0.0778849
EVM0015107	EVM0019822	0.0184943	EVM0003060	EVM0003631	0.0834466	EVM0004320	EVM0016720	0.0426339	EVM0002559	EVM0017725	0.080765	EVM0011812	EVM0016296	0.0622964	EVM0004711	EVM0006855	0.0351737	EVM0009170	EVM0012960	0.0970886	EVM0011294	EVM0013071	0.0609335	EVM0014685	EVM0023471	0.0773558
EVM0015107	EVM0019985	0.0141354	EVM0003060	EVM0016503	0.0824571	EVM0003023	EVM0016720	0.0421518	EVM0002914	EVM0017725	0.0793369	EVM0011812	EVM0020486	0.061457	EVM0004711	EVM0006865	0.031837	EVM0009170	EVM0023613	0.095601	EVM0011294	EVM0017467	0.0601374	EVM0014685	EVM0019879	0.0769269
EVM0015107	EVM0020025	0.0586849	EVM0003060	EVM0008152	0.0817771	EVM0001466	EVM0016720	0.041539	EVM0002496	EVM0017725	0.0788508	EVM0011812	EVM0020233	0.0600343	EVM0004711	EVM0007031	0.0502626	EVM0009170	EVM0013247	0.0923379	EVM0011294	EVM0017474	0.0589741	EVM0014685	EVM0019190	0.0756116
EVM0015107	EVM0020189	0.0148944	EVM0003060	EVM0010147	0.081719	EVM0003630	EVM0016720	0.04082	EVM0001703	EVM0017725	0.0788156	EVM0011812	EVM0013878	0.0598387	EVM0004711	EVM0007210	0.0208456	EVM0009170	EVM0013112	0.0908867	EVM0011294	EVM0012960	0.0586815	EVM0014685	EVM0023327	0.0743159
EVM0015107	EVM0020290	0.00901868	EVM0003060	EVM0016864	0.080989	EVM0003937	EVM0016720	0.0407337	EVM0002310	EVM0017725	0.0766761	EVM0011812	EVM0020131	0.059594	EVM0004711	EVM0007255	0.0425943	EVM0009170	EVM0017964	0.090416	EVM0011294	EVM0013708	0.0584507	EVM0014685	EVM0018350	0.0727557
EVM0015107	EVM0020553	0.0160241	EVM0003060	EVM0014120	0.0801785	EVM0004736	EVM0016720	0.0406038	EVM0004780	EVM0017725	0.0763048	EVM0011812	EVM0016796	0.0591663	EVM0004711	EVM0007265	0.0227086	EVM0009170	EVM0023005	0.0898746	EVM0011294	EVM0011578	0.0575411	EVM0014685	EVM0020437	0.0688353
EVM0015107	EVM0020805	0.00846154	EVM0003060	EVM0020590	0.0787059	EVM0004919	EVM0016720	0.0404284	EVM0003614	EVM0017725	0.075712	EVM0011812	EVM0013328	0.0567935	EVM0004711	EVM0007312	0.039263	EVM0009170	EVM0017474	0.0898453	EVM0011294	EVM0022329	0.0570537	EVM0014685	EVM0016975	0.0684227
EVM0015107	EVM0021031	0.0475363	EVM0003060	EVM0004572	0.0775606	EVM0004566	EVM0016720	0.039721	EVM0000668	EVM0017725	0.0750862	EVM0011812	EVM0023683	0.0535404	EVM0004711	EVM0007489	0.0446111	EVM0009170	EVM0009391	0.0897286	EVM0011294	EVM0021773	0.05701	EVM0014685	EVM0015625	0.0645375
EVM0015107	EVM0021080	0.0753592	EVM0003060	EVM0017047	0.0772639	EVM0002552	EVM0016720	0.0395799	EVM0004572	EVM0017725	0.0748667	EVM0011812	EVM0015897	0.0531602	EVM0004711	EVM0007491	0.0214585	EVM0009170	EVM0011011	0.0892633	EVM0011294	EVM0021649	0.0568796	EVM0014685	EVM0019562	0.0645018
EVM0015107	EVM0021311	0.0515068	EVM0003060	EVM0023696	0.0767917	EVM0000418	EVM0016720	0.0389834	EVM0001931	EVM0017725	0.0745477	EVM0011812	EVM0020398	0.0524798	EVM0004711	EVM0007494	0.0339056	EVM0009170	EVM0019439	0.0876436	EVM0011294	EVM0022809	0.0564815	EVM0014685	EVM0022354	0.0626414
EVM0015107	EVM0021525	0.0652254	EVM0003060	EVM0009939	0.0766857	EVM0002062	EVM0016720	0.0389171	EVM0002627	EVM0017725	0.0739523	EVM0011812	EVM0016919	0.0494915	EVM0004711	EVM0007497	0.0213415	EVM0009170	EVM0023375	0.0861913	EVM0011294	EVM0015062	0.0549136	EVM0014685	EVM0016762	0.0621611
EVM0015107	EVM0021972	0.00466109	EVM0003060	EVM0006694	0.0757201	EVM0003752	EVM0016720	0.0387311	EVM0001643	EVM0017725	0.0738064	EVM0011812	EVM0014876	0.0487998	EVM0004711	EVM0007508	0.0306725	EVM0009170	EVM0021997	0.0854723	EVM0011294	EVM0011375	0.0547361	EVM0014685	EVM0018104	0.0611042
EVM0015107	EVM0022041	0.0410328	EVM0003060	EVM0011596	0.0750333	EVM0002788	EVM0016720	0.038411	EVM0004782	EVM0017725	0.0737559	EVM0011812	EVM0012481	0.0473658	EVM0004711	EVM0007636	0.0239687	EVM0009170	EVM0017517	0.0846597	EVM0011294	EVM0022714	0.0538507	EVM0014685	EVM0015553	0.0606315
EVM0015107	EVM0022044	0.00788755	EVM0003060	EVM0007330	0.0749343	EVM0002627	EVM0016720	0.038204	EVM0000899	EVM0017725	0.0733423	EVM0011812	EVM0019182	0.0464991	EVM0004711	EVM0007806	0.0498064	EVM0009170	EVM0011869	0.0831791	EVM0011294	EVM0017517	0.0535538	EVM0014685	EVM0023626	0.0597172
EVM0015107	EVM0022251	0.0713297	EVM0003060	EVM0009806	0.074619	EVM0003170	EVM0016720	0.0380131	EVM0002862	EVM0017725	0.0721361	EVM0011812	EVM0015290	0.0463711	EVM0004711	EVM0007836	0.0469038	EVM0009170	EVM0021157	0.082769	EVM0011294	EVM0021157	0.0531536	EVM0014685	EVM0017534	0.0596587
EVM0015107	EVM0022297	0.0137337	EVM0003060	EVM0013192	0.0739822	EVM0004450	EVM0016720	0.0376105	EVM0000995	EVM0017725	0.0719988	EVM0011812	EVM0019755	0.0458252	EVM0004711	EVM0007845	0.0362678	EVM0009170	EVM0022871	0.0814187	EVM0011294	EVM0012621	0.0527017	EVM0014685	EVM0016055	0.0594852
EVM0015107	EVM0022428	0.0539574	EVM0003060	EVM0012637	0.0736567	EVM0002418	EVM0016720	0.0373604	EVM0004450	EVM0017725	0.0708664	EVM0011812	EVM0022440	0.0444394	EVM0004711	EVM0007864	0.0370875	EVM0009170	EVM0013456	0.0814067	EVM0011294	EVM0018184	0.0524878	EVM0014685	EVM0017406	0.0594826
EVM0015107	EVM0022516	0.0907803	EVM0003060	EVM0008393	0.0735751	EVM0002113	EVM0016720	0.0370044	EVM0000172	EVM0017725	0.0692213	EVM0011812	EVM0013758	0.0435496	EVM0004711	EVM0007929	0.0381996	EVM0009170	EVM0022906	0.0810215	EVM0011294	EVM0021997	0.0522672	EVM0014685	EVM0019255	0.0593048
EVM0015107	EVM0022540	0.0744346	EVM0003060	EVM0006536	0.0734339	EVM0001908	EVM0016720	0.0369654	EVM0000104	EVM0017725	0.0689024	EVM0011812	EVM0015465	0.0432623	EVM0004711	EVM0008259	0.0454616	EVM0009170	EVM0016757	0.080066	EVM0011294	EVM0016316	0.0518509	EVM0014685	EVM0016140	0.059291
EVM0015107	EVM0022634	0.0037991	EVM0003060	EVM0023479	0.0724813	EVM0002913	EVM0016720	0.036663	EVM0003146	EVM0017725	0.0687455	EVM0011812	EVM0021902	0.0388889	EVM0004711	EVM0008352	0.0413278	EVM0009170	EVM0011578	0.0796775	EVM0011294	EVM0018305	0.0518316	EVM0014685	EVM0018637	0.058581
EVM0015107	EVM0022660	0.0345683	EVM0003060	EVM0009606	0.072413	EVM0000857	EVM0016720	0.0362695	EVM0001908	EVM0017725	0.0679885	EVM0011812	EVM0014940	0.0385871	EVM0004711	EVM0008484	0.0201251	EVM0009170	EVM0009598	0.079319	EVM0011294	EVM0023031	0.051367	EVM0014685	EVM0021745	0.0578486
EVM0015107	EVM0022734	0.0409256	EVM0003060	EVM0015515	0.0721801	EVM0003614	EVM0016720	0.0355673	EVM0003545	EVM0017725	0.0678832	EVM0011812	EVM0015040	0.0384908	EVM0004711	EVM0008607	0.0334133	EVM0009170	EVM0017320	0.0785944	EVM0011294	EVM0022860	0.0507202	EVM0014685	EVM0021034	0.0574642
EVM0015107	EVM0022795	0.0193408	EVM0003060	EVM0020053	0.0720273	EVM0002835	EVM0016720	0.0349866	EVM0004322	EVM0017725	0.0666366	EVM0011812	EVM0020349	0.0384657	EVM0004711	EVM0008609	0.0232748	EVM0009170	EVM0021773	0.0781966	EVM0011294	EVM0014505	0.0499754	EVM0014685	EVM0020568	0.0574484
EVM0015107	EVM0022821	0.0157979	EVM0003060	EVM0022080	0.0718031	EVM0002301	EVM0016720	0.0349283	EVM0002126	EVM0017725	0.0666001	EVM0011812	EVM0019326	0.0380912	EVM0004711	EVM0008611	0.0317867	EVM0009170	EVM0014404	0.0779726	EVM0011294	EVM0023183	0.0491553	EVM0014685	EVM0023764	0.0560411
EVM0015107	EVM0023260	0.0496661	EVM0003060	EVM0009446	0.0716518	EVM0000668	EVM0016720	0.0335153	EVM0000262	EVM0017725	0.0661941	EVM0011812	EVM0022928	0.0380797	EVM0004711	EVM0008666	0.0339895	EVM0009170	EVM0015129	0.0771966	EVM0011294	EVM0017998	0.0485033	EVM0014685	EVM0022314	0.0557462
EVM0015107	EVM0023521	0.0629626	EVM0003060	EVM0020509	0.0714463	EVM0004102	EVM0016720	0.0334583	EVM0002848	EVM0017725	0.0655766	EVM0011812	EVM0022478	0.0379838	EVM0004711	EVM0008775	0.0375465	EVM0009170	EVM0023183	0.0770616	EVM0011294	EVM0016632	0.0483467	EVM0014685	EVM0019076	0.0555407
EVM0015107	EVM0023592	0.0394455	EVM0003060	EVM0011595	0.0704643	EVM0002968	EVM0016720	0.0330889	EVM0003937	EVM0017725	0.0628673	EVM0011812	EVM0013089	0.03737	EVM0004711	EVM0008966	0.0201503	EVM0009170	EVM0015062	0.0765522	EVM0011294	EVM0022602	0.0479922	EVM0014685	EVM0017598	0.0552427
EVM0015107	EVM0023601	0.0156783	EVM0003060	EVM0004780	0.0704495	EVM0005066	EVM0016720	0.0325369	EVM0001336	EVM0017725	0.0616867	EVM0011812	EVM0017515	0.0367144	EVM0004711	EVM0009216	0.0398603	EVM0009170	EVM0017670	0.0753391	EVM0011294	EVM0012005	0.0477461	EVM0014685	EVM0023690	0.0551282
EVM0015107	EVM0023624	0.125317	EVM0003060	EVM0021624	0.0695882	EVM0004773	EVM0016720	0.0323119	EVM0003262	EVM0017725	0.0609042	EVM0011812	EVM0023138	0.0349149	EVM0004711	EVM0009217	0.0275648	EVM0009170	EVM0015983	0.0745431	EVM0011294	EVM0017670	0.0466509	EVM0014685	EVM0023830	0.0549765
EVM0015107	EVM0023669	0.00956905	EVM0003060	EVM0008803	0.0694935	EVM0001829	EVM0016720	0.0322006	EVM0004903	EVM0017725	0.0607813	EVM0011812	EVM0020435	0.0343428	EVM0004711	EVM0009309	0.023598	EVM0009170	EVM0022329	0.0744686	EVM0011294	EVM0013456	0.0463535	EVM0014685	EVM0018050	0.0546009
EVM0015107	EVM0023735	0.0878177	EVM0003060	EVM0011934	0.0685625	EVM0004903	EVM0016720	0.0319669	EVM0003345	EVM0017725	0.0586036	EVM0011812	EVM0019192	0.0342456	EVM0004711	EVM0009311	0.0333646	EVM0009170	EVM0012005	0.0718851	EVM0011294	EVM0011898	0.0461686	EVM0014685	EVM0021651	0.0543725
EVM0015107	EVM0023827	0.0267246	EVM0003060	EVM0022791	0.0685059	EVM0003165	EVM0016720	0.0319326	EVM0004736	EVM0017725	0.0582342	EVM0011812	EVM0012820	0.033337	EVM0004711	EVM0009439	0.026015	EVM0009170	EVM0023031	0.0717693	EVM0011294	EVM0023927	0.0459789	EVM0014685	EVM0022222	0.0543266
EVM0015107	EVM0024085	0.0148963	EVM0003060	EVM0010559	0.0684358	EVM0002914	EVM0016720	0.0316768	EVM0003516	EVM0017725	0.0579615	EVM0011812	EVM0023391	0.0328397	EVM0004711	EVM0009604	0.020833	EVM0009170	EVM0012044	0.0716463	EVM0011294	EVM0023375	0.0454671	EVM0014685	EVM0018126	0.0542897
EVM0015107	EVM0024101	0.017181	EVM0003060	EVM0009041	0.0683573	EVM0001368	EVM0016720	0.0316028	EVM0002016	EVM0017725	0.0578112	EVM0011812	EVM0015828	0.0321722	EVM0004711	EVM0009778	0.0215898	EVM0009170	EVM0019172	0.0708938	EVM0011294	EVM0012620	0.0453233	EVM0014685	EVM0022598	0.0540151
			EVM0003060	EVM0020933	0.0682629	EVM0001050	EVM0016720	0.0312788	EVM0003640	EVM0017725	0.057238	EVM0011812	EVM0022729	0.0300341	EVM0004711	EVM0009994	0.021451	EVM0009170	EVM0013590	0.0706993	EVM0011294	EVM0017250	0.0450288	EVM0014685	EVM0022796	0.0535417
			EVM0003060	EVM0018407	0.0680715	EVM0002310	EVM0016720	0.031217	EVM0004917	EVM0017725	0.0564273	EVM0011812	EVM0015761	0.0289143	EVM0004711	EVM0010047	0.0363312	EVM0009170	EVM0017250	0.0705749	EVM0011294	EVM0019172	0.0449164	EVM0014685	EVM0021731	0.0529681
			EVM0003060	EVM0021457	0.0676716	EVM0000194	EVM0016720	0.0307412	EVM0001091	EVM0017725	0.0549534	EVM0011812	EVM0018942	0.0287893	EVM0004711	EVM0010103	0.0232564	EVM0009170	EVM0019743	0.0702589	EVM0011294	EVM0020430	0.0447871	EVM0014685	EVM0017291	0.0528512
			EVM0003060	EVM0014240	0.0676131	EVM0004782	EVM0016720	0.0307191	EVM0001063	EVM0017725	0.0542338	EVM0011812	EVM0019170	0.0286792	EVM0004711	EVM0010121	0.020856	EVM0009170	EVM0023338	0.0702419	EVM0011294	EVM0013247	0.0447473	EVM0014685	EVM0018069	0.0523915
			EVM0003060	EVM0014524	0.0675722	EVM0001063	EVM0016720	0.0305379	EVM0003023	EVM0017725	0.0535791	EVM0011812	EVM0012216	0.0285032	EVM0004711	EVM0010131	0.0392245	EVM0009170	EVM0011375	0.0697125	EVM0011294	EVM0011869	0.0445072	EVM0014685	EVM0023754	0.0523895
			EVM0003060	EVM0016480	0.0672928	EVM0004459	EVM0016720	0.0303583	EVM0000932	EVM0017725	0.053152	EVM0011812	EVM0012286	0.0280069	EVM0004711	EVM0010151	0.0278465	EVM0009170	EVM0012621	0.0697075	EVM0011294	EVM0017320	0.0443977	EVM0014685	EVM0020252	0.0522334
			EVM0003060	EVM0009112	0.0671441	EVM0004009	EVM0016720	0.0301105	EVM0002528	EVM0017725	0.0526997	EVM0011812	EVM0016825	0.0278674	EVM0004711	EVM0010188	0.0336538	EVM0009170	EVM0018184	0.0689237	EVM0011294	EVM0019743	0.0434347	EVM0014685	EVM0015855	0.0521663
			EVM0003060	EVM0009089	0.0669226	EVM0001272	EVM0016720	0.0293436	EVM0000202	EVM0017725	0.0522543	EVM0011812	EVM0018235	0.0277116	EVM0004711	EVM0010234	0.0294232	EVM0009170	EVM0010513	0.0686429	EVM0011294	EVM0013112	0.0420219	EVM0014685	EVM0023259	0.0518043
			EVM0003060	EVM0018465	0.0666931	EVM0002848	EVM0016720	0.0291358	EVM0004054	EVM0017725	0.0522271	EVM0011812	EVM0023848	0.0268829	EVM0004711	EVM0010312	0.0544847	EVM0009170	EVM0013680	0.0685682	EVM0011294	EVM0013590	0.0419045	EVM0014685	EVM0017568	0.0514493
			EVM0003060	EVM0004322	0.0665798	EVM0002165	EVM0016720	0.0290431	EVM0001446	EVM0017725	0.0520631	EVM0011812	EVM0013750	0.0263829	EVM0004711	EVM0010425	0.039727	EVM0009170	EVM0011079	0.0682659	EVM0011294	EVM0012559	0.0418196	EVM0014685	EVM0020645	0.0488406
			EVM0003060	EVM0011328	0.0665671	EVM0003766	EVM0016720	0.0288183	EVM0004459	EVM0017725	0.0520211	EVM0011812	EVM0016069	0.0258012	EVM0004711	EVM0010466	0.0305768	EVM0009170	EVM0021380	0.0675005	EVM0011294	EVM0023338	0.041669	EVM0014685	EVM0016971	0.0483961
			EVM0003060	EVM0023125	0.0665225	EVM0005125	EVM0016720	0.0286074	EVM0002994	EVM0017725	0.0515568	EVM0011812	EVM0012772	0.0254207	EVM0004711	EVM0010477	0.0475756	EVM0009170	EVM0013708	0.0671335	EVM0011294	EVM0011505	0.0413224	EVM0014685	EVM0017548	0.0476607
			EVM0003060	EVM0016422	0.0664807	EVM0004455	EVM0016720	0.0284771	EVM0002930	EVM0017725	0.0510541	EVM0011812	EVM0019584	0.0253123	EVM0004711	EVM0010558	0.0465127	EVM0009170	EVM0024090	0.0662947	EVM0011294	EVM0019036	0.040461	EVM0014685	EVM0019976	0.0472233
			EVM0003060	EVM0019531	0.0664805	EVM0003977	EVM0016720	0.028336	EVM0000086	EVM0017725	0.050539	EVM0011812	EVM0020407	0.0249426	EVM0004711	EVM0010620	0.0302757	EVM0009170	EVM0018305	0.0654837	EVM0011294	EVM0014828	0.0400102	EVM0014685	EVM0018752	0.046753
			EVM0003060	EVM0020733	0.0664679	EVM0003146	EVM0016720	0.0281847	EVM0000194	EVM0017725	0.0504994	EVM0011812	EVM0018142	0.0245066	EVM0004711	EVM0010767	0.0208253	EVM0009170	EVM0022809	0.0649063	EVM0011294	EVM0014389	0.0399292	EVM0014685	EVM0018270	0.0465287
			EVM0003060	EVM0009579	0.066326	EVM0004322	EVM0016720	0.0279382	EVM0000161	EVM0017725	0.0501154	EVM0011812	EVM0011843	0.0228082	EVM0004711	EVM0010902	0.0247834	EVM0009170	EVM0010111	0.0648585	EVM0011294	EVM0024029	0.0393008	EVM0014685	EVM0023630	0.0464735
			EVM0003060	EVM0009014	0.0662754	EVM0002011	EVM0016720	0.0277202	EVM0002062	EVM0017725	0.050109	EVM0011812	EVM0023044	0.0227247	EVM0004711	EVM0011197	0.0233499	EVM0009170	EVM0022602	0.0648143	EVM0011294	EVM0016658	0.0388484	EVM0014685	EVM0022793	0.0450722
			EVM0003060	EVM0018306	0.0660322	EVM0003545	EVM0016720	0.0276876	EVM0002541	EVM0017725	0.0496371	EVM0011812	EVM0012607	0.0226632	EVM0004711	EVM0011210	0.0206604	EVM0009170	EVM0016965	0.0647609	EVM0011294	EVM0023836	0.0387464	EVM0014685	EVM0021443	0.045033
			EVM0003060	EVM0021041	0.0658505	EVM0001703	EVM0016720	0.027506	EVM0002113	EVM0017725	0.0493964	EVM0011812	EVM0016861	0.0194033	EVM0004711	EVM0011254	0.0260765	EVM0009170	EVM0023146	0.0642312	EVM0011294	EVM0018301	0.0386343	EVM0014685	EVM0022593	0.0445658
			EVM0003060	EVM0009928	0.0656739	EVM0000172	EVM0016720	0.027479	EVM0001690	EVM0017725	0.0493045	EVM0011812	EVM0022120	0.0193533	EVM0004711	EVM0011345	0.0549172	EVM0009170	EVM0022965	0.0641221	EVM0011294	EVM0014246	0.0383899	EVM0014685	EVM0022969	0.0431036
			EVM0003060	EVM0017094	0.0654638	EVM0004878	EVM0016720	0.0270545	EVM0004432	EVM0017725	0.0487549	EVM0011812	EVM0015695	0.0191783	EVM0004711	EVM0011391	0.0500155	EVM0009170	EVM0009218	0.0638407	EVM0011294	EVM0021380	0.0383355	EVM0014685	EVM0021358	0.0430418
			EVM0003060	EVM0023973	0.0651956	EVM0000899	EVM0016720	0.0270143	EVM0001664	EVM0017725	0.0482919	EVM0011812	EVM0018597	0.0174402	EVM0004711	EVM0011399	0.0298482	EVM0009170	EVM0022714	0.0636673	EVM0011294	EVM0023349	0.0378378	EVM0014685	EVM0021486	0.0428087
			EVM0003060	EVM0007505	0.0648142	EVM0003387	EVM0016720	0.0269393	EVM0002969	EVM0017725	0.0482065	EVM0011812	EVM0012890	0.0169385	EVM0004711	EVM0011453	0.0307831	EVM0009170	EVM0017421	0.0627881	EVM0011294	EVM0022735	0.0377023	EVM0014685	EVM0015851	0.0427919
			EVM0003060	EVM0014978	0.0646375	EVM0003370	EVM0016720	0.0267349	EVM0004455	EVM0017725	0.0480597	EVM0011812	EVM0017658	0.016574	EVM0004711	EVM0011755	0.032422	EVM0009170	EVM0023836	0.0627713	EVM0011294	EVM0014404	0.0375013	EVM0014685	EVM0019016	0.0413971
			EVM0003060	EVM0021593	0.0644965	EVM0004741	EVM0016720	0.0267254	EVM0001733	EVM0017725	0.0479082	EVM0011812	EVM0017378	0.0148999	EVM0004711	EVM0011769	0.0488206	EVM0009170	EVM0022860	0.0624345	EVM0011294	EVM0020303	0.0373943	EVM0014685	EVM0023801	0.0412977
			EVM0003060	EVM0019894	0.0644374	EVM0005095	EVM0016720	0.0267234	EVM0002373	EVM0017725	0.0476177	EVM0011812	EVM0016525	0.0144943	EVM0004711	EVM0011877	0.0264952	EVM0009170	EVM0021649	0.0618912	EVM0011294	EVM0012741	0.0373109	EVM0014685	EVM0017307	0.041275
			EVM0003060	EVM0009324	0.0642684	EVM0003498	EVM0016720	0.0264955	EVM0003387	EVM0017725	0.0469993	EVM0011812	EVM0022794	0.0143879	EVM0004711	EVM0011984	0.0259434	EVM0009170	EVM0018194	0.0612561	EVM0011294	EVM0018986	0.0369624	EVM0014685	EVM0018333	0.0411302
			EVM0003060	EVM0006169	0.0640663	EVM0003777	EVM0016720	0.0264934	EVM0004603	EVM0017725	0.0460723	EVM0011812	EVM0013638	0.0132604	EVM0004711	EVM0012100	0.021127	EVM0009170	EVM0017998	0.061171	EVM0011294	EVM0020639	0.0368684	EVM0014685	EVM0023057	0.0404744
			EVM0003060	EVM0015312	0.0638444	EVM0001427	EVM0016720	0.0264188	EVM0002595	EVM0017725	0.0458483	EVM0011812	EVM0020151	0.0121313	EVM0004711	EVM0012156	0.0402301	EVM0009170	EVM0011160	0.0605659	EVM0011294	EVM0021603	0.0367015	EVM0014685	EVM0015434	0.0399846
			EVM0003060	EVM0014362	0.0633791	EVM0002897	EVM0016720	0.0260944	EVM0002691	EVM0017725	0.0453865	EVM0011812	EVM0023907	0.0121297	EVM0004711	EVM0012422	0.0324124	EVM0009170	EVM0012620	0.0603797	EVM0011294	EVM0016757	0.0364436	EVM0014685	EVM0022171	0.0396685
			EVM0003060	EVM0010184	0.0633627	EVM0001468	EVM0016720	0.0260551	EVM0003169	EVM0017725	0.0450136	EVM0011812	EVM0016551	0.0117523	EVM0004711	EVM0012496	0.0257699	EVM0009170	EVM0023834	0.0594577	EVM0011294	EVM0023625	0.0361323	EVM0014685	EVM0023882	0.0393475
			EVM0003060	EVM0007684	0.0631899	EVM0001931	EVM0016720	0.0257207	EVM0001785	EVM0017725	0.0449129	EVM0011812	EVM0019052	0.0108366	EVM0004711	EVM0012600	0.0551516	EVM0009170	EVM0021603	0.0590789	EVM0011294	EVM0019449	0.036041	EVM0014685	EVM0014956	0.0391258
			EVM0003060	EVM0007602	0.0631689	EVM0002016	EVM0016720	0.0256963	EVM0001394	EVM0017725	0.0446593	EVM0011812	EVM0018012	0.010441	EVM0004711	EVM0012642	0.0332514	EVM0009170	EVM0023625	0.0580325	EVM0011294	EVM0022573	0.0358475	EVM0014685	EVM0022153	0.0390822
			EVM0003060	EVM0021104	0.0628132	EVM0000262	EVM0016720	0.0255251	EVM0002358	EVM0017725	0.0439825				EVM0004711	EVM0013047	0.0434541	EVM0009170	EVM0022566	0.057979	EVM0011294	EVM0017815	0.0357986	EVM0014685	EVM0019691	0.0385775
			EVM0003060	EVM0022754	0.0627732	EVM0001394	EVM0016720	0.0254262	EVM0004878	EVM0017725	0.0439309				EVM0004711	EVM0013057	0.0209473	EVM0009170	EVM0009736	0.0577607	EVM0011294	EVM0022965	0.0356167	EVM0014685	EVM0016227	0.0384731
			EVM0003060	EVM0005066	0.0625876	EVM0003320	EVM0016720	0.025298	EVM0002788	EVM0017725	0.0431473				EVM0004711	EVM0013160	0.0366514	EVM0009170	EVM0016392	0.0569279	EVM0011294	EVM0015983	0.034878	EVM0014685	EVM0016622	0.0383363
			EVM0003060	EVM0018632	0.0625163	EVM0003144	EVM0016720	0.0251032	EVM0004094	EVM0017725	0.0428834				EVM0004711	EVM0013179	0.0360164	EVM0009170	EVM0019036	0.056609	EVM0011294	EVM0016249	0.0346907	EVM0014685	EVM0017145	0.0382508
			EVM0003060	EVM0013481	0.0621661	EVM0002980	EVM0016720	0.0249179	EVM0003370	EVM0017725	0.0420909				EVM0004711	EVM0013444	0.0382829	EVM0009170	EVM0011505	0.0556676	EVM0011294	EVM0015129	0.0344322	EVM0014685	EVM0016920	0.0375609
			EVM0003060	EVM0006820	0.0620968	EVM0000192	EVM0016720	0.0248248	EVM0003750	EVM0017725	0.0409935				EVM0004711	EVM0013710	0.0238348	EVM0009170	EVM0018082	0.0556217	EVM0011294	EVM0013586	0.0343281	EVM0014685	EVM0021688	0.0373856
			EVM0003060	EVM0006222	0.062081	EVM0001790	EVM0016720	0.0248034	EVM0000658	EVM0017725	0.0409883				EVM0004711	EVM0013841	0.0470344	EVM0009170	EVM0009839	0.0548048	EVM0011294	EVM0011451	0.0339093	EVM0014685	EVM0023034	0.0366382
			EVM0003060	EVM0004566	0.0619455	EVM0002691	EVM0016720	0.0246711	EVM0001829	EVM0017725	0.0409861				EVM0004711	EVM0013843	0.0306319	EVM0009170	EVM0016569	0.0547956	EVM0011294	EVM0014017	0.0337934	EVM0014685	EVM0018962	0.0365709
			EVM0003060	EVM0022813	0.0618256	EVM0003573	EVM0016720	0.0246709	EVM0004267	EVM0017725	0.0409125				EVM0004711	EVM0013933	0.0290213	EVM0009170	EVM0014828	0.0546021	EVM0011294	EVM0019484	0.0335645	EVM0014685	EVM0022252	0.0364427
			EVM0003060	EVM0024016	0.0616796	EVM0004728	EVM0016720	0.0237074	EVM0002165	EVM0017725	0.0404725				EVM0004711	EVM0014000	0.032307	EVM0009170	EVM0016930	0.054485	EVM0011294	EVM0011487	0.0334858	EVM0014685	EVM0016168	0.0363056
			EVM0003060	EVM0011102	0.0616765	EVM0004207	EVM0016720	0.0236915	EVM0001468	EVM0017725	0.0404179				EVM0004711	EVM0014134	0.0400685	EVM0009170	EVM0012622	0.0535772	EVM0011294	EVM0021705	0.0331988	EVM0014685	EVM0022062	0.0345776
			EVM0003060	EVM0018540	0.0615697	EVM0004208	EVM0016720	0.0236866	EVM0005015	EVM0017725	0.0403832				EVM0004711	EVM0014224	0.0387464	EVM0009170	EVM0019197	0.0532335	EVM0011294	EVM0021846	0.0331269	EVM0014685	EVM0014874	0.0337362
			EVM0003060	EVM0019660	0.0614096	EVM0001757	EVM0016720	0.0235717	EVM0004208	EVM0017725	0.0403766				EVM0004711	EVM0014584	0.0289137	EVM0009170	EVM0010802	0.0529034	EVM0011294	EVM0012622	0.033007	EVM0014685	EVM0016017	0.0337278
			EVM0003060	EVM0003370	0.0613123	EVM0000995	EVM0016720	0.0234464	EVM0001034	EVM0017725	0.0400924				EVM0004711	EVM0014634	0.0201339	EVM0009170	EVM0022735	0.0528269	EVM0011294	EVM0011532	0.0322343	EVM0014685	EVM0018748	0.0337066
			EVM0003060	EVM0004903	0.0609235	EVM0005015	EVM0016720	0.0230559	EVM0002774	EVM0017725	0.0386577				EVM0004711	EVM0014751	0.0326674	EVM0009170	EVM0012559	0.0522605	EVM0011294	EVM0021734	0.0321737	EVM0014685	EVM0023439	0.0336818
			EVM0003060	EVM0024051	0.0608563	EVM0000776	EVM0016720	0.023014	EVM0003526	EVM0017725	0.0385503				EVM0004711	EVM0014792	0.030553	EVM0009170	EVM0020430	0.0508801	EVM0011294	EVM0023834	0.0318675	EVM0014685	EVM0021640	0.0328065
			EVM0003060	EVM0021244	0.0607452	EVM0000849	EVM0016720	0.0228997	EVM0000849	EVM0017725	0.0385009				EVM0004711	EVM0014826	0.0247697	EVM0009170	EVM0018301	0.0506286	EVM0011294	EVM0014220	0.0318621	EVM0014685	EVM0022893	0.0327066
			EVM0003060	EVM0009246	0.0606535	EVM0002969	EVM0016720	0.022879	EVM0003125	EVM0017725	0.0376733				EVM0004711	EVM0014835	0.0275582	EVM0009170	EVM0016316	0.0506064	EVM0011294	EVM0022229	0.0318475	EVM0014685	EVM0019238	0.0324643
			EVM0003060	EVM0005384	0.0605718	EVM0004045	EVM0016720	0.022729	EVM0002958	EVM0017725	0.0373375				EVM0004711	EVM0014887	0.0365934	EVM0009170	EVM0021792	0.0504862	EVM0011294	EVM0023454	0.031661	EVM0014685	EVM0022803	0.0323838
			EVM0003060	EVM0017969	0.0604405	EVM0002137	EVM0016720	0.022703	EVM0001352	EVM0017725	0.0371938				EVM0004711	EVM0014952	0.0482495	EVM0009170	EVM0021683	0.0497258	EVM0011294	EVM0016392	0.0314165	EVM0014685	EVM0018436	0.0316602
			EVM0003060	EVM0019721	0.0603137	EVM0002231	EVM0016720	0.0224865	EVM0003651	EVM0017725	0.0361752				EVM0004711	EVM0015048	0.0301576	EVM0009170	EVM0014246	0.0494056	EVM0011294	EVM0024090	0.030964	EVM0014685	EVM0020169	0.0316099
			EVM0003060	EVM0007760	0.0601631	EVM0003203	EVM0016720	0.0223983	EVM0004276	EVM0017725	0.0359549				EVM0004711	EVM0015053	0.023732	EVM0009170	EVM0009320	0.0487531	EVM0011294	EVM0016021	0.0306743	EVM0014685	EVM0020129	0.0313468
			EVM0003060	EVM0018619	0.0600192	EVM0004059	EVM0016720	0.0221817	EVM0004741	EVM0017725	0.0356496				EVM0004711	EVM0015133	0.0234266	EVM0009170	EVM0009315	0.0483141	EVM0011294	EVM0022234	0.0306363	EVM0014685	EVM0023887	0.0312831
			EVM0003060	EVM0008832	0.0597568	EVM0002571	EVM0016720	0.0221714	EVM0004658	EVM0017725	0.0350903				EVM0004711	EVM0015240	0.0307129	EVM0009170	EVM0015341	0.0479513	EVM0011294	EVM0022131	0.0303046	EVM0014685	EVM0017672	0.0312728
			EVM0003060	EVM0010379	0.0595757	EVM0001446	EVM0016720	0.0220709	EVM0000184	EVM0017725	0.0348602				EVM0004711	EVM0015311	0.030422	EVM0009170	EVM0010483	0.0478096	EVM0011294	EVM0012090	0.0302562	EVM0014685	EVM0018839	0.031254
			EVM0003060	EVM0005392	0.0594953	EVM0004432	EVM0016720	0.0220111	EVM0001004	EVM0017725	0.0346275				EVM0004711	EVM0015498	0.0344437	EVM0009170	EVM0021846	0.0477728	EVM0011294	EVM0011410	0.0297338	EVM0014685	EVM0018512	0.0312292
			EVM0003060	EVM0009104	0.0594257	EVM0003279	EVM0016720	0.0219078	EVM0002271	EVM0017725	0.034576				EVM0004711	EVM0015603	0.0278191	EVM0009170	EVM0014425	0.0476445	EVM0011294	EVM0016659	0.0297028	EVM0014685	EVM0016416	0.0311747
			EVM0003060	EVM0009438	0.0591864	EVM0004981	EVM0016720	0.0217048	EVM0004001	EVM0017725	0.0344945				EVM0004711	EVM0015736	0.0266263	EVM0009170	EVM0011487	0.0469903	EVM0011294	EVM0014425	0.029403	EVM0014685	EVM0015614	0.0305177
			EVM0003060	EVM0021634	0.0591037	EVM0004713	EVM0016720	0.0216407	EVM0001117	EVM0017725	0.034048				EVM0004711	EVM0015755	0.025629	EVM0009170	EVM0012274	0.0466203	EVM0011294	EVM0013801	0.0292732	EVM0014685	EVM0023178	0.0304013
			EVM0003060	EVM0018244	0.0590598	EVM0002263	EVM0016720	0.0210177	EVM0000857	EVM0017725	0.033739				EVM0004711	EVM0016183	0.0288084	EVM0009170	EVM0020639	0.0464973	EVM0011294	EVM0018194	0.0292661	EVM0014685	EVM0016739	0.0302274
			EVM0003060	EVM0016998	0.0590093	EVM0003526	EVM0016720	0.0208818	EVM0002487	EVM0017725	0.0337151				EVM0004711	EVM0016232	0.0370203	EVM0009170	EVM0013586	0.0457445	EVM0011294	EVM0011548	0.0289777	EVM0014685	EVM0016163	0.0301785
			EVM0003060	EVM0003498	0.0589256	EVM0000254	EVM0016720	0.0207089	EVM0003826	EVM0017725	0.0337097				EVM0004711	EVM0016336	0.0345764	EVM0009170	EVM0016322	0.0457268	EVM0011294	EVM0018082	0.0289099	EVM0014685	EVM0022762	0.0299092
			EVM0003060	EVM0014356	0.0588698	EVM0000104	EVM0016720	0.0206889	EVM0003356	EVM0017725	0.0334142				EVM0004711	EVM0016663	0.0317832	EVM0009170	EVM0018758	0.0453186	EVM0011294	EVM0019197	0.028858	EVM0014685	EVM0015752	0.0298393
			EVM0003060	EVM0006263	0.0588155	EVM0004094	EVM0016720	0.0206274	EVM0004428	EVM0017725	0.0332977				EVM0004711	EVM0016774	0.0218899	EVM0009170	EVM0016895	0.0449836	EVM0011294	EVM0021683	0.028547	EVM0014685	EVM0023902	0.0297743
			EVM0003060	EVM0019465	0.0586459	EVM0001690	EVM0016720	0.0205657	EVM0004102	EVM0017725	0.033291				EVM0004711	EVM0016846	0.0376176	EVM0009170	EVM0009285	0.0444884	EVM0011294	EVM0021792	0.0284639	EVM0014685	EVM0017411	0.0294346
			EVM0003060	EVM0009463	0.0586423	EVM0003356	EVM0016720	0.0204786	EVM0000776	EVM0017725	0.0332347				EVM0004711	EVM0017019	0.037255	EVM0009170	EVM0014505	0.0442864	EVM0011294	EVM0018974	0.0284467	EVM0014685	EVM0019396	0.0293821
			EVM0003060	EVM0014673	0.0586419	EVM0001785	EVM0016720	0.0203812	EVM0004994	EVM0017725	0.0331144				EVM0004711	EVM0017254	0.0457296	EVM0009170	EVM0016659	0.0438728	EVM0011294	EVM0012044	0.0283954	EVM0014685	EVM0023605	0.0282534
			EVM0003060	EVM0011774	0.0583357	EVM0001316	EVM0016720	0.0202549	EVM0003170	EVM0017725	0.0329277				EVM0004711	EVM0017339	0.0477166	EVM0009170	EVM0019484	0.043586	EVM0011294	EVM0015737	0.0276703	EVM0014685	EVM0020722	0.0274503
			EVM0003060	EVM0022218	0.0582664	EVM0001311	EVM0016720	0.0202321	EVM0004773	EVM0017725	0.032819				EVM0004711	EVM0017340	0.0262213	EVM0009170	EVM0019922	0.0430711	EVM0011294	EVM0023146	0.0276074	EVM0014685	EVM0016146	0.0272954
			EVM0003060	EVM0014213	0.0582539	EVM0000429	EVM0016720	0.0200082	EVM0002880	EVM0017725	0.0326415				EVM0004711	EVM0017514	0.0209283	EVM0009170	EVM0021582	0.0429229	EVM0011294	EVM0019672	0.0274071	EVM0014685	EVM0020181	0.0272383
			EVM0003060	EVM0011409	0.0581923	EVM0002381	EVM0016720	0.0196672	EVM0003227	EVM0017725	0.0324936				EVM0004711	EVM0017593	0.0299725	EVM0009170	EVM0011262	0.042576	EVM0011294	EVM0022566	0.0272779	EVM0014685	EVM0023263	0.0263034
			EVM0003060	EVM0018207	0.0581301	EVM0001720	EVM0016720	0.0195013	EVM0004234	EVM0017725	0.032437				EVM0004711	EVM0017666	0.0369684	EVM0009170	EVM0015737	0.0425473	EVM0011294	EVM0021971	0.0272414	EVM0014685	EVM0015455	0.0262201
			EVM0003060	EVM0019336	0.0580931	EVM0002742	EVM0016720	0.0193366	EVM0000278	EVM0017725	0.032144				EVM0004711	EVM0017775	0.0231051	EVM0009170	EVM0022131	0.0424141	EVM0011294	EVM0018804	0.0271952	EVM0014685	EVM0022551	0.0262155
			EVM0003060	EVM0007525	0.0580681	EVM0001520	EVM0016720	0.0193039	EVM0003320	EVM0017725	0.0320848				EVM0004711	EVM0018004	0.0242539	EVM0009170	EVM0010884	0.0418796	EVM0011294	EVM0015523	0.0268735	EVM0014685	EVM0018574	0.0260971
			EVM0003060	EVM0008632	0.0579164	EVM0001117	EVM0016720	0.0192707	EVM0001466	EVM0017725	0.0319775				EVM0004711	EVM0018123	0.0220749	EVM0009170	EVM0014220	0.0418263	EVM0011294	EVM0019922	0.0268543	EVM0014685	EVM0019062	0.025754
			EVM0003060	EVM0007993	0.0577827	EVM0000932	EVM0016720	0.0188586	EVM0004416	EVM0017725	0.0315018				EVM0004711	EVM0018212	0.021524	EVM0009170	EVM0021106	0.0416847	EVM0011294	EVM0021582	0.0266317	EVM0014685	EVM0023364	0.0256417
			EVM0003060	EVM0022658	0.0576338	EVM0004160	EVM0016720	0.0188294	EVM0002105	EVM0017725	0.0314293				EVM0004711	EVM0018326	0.0367887	EVM0009170	EVM0017779	0.0413375	EVM0011294	EVM0016322	0.0265654	EVM0014685	EVM0023678	0.0253822
			EVM0003060	EVM0008070	0.0575622	EVM0002958	EVM0016720	0.0188209	EVM0003907	EVM0017725	0.0314194				EVM0004711	EVM0018365	0.0482801	EVM0009170	EVM0011451	0.0412551	EVM0011294	EVM0017421	0.0265184	EVM0014685	EVM0024119	0.0251734
			EVM0003060	EVM0014946	0.0575257	EVM0002994	EVM0016720	0.0187981	EVM0004832	EVM0017725	0.0312884				EVM0004711	EVM0018400	0.0498933	EVM0009170	EVM0014173	0.0410032	EVM0011294	EVM0014173	0.0264406	EVM0014685	EVM0015724	0.0250832
			EVM0003060	EVM0007637	0.0574462	EVM0002271	EVM0016720	0.0182452	EVM0005115	EVM0017725	0.0303944				EVM0004711	EVM0018568	0.0264657	EVM0009170	EVM0018974	0.0408121	EVM0011294	EVM0017654	0.0262582	EVM0014685	EVM0018867	0.0245005
			EVM0003060	EVM0016123	0.0574167	EVM0000598	EVM0016720	0.0179573	EVM0002571	EVM0017725	0.0303848				EVM0004711	EVM0018828	0.0497383	EVM0009170	EVM0013569	0.0407825	EVM0011294	EVM0016132	0.0262465	EVM0014685	EVM0015400	0.0240134
			EVM0003060	EVM0023353	0.0573951	EVM0004054	EVM0016720	0.0179523	EVM0005072	EVM0017725	0.0301677				EVM0004711	EVM0018859	0.062838	EVM0009170	EVM0010484	0.0405169	EVM0011294	EVM0023217	0.0259842	EVM0014685	EVM0022348	0.023221
			EVM0003060	EVM0014296	0.0573127	EVM0001517	EVM0016720	0.0178164	EVM0004653	EVM0017725	0.0298774				EVM0004711	EVM0018860	0.0279029	EVM0009170	EVM0021705	0.0403944	EVM0011294	EVM0014799	0.0256682	EVM0014685	EVM0023826	0.0227158
			EVM0003060	EVM0007988	0.0571205	EVM0003184	EVM0016720	0.0176642	EVM0001441	EVM0017725	0.0298152				EVM0004711	EVM0018932	0.0486012	EVM0009170	EVM0019449	0.0403005	EVM0011294	EVM0018758	0.025517	EVM0014685	EVM0017167	0.0225892
			EVM0003060	EVM0012596	0.0570964	EVM0000914	EVM0016720	0.0175079	EVM0003336	EVM0017725	0.0295643				EVM0004711	EVM0019139	0.0503791	EVM0009170	EVM0018804	0.0401605	EVM0011294	EVM0022790	0.0254859	EVM0014685	EVM0019931	0.0225624
			EVM0003060	EVM0012849	0.0568685	EVM0003640	EVM0016720	0.0173851	EVM0001179	EVM0017725	0.028849				EVM0004711	EVM0019277	0.0375945	EVM0009170	EVM0017815	0.040147	EVM0011294	EVM0014927	0.0252581	EVM0014685	EVM0019614	0.0216476
			EVM0003060	EVM0020931	0.0568586	EVM0005022	EVM0016720	0.0168093	EVM0003573	EVM0017725	0.0285534				EVM0004711	EVM0019300	0.0215957	EVM0009170	EVM0021971	0.0399194	EVM0011294	EVM0015341	0.0245859	EVM0014685	EVM0015448	0.0215887
			EVM0003060	EVM0007692	0.0568523	EVM0000795	EVM0016720	0.0167829	EVM0004935	EVM0017725	0.0284966				EVM0004711	EVM0019502	0.0290203	EVM0009170	EVM0009531	0.0397049	EVM0011294	EVM0016858	0.0245762	EVM0014685	EVM0019268	0.0213269
			EVM0003060	EVM0021032	0.0568193	EVM0000440	EVM0016720	0.0166584	EVM0000263	EVM0017725	0.0283557				EVM0004711	EVM0019664	0.0497345	EVM0009170	EVM0010587	0.0396163	EVM0011294	EVM0012154	0.0245244	EVM0014685	EVM0016487	0.0207904
			EVM0003060	EVM0018829	0.0567796	EVM0004416	EVM0016720	0.0166521	EVM0001698	EVM0017725	0.0283544				EVM0004711	EVM0019681	0.0373246	EVM0009170	EVM0023254	0.0393142	EVM0011294	EVM0023254	0.0244296	EVM0014685	EVM0019812	0.0207903
			EVM0003060	EVM0013313	0.0566771	EVM0003861	EVM0016720	0.0165319	EVM0001316	EVM0017725	0.0281434				EVM0004711	EVM0019714	0.0223605	EVM0009170	EVM0010872	0.0389998	EVM0011294	EVM0018472	0.0243625	EVM0014685	EVM0023301	0.0205658
			EVM0003060	EVM0019907	0.0566738	EVM0003235	EVM0016720	0.0164811	EVM0001129	EVM0017725	0.0281171				EVM0004711	EVM0020026	0.022446	EVM0009170	EVM0009700	0.0388192	EVM0011294	EVM0014615	0.0243096	EVM0014685	EVM0016960	0.0205547
			EVM0003060	EVM0019280	0.0565172	EVM0002682	EVM0016720	0.0163664	EVM0000254	EVM0017725	0.0280425				EVM0004711	EVM0020105	0.0290395	EVM0009170	EVM0020303	0.0383218	EVM0011294	EVM0021901	0.024299	EVM0014685	EVM0021342	0.0201584
			EVM0003060	EVM0004782	0.0563383	EVM0003887	EVM0016720	0.0163538	EVM0004919	EVM0017725	0.027936				EVM0004711	EVM0020167	0.0541512	EVM0009170	EVM0010021	0.038062	EVM0011294	EVM0018191	0.0239332	EVM0014685	EVM0016261	0.0200586
			EVM0003060	EVM0023736	0.0562543	EVM0001646	EVM0016720	0.0163157	EVM0003777	EVM0017725	0.0273219				EVM0004711	EVM0020225	0.0313738	EVM0009170	EVM0023349	0.0374234	EVM0011294	EVM0014769	0.0238499	EVM0014685	EVM0018483	0.0198322
			EVM0003060	EVM0007518	0.0561988	EVM0001733	EVM0016720	0.0162714	EVM0001790	EVM0017725	0.0272387				EVM0004711	EVM0020546	0.0310962	EVM0009170	EVM0009430	0.0373627	EVM0011294	EVM0021062	0.0235505	EVM0014685	EVM0016547	0.0194249
			EVM0003060	EVM0018247	0.0561339	EVM0003262	EVM0016720	0.0160763	EVM0000801	EVM0017725	0.0271326				EVM0004711	EVM0020616	0.03224	EVM0009170	EVM0022234	0.0372943	EVM0011294	EVM0020872	0.0234342	EVM0014685	EVM0018771	0.0189569
			EVM0003060	EVM0017289	0.0561241	EVM0004653	EVM0016720	0.0159827	EVM0004045	EVM0017725	0.0270827				EVM0004711	EVM0020897	0.0205908	EVM0009170	EVM0023217	0.0369688	EVM0011294	EVM0016895	0.0231796	EVM0014685	EVM0017776	0.0189472
			EVM0003060	EVM0013650	0.0559511	EVM0004267	EVM0016720	0.0157759	EVM0003984	EVM0017725	0.0269385				EVM0004711	EVM0021020	0.0379209	EVM0009170	EVM0017243	0.0368643	EVM0011294	EVM0018095	0.0231767	EVM0014685	EVM0019422	0.0187297
			EVM0003060	EVM0010078	0.0556188	EVM0002690	EVM0016720	0.0157557	EVM0004713	EVM0017725	0.0268938				EVM0004711	EVM0021072	0.0209235	EVM0009170	EVM0009357	0.0368539	EVM0011294	EVM0019978	0.0230533	EVM0014685	EVM0017244	0.0186672
			EVM0003060	EVM0015299	0.0555647	EVM0003516	EVM0016720	0.0156144	EVM0002562	EVM0017725	0.0267246				EVM0004711	EVM0021176	0.0404	EVM0009170	EVM0023961	0.036555	EVM0011294	EVM0023600	0.0230285	EVM0014685	EVM0023919	0.0185788
			EVM0003060	EVM0019610	0.0555542	EVM0002828	EVM0016720	0.0156033	EVM0002649	EVM0017725	0.0265653				EVM0004711	EVM0021194	0.0260134	EVM0009170	EVM0023454	0.0365531	EVM0011294	EVM0012180	0.0229511	EVM0014685	EVM0018169	0.018373
			EVM0003060	EVM0021391	0.0553807	EVM0004023	EVM0016720	0.015434	EVM0003073	EVM0017725	0.0265362				EVM0004711	EVM0021231	0.0315645	EVM0009170	EVM0020386	0.0360555	EVM0011294	EVM0016569	0.0228281	EVM0014685	EVM0016377	0.0183679
			EVM0003060	EVM0022635	0.0551314	EVM0004281	EVM0016720	0.0153631	EVM0001462	EVM0017725	0.0263767				EVM0004711	EVM0021284	0.027295	EVM0009170	EVM0011740	0.0359688	EVM0011294	EVM0023076	0.0222839	EVM0014685	EVM0020930	0.0180129
			EVM0003060	EVM0023652	0.0550571	EVM0003125	EVM0016720	0.015362	EVM0004233	EVM0017725	0.0263601				EVM0004711	EVM0021368	0.041501	EVM0009170	EVM0014321	0.0359281	EVM0011294	EVM0017243	0.0220922	EVM0014685	EVM0015996	0.0179697
			EVM0003060	EVM0022423	0.0550422	EVM0002181	EVM0016720	0.0153462	EVM0000598	EVM0017725	0.0259438				EVM0004711	EVM0021373	0.042857	EVM0009170	EVM0010650	0.035674	EVM0011294	EVM0014903	0.0217946	EVM0014685	EVM0021425	0.0179656
			EVM0003060	EVM0004713	0.0549317	EVM0001129	EVM0016720	0.0152593	EVM0004850	EVM0017725	0.0258689				EVM0004711	EVM0021390	0.0336041	EVM0009170	EVM0015523	0.035335	EVM0011294	EVM0012347	0.0215252	EVM0014685	EVM0014712	0.0179505
			EVM0003060	EVM0020098	0.0549114	EVM0004360	EVM0016720	0.0151628	EVM0001195	EVM0017725	0.0257099				EVM0004711	EVM0021558	0.0431791	EVM0009170	EVM0012492	0.0350197	EVM0011294	EVM0021106	0.0213733	EVM0014685	EVM0016264	0.0178078
			EVM0003060	EVM0014968	0.0548002	EVM0004917	EVM0016720	0.0151272	EVM0001279	EVM0017725	0.0254907				EVM0004711	EVM0021572	0.0270357	EVM0009170	EVM0019507	0.03492	EVM0011294	EVM0021687	0.0210062	EVM0014685	EVM0019081	0.0176469
			EVM0003060	EVM0014135	0.0547287	EVM0001091	EVM0016720	0.0151133	EVM0002913	EVM0017725	0.0252665				EVM0004711	EVM0021833	0.0218831	EVM0009170	EVM0014389	0.034784	EVM0011294	EVM0013948	0.0208857	EVM0014685	EVM0022355	0.017594
			EVM0003060	EVM0003630	0.0546977	EVM0000161	EVM0016720	0.0150329	EVM0003887	EVM0017725	0.0252289				EVM0004711	EVM0022051	0.0335215	EVM0009170	EVM0016132	0.0345666	EVM0011294	EVM0011839	0.0206264	EVM0014685	EVM0014818	0.0173411
			EVM0003060	EVM0006502	0.0545694	EVM0002563	EVM0016720	0.0148965	EVM0002181	EVM0017725	0.0248932				EVM0004711	EVM0022057	0.0229841	EVM0009170	EVM0023927	0.0345478	EVM0011294	EVM0020092	0.0205974	EVM0014685	EVM0020043	0.0172397
			EVM0003060	EVM0010126	0.0544854	EVM0003189	EVM0016720	0.0147579	EVM0004592	EVM0017725	0.0247041				EVM0004711	EVM0022142	0.0245527	EVM0009170	EVM0012401	0.0343699	EVM0011294	EVM0014993	0.0204469	EVM0014685	EVM0019901	0.0171343
			EVM0003060	EVM0013890	0.0544655	EVM0001866	EVM0016720	0.0144576	EVM0005095	EVM0017725	0.0245762				EVM0004711	EVM0022262	0.023682	EVM0009170	EVM0012347	0.0341582	EVM0011294	EVM0017779	0.0202622	EVM0014685	EVM0022064	0.0170328
			EVM0003060	EVM0015338	0.0541463	EVM0003345	EVM0016720	0.0143233	EVM0001945	EVM0017725	0.0245686				EVM0004711	EVM0022304	0.0256181	EVM0009170	EVM0021189	0.0340772	EVM0011294	EVM0016301	0.0202348	EVM0014685	EVM0018174	0.0169725
			EVM0003060	EVM0005261	0.0541244	EVM0003826	EVM0016720	0.0143079	EVM0001017	EVM0017725	0.0242854				EVM0004711	EVM0022351	0.0344209	EVM0009170	EVM0013801	0.0340532	EVM0011294	EVM0012488	0.020053	EVM0014685	EVM0022594	0.016775
			EVM0003060	EVM0010015	0.0538536	EVM0001389	EVM0016720	0.0141937	EVM0000440	EVM0017725	0.0241564				EVM0004711	EVM0022408	0.0226916	EVM0009170	EVM0011532	0.0340067				EVM0014685	EVM0022646	0.0164018
			EVM0003060	EVM0017549	0.0536516	EVM0000968	EVM0016720	0.0141683	EVM0003490	EVM0017725	0.0239895				EVM0004711	EVM0022546	0.0243472	EVM0009170	EVM0011839	0.0339054				EVM0014685	EVM0015169	0.0162725
			EVM0003060	EVM0021528	0.0536489	EVM0003169	EVM0016720	0.0141019	EVM0003189	EVM0017725	0.0236818				EVM0004711	EVM0022688	0.0343954	EVM0009170	EVM0023076	0.0336706				EVM0014685	EVM0020174	0.0160492
			EVM0003060	EVM0023843	0.0535814	EVM0002057	EVM0016720	0.0140729	EVM0001272	EVM0017725	0.023518				EVM0004711	EVM0022720	0.0265975	EVM0009170	EVM0022573	0.0331574				EVM0014685	EVM0018759	0.0159459
			EVM0003060	EVM0018143	0.0535299	EVM0002076	EVM0016720	0.01398	EVM0001934	EVM0017725	0.0233531				EVM0004711	EVM0022932	0.0482626	EVM0009170	EVM0016658	0.0330859				EVM0014685	EVM0015913	0.0159246
			EVM0003060	EVM0003146	0.0530985	EVM0000199	EVM0016720	0.0139653	EVM0001866	EVM0017725	0.023282				EVM0004711	EVM0023000	0.0204196	EVM0009170	EVM0021062	0.0330796				EVM0014685	EVM0022031	0.0157426
			EVM0003060	EVM0021159	0.0530845	EVM0000636	EVM0016720	0.013818	EVM0002430	EVM0017725	0.0232638				EVM0004711	EVM0023248	0.0261557	EVM0009170	EVM0022229	0.0330625				EVM0014685	EVM0017314	0.0147747
			EVM0003060	EVM0007502	0.0529018	EVM0001034	EVM0016720	0.0137509	EVM0000906	EVM0017725	0.0231212				EVM0004711	EVM0023256	0.0245787	EVM0009170	EVM0012488	0.0328766				EVM0014685	EVM0017900	0.0142881
			EVM0003060	EVM0013393	0.0527684	EVM0000061	EVM0016720	0.0136874	EVM0000435	EVM0017725	0.0231				EVM0004711	EVM0023316	0.0433965	EVM0009170	EVM0020872	0.0327166				EVM0014685	EVM0015876	0.0139096
			EVM0003060	EVM0018756	0.0523589	EVM0002638	EVM0016720	0.0136614	EVM0002611	EVM0017725	0.0227332				EVM0004711	EVM0023371	0.0225719	EVM0009170	EVM0018995	0.0325564				EVM0014685	EVM0019564	0.0138661
			EVM0003060	EVM0016686	0.0522931	EVM0001195	EVM0016720	0.0136319	EVM0001543	EVM0017725	0.0224787				EVM0004711	EVM0023636	0.0354647	EVM0009170	EVM0012180	0.0324863				EVM0014685	EVM0016113	0.013175
			EVM0003060	EVM0022959	0.0522182	EVM0001664	EVM0016720	0.0133864	EVM0001068	EVM0017725	0.0223988				EVM0004711	EVM0023706	0.0281475	EVM0009170	EVM0016249	0.0324295				EVM0014685	EVM0018693	0.0125476
			EVM0003060	EVM0013778	0.0521976	EVM0002595	EVM0016720	0.0132667	EVM0002231	EVM0017725	0.0223951				EVM0004711	EVM0023787	0.0279364	EVM0009170	EVM0019978	0.0321222				EVM0014685	EVM0016090	0.0123298
			EVM0003060	EVM0010903	0.0521532	EVM0001970	EVM0016720	0.0132637	EVM0000459	EVM0017725	0.0223459				EVM0004711	EVM0023934	0.020789	EVM0009170	EVM0022790	0.0319711				EVM0014685	EVM0019489	0.0122589
			EVM0003060	EVM0006167	0.052104	EVM0003010	EVM0016720	0.0132312	EVM0001517	EVM0017725	0.0223439				EVM0004711	EVM0023947	0.0448087	EVM0009170	EVM0009910	0.0317596				EVM0014685	EVM0016302	0.0121662
			EVM0003060	EVM0011640	0.0520784	EVM0003750	EVM0016720	0.0132132	EVM0002897	EVM0017725	0.0223236				EVM0004711	EVM0024077	0.0217488	EVM0009170	EVM0016858	0.0317046				EVM0014685	EVM0017290	0.0120794
			EVM0003060	EVM0022651	0.0517884	EVM0004423	EVM0016720	0.0131845	EVM0004207	EVM0017725	0.022292							EVM0009170	EVM0018986	0.0317046				EVM0014685	EVM0017336	0.0114248
			EVM0003060	EVM0022929	0.0517368	EVM0000086	EVM0016720	0.0131311	EVM0003165	EVM0017725	0.0222556							EVM0009170	EVM0024029	0.031589				EVM0014685	EVM0015607	0.0110977
			EVM0003060	EVM0007795	0.0515311	EVM0000278	EVM0016720	0.0129774	EVM0000795	EVM0017725	0.0222547							EVM0009170	EVM0018095	0.031303				EVM0014685	EVM0021184	0.0110369
			EVM0003060	EVM0021935	0.0514224	EVM0000906	EVM0016720	0.0129096	EVM0000636	EVM0017725	0.0222528							EVM0009170	EVM0021734	0.0311886				EVM0014685	EVM0022815	0.0109599
			EVM0003060	EVM0023852	0.0513204	EVM0003603	EVM0016720	0.0128827	EVM0003228	EVM0017725	0.0222005							EVM0009170	EVM0018425	0.0310474				EVM0014685	EVM0016266	0.010955
			EVM0003060	EVM0006538	0.0513083	EVM0001441	EVM0016720	0.0128709	EVM0003235	EVM0017725	0.0221862							EVM0009170	EVM0009509	0.0305432				EVM0014685	EVM0015064	0.0108952
			EVM0003060	EVM0011915	0.0512689	EVM0001698	EVM0016720	0.0128424	EVM0000356	EVM0017725	0.0221446							EVM0009170	EVM0017456	0.0303058				EVM0014685	EVM0014822	0.0108355
			EVM0003060	EVM0012706	0.0509804	EVM0002649	EVM0016720	0.0128303	EVM0003603	EVM0017725	0.0221403							EVM0009170	EVM0009812	0.0299586				EVM0014685	EVM0021172	0.0108081
			EVM0003060	EVM0021181	0.0509038	EVM0003747	EVM0016720	0.0127887	EVM0001520	EVM0017725	0.0221346							EVM0009170	EVM0019672	0.029921				EVM0014685	EVM0016939	0.0106272
			EVM0003060	EVM0011436	0.0505665	EVM0002930	EVM0016720	0.0126562	EVM0002563	EVM0017725	0.022049							EVM0009170	EVM0021901	0.0295801				EVM0014685	EVM0016222	0.010576
			EVM0003060	EVM0017576	0.0504606	EVM0003246	EVM0016720	0.0126134	EVM0001050	EVM0017725	0.021906							EVM0009170	EVM0018947	0.0290489				EVM0014685	EVM0020505	0.0104306
			EVM0003060	EVM0004234	0.0501565	EVM0003588	EVM0016720	0.0124406	EVM0000061	EVM0017725	0.0217992							EVM0009170	EVM0021511	0.0289142				EVM0014685	EVM0022944	0.0101911
			EVM0003060	EVM0009675	0.0500773	EVM0004424	EVM0016720	0.0124054	EVM0002682	EVM0017725	0.0215469							EVM0009170	EVM0011260	0.0286445				EVM0014685	EVM0017909	0.0100521
			EVM0003060	EVM0012980	0.0499783	EVM0002541	EVM0016720	0.0123694	EVM0000968	EVM0017725	0.0215031							EVM0009170	EVM0012709	0.0286264
			EVM0003060	EVM0015416	0.0499782	EVM0002528	EVM0016720	0.0123435	EVM0003203	EVM0017725	0.0214553							EVM0009170	EVM0013457	0.028553
			EVM0003060	EVM0023921	0.0499722	EVM0002221	EVM0016720	0.0121792	EVM0001890	EVM0017725	0.0209974							EVM0009170	EVM0011548	0.0283239
			EVM0003060	EVM0014447	0.049926	EVM0003875	EVM0016720	0.0121372	EVM0003760	EVM0017725	0.0209713							EVM0009170	EVM0021073	0.0282342
			EVM0003060	EVM0013325	0.0499032	EVM0002027	EVM0016720	0.0121124	EVM0002828	EVM0017725	0.0209706							EVM0009170	EVM0021998	0.028092
			EVM0003060	EVM0015452	0.049819	EVM0000413	EVM0016720	0.0121013	EVM0004142	EVM0017725	0.020763							EVM0009170	EVM0013948	0.0276956
			EVM0003060	EVM0018424	0.0498043	EVM0004603	EVM0016720	0.0120725	EVM0003279	EVM0017725	0.0206749							EVM0009170	EVM0014101	0.0274768
			EVM0003060	EVM0006228	0.0497946	EVM0004428	EVM0016720	0.0120448	EVM0004968	EVM0017725	0.0206674							EVM0009170	EVM0019408	0.0274356
			EVM0003060	EVM0006699	0.0496727	EVM0004935	EVM0016720	0.0117532	EVM0002980	EVM0017725	0.0206587							EVM0009170	EVM0018191	0.0272144
			EVM0003060	EVM0021473	0.0496444	EVM0001352	EVM0016720	0.0116167	EVM0003246	EVM0017725	0.0205665							EVM0009170	EVM0022725	0.0271351
			EVM0003060	EVM0007514	0.0495117	EVM0002876	EVM0016720	0.0116158	EVM0003080	EVM0017725	0.0205487							EVM0009170	EVM0023271	0.0270129
			EVM0003060	EVM0009597	0.0493341	EVM0003050	EVM0016720	0.0115614	EVM0003060	EVM0017725	0.0205313							EVM0009170	EVM0017654	0.026993
			EVM0003060	EVM0017261	0.0493073	EVM0001004	EVM0016720	0.0115411	EVM0000130	EVM0017725	0.0205083							EVM0009170	EVM0018416	0.0268245
			EVM0003060	EVM0014378	0.0491753	EVM0004832	EVM0016720	0.011356	EVM0005125	EVM0017725	0.0204591							EVM0009170	EVM0023600	0.0260161
			EVM0003060	EVM0011382	0.0491065	EVM0002358	EVM0016720	0.0111579	EVM0003184	EVM0017725	0.0201227							EVM0009170	EVM0020092	0.0259432
			EVM0003060	EVM0008359	0.0489751	EVM0001944	EVM0016720	0.0111113	EVM0001720	EVM0017725	0.0200558							EVM0009170	EVM0013922	0.0257568
			EVM0003060	EVM0019313	0.0487892	EVM0000184	EVM0016720	0.0110648	EVM0003144	EVM0017725	0.0199481							EVM0009170	EVM0017076	0.0255201
			EVM0003060	EVM0007303	0.0487797	EVM0004785	EVM0016720	0.0110293	EVM0004023	EVM0017725	0.0198853							EVM0009170	EVM0016759	0.0254345
			EVM0003060	EVM0010765	0.0487666	EVM0004721	EVM0016720	0.0110207	EVM0004983	EVM0017725	0.0198195							EVM0009170	EVM0014615	0.0252377
			EVM0003060	EVM0020389	0.0487617	EVM0001179	EVM0016720	0.0109746	EVM0002876	EVM0017725	0.019771							EVM0009170	EVM0016640	0.0252255
			EVM0003060	EVM0015871	0.0484067	EVM0001999	EVM0016720	0.0108325	EVM0003396	EVM0017725	0.0196784							EVM0009170	EVM0020406	0.0252101
			EVM0003060	EVM0018369	0.0483665	EVM0003829	EVM0016720	0.0106716	EVM0000351	EVM0017725	0.0195445							EVM0009170	EVM0021687	0.0251442
			EVM0003060	EVM0015217	0.0482317	EVM0000323	EVM0016720	0.0106218	EVM0004785	EVM0017725	0.0194788							EVM0009170	EVM0016515	0.0248345
			EVM0003060	EVM0021647	0.048042	EVM0002373	EVM0016720	0.0105492	EVM0002185	EVM0017725	0.01945							EVM0009170	EVM0012090	0.0247337
			EVM0003060	EVM0010231	0.0478081	EVM0002611	EVM0016720	0.0105426	EVM0000772	EVM0017725	0.0194145							EVM0009170	EVM0017180	0.024461
			EVM0003060	EVM0004009	0.0475814	EVM0001462	EVM0016720	0.0105108	EVM0002137	EVM0017725	0.0194136							EVM0009170	EVM0010982	0.0243891
			EVM0003060	EVM0014478	0.0475267	EVM0000130	EVM0016720	0.0104181	EVM0002641	EVM0017725	0.019054							EVM0009170	EVM0014903	0.0243888
			EVM0003060	EVM0019958	0.0473581	EVM0004305	EVM0016720	0.0103534	EVM0001505	EVM0017725	0.018932							EVM0009170	EVM0011294	0.0239527
			EVM0003060	EVM0021632	0.0472773	EVM0000351	EVM0016720	0.0103121	EVM0003081	EVM0017725	0.0187992							EVM0009170	EVM0017719	0.0239086
			EVM0003060	EVM0004919	0.0472294	EVM0002430	EVM0016720	0.01005	EVM0001163	EVM0017725	0.0187979							EVM0009170	EVM0010682	0.0239002
			EVM0003060	EVM0007883	0.04721				EVM0002108	EVM0017725	0.0186477							EVM0009170	EVM0021399	0.0237714
			EVM0003060	EVM0003614	0.0471657				EVM0002904	EVM0017725	0.0186172							EVM0009170	EVM0020925	0.0236638
			EVM0003060	EVM0015807	0.0469599				EVM0002970	EVM0017725	0.0182075							EVM0009170	EVM0011760	0.0232311
			EVM0003060	EVM0010676	0.0469449				EVM0003324	EVM0017725	0.0178733							EVM0009170	EVM0022346	0.0228
			EVM0003060	EVM0020983	0.046894				EVM0000096	EVM0017725	0.0177033							EVM0009170	EVM0014262	0.0225112
			EVM0003060	EVM0005460	0.0468249				EVM0004221	EVM0017725	0.017693							EVM0009170	EVM0017486	0.0223616
			EVM0003060	EVM0006830	0.0467991				EVM0004059	EVM0017725	0.0176141							EVM0009170	EVM0016406	0.0223158
			EVM0003060	EVM0020287	0.046792				EVM0002476	EVM0017725	0.0175759							EVM0009170	EVM0019933	0.0220989
			EVM0003060	EVM0003320	0.046651				EVM0001646	EVM0017725	0.0174657							EVM0009170	EVM0015419	0.0219621
			EVM0003060	EVM0008599	0.0466396				EVM0004728	EVM0017725	0.0173796							EVM0009170	EVM0012741	0.0218171
			EVM0003060	EVM0008880	0.0465806				EVM0000146	EVM0017725	0.0173443							EVM0009170	EVM0018102	0.0214577
			EVM0003060	EVM0009492	0.0465546				EVM0002690	EVM0017725	0.0172795							EVM0009170	EVM0021040	0.0213508
			EVM0003060	EVM0008242	0.0465361				EVM0001542	EVM0017725	0.0171576							EVM0009170	EVM0021082	0.021146
			EVM0003060	EVM0005276	0.0464018				EVM0002742	EVM0017725	0.0167589							EVM0009170	EVM0016021	0.0210776
			EVM0003060	EVM0014294	0.0463769				EVM0004195	EVM0017725	0.0166514							EVM0009170	EVM0014769	0.0210075
			EVM0003060	EVM0022323	0.0461379				EVM0004907	EVM0017725	0.0165317							EVM0009170	EVM0019406	0.0205929
			EVM0003060	EVM0019737	0.0458329				EVM0003084	EVM0017725	0.0164601							EVM0009170	EVM0009421	0.0205042
			EVM0003060	EVM0005781	0.04581				EVM0003661	EVM0017725	0.0164396							EVM0009170	EVM0024021	0.0203765
			EVM0003060	EVM0018241	0.0457623				EVM0004721	EVM0017725	0.0163394							EVM0009170	EVM0018220	0.0202717
			EVM0003060	EVM0012202	0.0457472				EVM0001970	EVM0017725	0.0163307							EVM0009170	EVM0014245	0.0201931
			EVM0003060	EVM0003777	0.0456989				EVM0002670	EVM0017725	0.016268							EVM0009170	EVM0022991	0.0201664
			EVM0003060	EVM0009571	0.0456318				EVM0000677	EVM0017725	0.0162214							EVM0009170	EVM0022694	0.0201503
			EVM0003060	EVM0009110	0.0455541				EVM0004400	EVM0017725	0.0162024							EVM0009170	EVM0010101	0.0200712
			EVM0003060	EVM0014473	0.0455144				EVM0001627	EVM0017725	0.0161949
			EVM0003060	EVM0007730	0.0454498				EVM0003766	EVM0017725	0.016156
			EVM0003060	EVM0015685	0.0452277				EVM0000909	EVM0017725	0.0156411
			EVM0003060	EVM0010471	0.0451867				EVM0003139	EVM0017725	0.0156345
			EVM0003060	EVM0005619	0.045096				EVM0004633	EVM0017725	0.0155234
			EVM0003060	EVM0014190	0.0448972				EVM0001685	EVM0017725	0.0153896
			EVM0003060	EVM0020968	0.0448701				EVM0003861	EVM0017725	0.0153276
			EVM0003060	EVM0008619	0.0448504				EVM0002534	EVM0017725	0.0149435
			EVM0003060	EVM0004207	0.0447769				EVM0001944	EVM0017725	0.0148697
			EVM0003060	EVM0023816	0.0447544				EVM0002299	EVM0017725	0.0148197
			EVM0003060	EVM0016771	0.0447492				EVM0002665	EVM0017725	0.01479
			EVM0003060	EVM0017189	0.044712				EVM0004436	EVM0017725	0.0147593
			EVM0003060	EVM0006356	0.0446749				EVM0000192	EVM0017725	0.0146978
			EVM0003060	EVM0005970	0.0445829				EVM0004160	EVM0017725	0.0146681
			EVM0003060	EVM0004773	0.0445778				EVM0004360	EVM0017725	0.0146367
			EVM0003060	EVM0023743	0.0445192				EVM0002895	EVM0017725	0.0146053
			EVM0003060	EVM0018098	0.0444155				EVM0002638	EVM0017725	0.0146024
			EVM0003060	EVM0011383	0.0443647				EVM0001303	EVM0017725	0.0145727
			EVM0003060	EVM0023468	0.0442794				EVM0004424	EVM0017725	0.0145404
			EVM0003060	EVM0019771	0.0441835				EVM0003010	EVM0017725	0.014525
			EVM0003060	EVM0016909	0.0440778				EVM0001788	EVM0017725	0.014422
			EVM0003060	EVM0004459	0.0440484				EVM0003425	EVM0017725	0.0144008
			EVM0003060	EVM0011542	0.0439076				EVM0002521	EVM0017725	0.0143892
			EVM0003060	EVM0009847	0.043794				EVM0004118	EVM0017725	0.0143506
			EVM0003060	EVM0003227	0.0436656				EVM0001311	EVM0017725	0.0142454
			EVM0003060	EVM0011895	0.0436446				EVM0003588	EVM0017725	0.014101
			EVM0003060	EVM0012079	0.0436412				EVM0002076	EVM0017725	0.0139629
			EVM0003060	EVM0020273	0.0435574				EVM0004314	EVM0017725	0.0139616
			EVM0003060	EVM0016644	0.0434582				EVM0002381	EVM0017725	0.013907
			EVM0003060	EVM0014872	0.0434298				EVM0000429	EVM0017725	0.0136901
			EVM0003060	EVM0010690	0.0433916				EVM0001772	EVM0017725	0.0135701
			EVM0003060	EVM0013804	0.0433128				EVM0000323	EVM0017725	0.0134391
			EVM0003060	EVM0012023	0.04328				EVM0004712	EVM0017725	0.0131386
			EVM0003060	EVM0003184	0.0431354				EVM0004203	EVM0017725	0.0130103
			EVM0003060	EVM0006219	0.0431128				EVM0000397	EVM0017725	0.0129296
			EVM0003060	EVM0011570	0.0430676				EVM0003747	EVM0017725	0.0128056
			EVM0003060	EVM0007827	0.042795				EVM0003520	EVM0017725	0.0128033
			EVM0003060	EVM0011195	0.0426739				EVM0000898	EVM0017725	0.0127691
			EVM0003060	EVM0019114	0.0426708				EVM0001738	EVM0017725	0.0127419
			EVM0003060	EVM0012803	0.0426131				EVM0000195	EVM0017725	0.0126828
			EVM0003060	EVM0008839	0.0425771				EVM0003274	EVM0017725	0.0126365
			EVM0003060	EVM0018777	0.0425197				EVM0004353	EVM0017725	0.0124777
			EVM0003060	EVM0022863	0.0423985				EVM0002852	EVM0017725	0.0124597
			EVM0003060	EVM0022024	0.0423533				EVM0003977	EVM0017725	0.0124482
			EVM0003060	EVM0014008	0.0421726				EVM0004012	EVM0017725	0.0124235
			EVM0003060	EVM0015927	0.0419988				EVM0002309	EVM0017725	0.0123573
			EVM0003060	EVM0005565	0.0419387				EVM0000199	EVM0017725	0.0123346
			EVM0003060	EVM0014530	0.0419283				EVM0003829	EVM0017725	0.0119957
			EVM0003060	EVM0010051	0.041879				EVM0003050	EVM0017725	0.0119397
			EVM0003060	EVM0004878	0.0418754				EVM0002027	EVM0017725	0.01191
			EVM0003060	EVM0012580	0.0418497				EVM0003789	EVM0017725	0.0118391
			EVM0003060	EVM0011308	0.0418388				EVM0002263	EVM0017725	0.011597
			EVM0003060	EVM0014920	0.041833				EVM0004672	EVM0017725	0.0114711
			EVM0003060	EVM0012182	0.0417501				EVM0004628	EVM0017725	0.0114701
			EVM0003060	EVM0019668	0.0416834				EVM0002322	EVM0017725	0.011407
			EVM0003060	EVM0012681	0.0416654				EVM0000454	EVM0017725	0.0110274
			EVM0003060	EVM0016879	0.0416528				EVM0004644	EVM0017725	0.0110218
			EVM0003060	EVM0003573	0.0416005				EVM0002057	EVM0017725	0.0109891
			EVM0003060	EVM0006323	0.0414495				EVM0004860	EVM0017725	0.0107896
			EVM0003060	EVM0022169	0.0414366				EVM0002983	EVM0017725	0.0107783
			EVM0003060	EVM0003937	0.0413765				EVM0004981	EVM0017725	0.0106851
			EVM0003060	EVM0009968	0.0411668				EVM0000017	EVM0017725	0.0106104
			EVM0003060	EVM0015726	0.0411503				EVM0000501	EVM0017725	0.0105882
			EVM0003060	EVM0014169	0.0410692				EVM0001427	EVM0017725	0.0104966
			EVM0003060	EVM0004450	0.0409748				EVM0005129	EVM0017725	0.0104939
			EVM0003060	EVM0007166	0.0409669				EVM0000275	EVM0017725	0.0104809
			EVM0003060	EVM0023032	0.040926				EVM0000735	EVM0017725	0.0103494
			EVM0003060	EVM0007397	0.0409153				EVM0002228	EVM0017725	0.0102839
			EVM0003060	EVM0005424	0.0408826				EVM0003981	EVM0017725	0.0102539
			EVM0003060	EVM0020173	0.0408735				EVM0002599	EVM0017725	0.0100159
			EVM0003060	EVM0011875	0.0408077				EVM0001389	EVM0017725	0.0100105
			EVM0003060	EVM0005399	0.0407897				EVM0004680	EVM0017725	0.0100067
			EVM0003060	EVM0003387	0.0407454
			EVM0003060	EVM0013495	0.0404986
			EVM0003060	EVM0024083	0.0403929
			EVM0003060	EVM0015650	0.0402984
			EVM0003060	EVM0011299	0.040291
			EVM0003060	EVM0010953	0.0402367
			EVM0003060	EVM0011821	0.0402038
			EVM0003060	EVM0013022	0.0401257
			EVM0003060	EVM0008390	0.0400337
			EVM0003060	EVM0015227	0.0400135
			EVM0003060	EVM0015577	0.0399809
			EVM0003060	EVM0010114	0.0398958
			EVM0003060	EVM0005888	0.0397252
			EVM0003060	EVM0006347	0.0396374
			EVM0003060	EVM0005330	0.0395473
			EVM0003060	EVM0009372	0.0395254
			EVM0003060	EVM0012676	0.0395244
			EVM0003060	EVM0012443	0.0395096
			EVM0003060	EVM0016519	0.0394776
			EVM0003060	EVM0016848	0.0394711
			EVM0003060	EVM0006976	0.0394558
			EVM0003060	EVM0008682	0.0394423
			EVM0003060	EVM0012455	0.0393873
			EVM0003060	EVM0008546	0.0393522
			EVM0003060	EVM0009816	0.0393426
			EVM0003060	EVM0004432	0.039197
			EVM0003060	EVM0005289	0.0391172
			EVM0003060	EVM0010106	0.039062
			EVM0003060	EVM0005931	0.0389182
			EVM0003060	EVM0010949	0.0387568
			EVM0003060	EVM0018883	0.0386848
			EVM0003060	EVM0008447	0.0386371
			EVM0003060	EVM0018029	0.0385972
			EVM0003060	EVM0019944	0.0384452
			EVM0003060	EVM0018320	0.038326
			EVM0003060	EVM0021290	0.0383091
			EVM0003060	EVM0009744	0.0382813
			EVM0003060	EVM0021089	0.0381837
			EVM0003060	EVM0016369	0.0381405
			EVM0003060	EVM0018645	0.0380866
			EVM0003060	EVM0011279	0.0378994
			EVM0003060	EVM0007127	0.0377247
			EVM0003060	EVM0022952	0.0376959
			EVM0003060	EVM0011320	0.0376652
			EVM0003060	EVM0018313	0.0376474
			EVM0003060	EVM0011633	0.0376445
			EVM0003060	EVM0021160	0.0376176
			EVM0003060	EVM0020629	0.0375735
			EVM0003060	EVM0011485	0.037555
			EVM0003060	EVM0020761	0.0375541
			EVM0003060	EVM0016710	0.0374173
			EVM0003060	EVM0003170	0.0373791
			EVM0003060	EVM0017338	0.0373685
			EVM0003060	EVM0014288	0.0371746
			EVM0003060	EVM0010116	0.0371356
			EVM0003060	EVM0014596	0.0370089
			EVM0003060	EVM0006473	0.0368735
			EVM0003060	EVM0003640	0.03686
			EVM0003060	EVM0016037	0.0368584
			EVM0003060	EVM0011667	0.0368196
			EVM0003060	EVM0020917	0.0366206
			EVM0003060	EVM0016899	0.0366076
			EVM0003060	EVM0008046	0.0365739
			EVM0003060	EVM0011686	0.0365475
			EVM0003060	EVM0019506	0.0364868
			EVM0003060	EVM0016627	0.0362432
			EVM0003060	EVM0022291	0.0361685
			EVM0003060	EVM0014698	0.0360308
			EVM0003060	EVM0015023	0.0360029
			EVM0003060	EVM0016485	0.0359777
			EVM0003060	EVM0020794	0.0358952
			EVM0003060	EVM0018137	0.0358945
			EVM0003060	EVM0013534	0.0358562
			EVM0003060	EVM0013762	0.0357212
			EVM0003060	EVM0004102	0.0356957
			EVM0003060	EVM0016978	0.0356785
			EVM0003060	EVM0022148	0.0355835
			EVM0003060	EVM0019310	0.0354789
			EVM0003060	EVM0022700	0.0354639
			EVM0003060	EVM0011007	0.0354471
			EVM0003060	EVM0021642	0.0353766
			EVM0003060	EVM0019609	0.0353741
			EVM0003060	EVM0013583	0.0353141
			EVM0003060	EVM0021704	0.0351044
			EVM0003060	EVM0017403	0.035094
			EVM0003060	EVM0016144	0.0350712
			EVM0003060	EVM0010738	0.0350273
			EVM0003060	EVM0013788	0.0349927
			EVM0003060	EVM0019291	0.0349418
			EVM0003060	EVM0021619	0.0348804
			EVM0003060	EVM0011707	0.0348716
			EVM0003060	EVM0020842	0.034867
			EVM0003060	EVM0007520	0.0347654
			EVM0003060	EVM0012252	0.0346329
			EVM0003060	EVM0016514	0.0345861
			EVM0003060	EVM0017566	0.0345756
			EVM0003060	EVM0016685	0.0345575
			EVM0003060	EVM0023958	0.0344353
			EVM0003060	EVM0022839	0.0342433
			EVM0003060	EVM0022054	0.0342195
			EVM0003060	EVM0011121	0.0342075
			EVM0003060	EVM0023994	0.0341915
			EVM0003060	EVM0022473	0.0341485
			EVM0003060	EVM0004728	0.0340812
			EVM0003060	EVM0010271	0.0340217
			EVM0003060	EVM0018346	0.0339987
			EVM0003060	EVM0018431	0.0339897
			EVM0003060	EVM0011074	0.0339725
			EVM0003060	EVM0021297	0.0339502
			EVM0003060	EVM0021974	0.0339258
			EVM0003060	EVM0010611	0.0339066
			EVM0003060	EVM0010090	0.0337944
			EVM0003060	EVM0010869	0.0337684
			EVM0003060	EVM0003189	0.0337533
			EVM0003060	EVM0020073	0.0337272
			EVM0003060	EVM0022033	0.0337243
			EVM0003060	EVM0009508	0.0336809
			EVM0003060	EVM0023608	0.0336195
			EVM0003060	EVM0003516	0.0335535
			EVM0003060	EVM0020032	0.0334331
			EVM0003060	EVM0007442	0.0333546
			EVM0003060	EVM0016353	0.0333528
			EVM0003060	EVM0009115	0.033222
			EVM0003060	EVM0014583	0.0330859
			EVM0003060	EVM0003279	0.032953
			EVM0003060	EVM0004917	0.0329347
			EVM0003060	EVM0005369	0.0328271
			EVM0003060	EVM0023181	0.0328003
			EVM0003060	EVM0008347	0.0327528
			EVM0003060	EVM0021820	0.032717
			EVM0003060	EVM0015492	0.0325671
			EVM0003060	EVM0015732	0.0325626
			EVM0003060	EVM0006683	0.0324559
			EVM0003060	EVM0003545	0.0324291
			EVM0003060	EVM0022182	0.0324063
			EVM0003060	EVM0006001	0.0323951
			EVM0003060	EVM0005872	0.0323913
			EVM0003060	EVM0008940	0.0323436
			EVM0003060	EVM0014456	0.0322498
			EVM0003060	EVM0021682	0.0322438
			EVM0003060	EVM0010092	0.0321912
			EVM0003060	EVM0015850	0.0319775
			EVM0003060	EVM0004208	0.0319309
			EVM0003060	EVM0004416	0.0318842
			EVM0003060	EVM0010996	0.0318184
			EVM0003060	EVM0009369	0.0317928
			EVM0003060	EVM0006079	0.0317626
			EVM0003060	EVM0021767	0.0317605
			EVM0003060	EVM0015269	0.0315607
			EVM0003060	EVM0015706	0.0315479
			EVM0003060	EVM0009133	0.0314957
			EVM0003060	EVM0008538	0.031295
			EVM0003060	EVM0011757	0.0312118
			EVM0003060	EVM0013155	0.0311984
			EVM0003060	EVM0018626	0.0310565
			EVM0003060	EVM0004603	0.03104
			EVM0003060	EVM0023964	0.0308744
			EVM0003060	EVM0016742	0.0308424
			EVM0003060	EVM0024106	0.0308271
			EVM0003060	EVM0008486	0.0307297
			EVM0003060	EVM0012761	0.0306497
			EVM0003060	EVM0004360	0.0306486
			EVM0003060	EVM0017913	0.030571
			EVM0003060	EVM0019816	0.0305555
			EVM0003060	EVM0020419	0.0305195
			EVM0003060	EVM0024071	0.0304041
			EVM0003060	EVM0007858	0.0303997
			EVM0003060	EVM0008830	0.0302949
			EVM0003060	EVM0016148	0.0301304
			EVM0003060	EVM0011567	0.0301215
			EVM0003060	EVM0005185	0.0300714
			EVM0003060	EVM0006185	0.030003
			EVM0003060	EVM0005487	0.0299973
			EVM0003060	EVM0004653	0.0299342
			EVM0003060	EVM0012866	0.0299095
			EVM0003060	EVM0014353	0.0298989
			EVM0003060	EVM0011489	0.0298877
			EVM0003060	EVM0015166	0.0297267
			EVM0003060	EVM0010818	0.0297235
			EVM0003060	EVM0019429	0.0296638
			EVM0003060	EVM0007840	0.0296593
			EVM0003060	EVM0015430	0.0296434
			EVM0003060	EVM0012956	0.0296327
			EVM0003060	EVM0015005	0.0295852
			EVM0003060	EVM0008957	0.0295416
			EVM0003060	EVM0009280	0.0295134
			EVM0003060	EVM0004785	0.0293913
			EVM0003060	EVM0010174	0.02933
			EVM0003060	EVM0022285	0.0293188
			EVM0003060	EVM0019673	0.029274
			EVM0003060	EVM0005533	0.0291888
			EVM0003060	EVM0023008	0.0291883
			EVM0003060	EVM0014495	0.0291447
			EVM0003060	EVM0019494	0.0291204
			EVM0003060	EVM0011282	0.0290904
			EVM0003060	EVM0020075	0.0290812
			EVM0003060	EVM0011061	0.0290387
			EVM0003060	EVM0019783	0.0288018
			EVM0003060	EVM0014967	0.0287867
			EVM0003060	EVM0013439	0.02878
			EVM0003060	EVM0014713	0.0287524
			EVM0003060	EVM0009177	0.0287356
			EVM0003060	EVM0012398	0.0286041
			EVM0003060	EVM0008107	0.0285781
			EVM0003060	EVM0009397	0.0285716
			EVM0003060	EVM0006500	0.0285397
			EVM0003060	EVM0003750	0.0284674
			EVM0003060	EVM0012701	0.0284438
			EVM0003060	EVM0006490	0.0284175
			EVM0003060	EVM0005125	0.0284072
			EVM0003060	EVM0007654	0.0284027
			EVM0003060	EVM0009905	0.0283356
			EVM0003060	EVM0009226	0.0283282
			EVM0003060	EVM0014384	0.0281968
			EVM0003060	EVM0012843	0.0281648
			EVM0003060	EVM0005727	0.0280433
			EVM0003060	EVM0009706	0.0280319
			EVM0003060	EVM0021401	0.0280105
			EVM0003060	EVM0006585	0.0279803
			EVM0003060	EVM0006331	0.027893
			EVM0003060	EVM0013812	0.0278376
			EVM0003060	EVM0018805	0.0278019
			EVM0003060	EVM0007278	0.027595
			EVM0003060	EVM0013639	0.027587
			EVM0003060	EVM0006027	0.0275239
			EVM0003060	EVM0008898	0.0275026
			EVM0003060	EVM0010414	0.0274884
			EVM0003060	EVM0018738	0.0273751
			EVM0003060	EVM0020289	0.0273373
			EVM0003060	EVM0017756	0.0273322
			EVM0003060	EVM0017354	0.0273145
			EVM0003060	EVM0009936	0.027313
			EVM0003060	EVM0019423	0.0273032
			EVM0003060	EVM0009135	0.0272766
			EVM0003060	EVM0003262	0.0272387
			EVM0003060	EVM0019289	0.0272379
			EVM0003060	EVM0008466	0.0271885
			EVM0003060	EVM0006929	0.0271767
			EVM0003060	EVM0022628	0.027044
			EVM0003060	EVM0004054	0.0270269
			EVM0003060	EVM0020340	0.026981
			EVM0003060	EVM0003829	0.0269316
			EVM0003060	EVM0022616	0.0269074
			EVM0003060	EVM0005751	0.0268121
			EVM0003060	EVM0011580	0.026756
			EVM0003060	EVM0021710	0.0266941
			EVM0003060	EVM0012059	0.0266064
			EVM0003060	EVM0017402	0.0265842
			EVM0003060	EVM0013280	0.0265765
			EVM0003060	EVM0005290	0.0264036
			EVM0003060	EVM0013543	0.026353
			EVM0003060	EVM0012547	0.026333
			EVM0003060	EVM0020864	0.0263082
			EVM0003060	EVM0023938	0.0262517
			EVM0003060	EVM0017299	0.0261585
			EVM0003060	EVM0011621	0.0260963
			EVM0003060	EVM0017066	0.0260635
			EVM0003060	EVM0009558	0.0258728
			EVM0003060	EVM0023221	0.0258704
			EVM0003060	EVM0022463	0.0258092
			EVM0003060	EVM0011370	0.0257759
			EVM0003060	EVM0015348	0.025762
			EVM0003060	EVM0005790	0.0257107
			EVM0003060	EVM0019138	0.0256718
			EVM0003060	EVM0008729	0.0256632
			EVM0003060	EVM0018119	0.0256518
			EVM0003060	EVM0008357	0.0256413
			EVM0003060	EVM0005783	0.025614
			EVM0003060	EVM0010601	0.0256096
			EVM0003060	EVM0008074	0.025596
			EVM0003060	EVM0023105	0.0255335
			EVM0003060	EVM0010859	0.0255271
			EVM0003060	EVM0012982	0.0254894
			EVM0003060	EVM0014119	0.0254581
			EVM0003060	EVM0012655	0.0254157
			EVM0003060	EVM0023312	0.0254044
			EVM0003060	EVM0009228	0.0253614
			EVM0003060	EVM0012004	0.0253425
			EVM0003060	EVM0017506	0.0253408
			EVM0003060	EVM0004001	0.0253372
			EVM0003060	EVM0018186	0.0253135
			EVM0003060	EVM0010834	0.0253113
			EVM0003060	EVM0003789	0.0252673
			EVM0003060	EVM0005236	0.0252539
			EVM0003060	EVM0018025	0.0252239
			EVM0003060	EVM0023897	0.0252226
			EVM0003060	EVM0017392	0.0252171
			EVM0003060	EVM0006113	0.0251815
			EVM0003060	EVM0013286	0.025164
			EVM0003060	EVM0012289	0.0251443
			EVM0003060	EVM0014878	0.0250612
			EVM0003060	EVM0010954	0.0249591
			EVM0003060	EVM0018535	0.0249522
			EVM0003060	EVM0005015	0.0249267
			EVM0003060	EVM0017214	0.0249101
			EVM0003060	EVM0007485	0.0248561
			EVM0003060	EVM0023738	0.0248518
			EVM0003060	EVM0015173	0.0248312
			EVM0003060	EVM0018013	0.0248268
			EVM0003060	EVM0020815	0.0247462
			EVM0003060	EVM0010511	0.0246236
			EVM0003060	EVM0014108	0.0245948
			EVM0003060	EVM0022874	0.0245748
			EVM0003060	EVM0005599	0.0244836
			EVM0003060	EVM0007339	0.0244494
			EVM0003060	EVM0018560	0.0244337
			EVM0003060	EVM0015690	0.0242861
			EVM0003060	EVM0021693	0.0242853
			EVM0003060	EVM0003826	0.0242314
			EVM0003060	EVM0007042	0.0241963
			EVM0003060	EVM0012796	0.0241425
			EVM0003060	EVM0019585	0.0240927
			EVM0003060	EVM0015099	0.0240717
			EVM0003060	EVM0019401	0.024031
			EVM0003060	EVM0019937	0.0240004
			EVM0003060	EVM0023149	0.0239953
			EVM0003060	EVM0004736	0.0239801
			EVM0003060	EVM0021890	0.0239747
			EVM0003060	EVM0020816	0.0239633
			EVM0003060	EVM0016559	0.0239443
			EVM0003060	EVM0022649	0.0238532
			EVM0003060	EVM0023339	0.0238453
			EVM0003060	EVM0010003	0.0238389
			EVM0003060	EVM0022097	0.0236762
			EVM0003060	EVM0013580	0.0236163
			EVM0003060	EVM0019306	0.0236136
			EVM0003060	EVM0015486	0.0234624
			EVM0003060	EVM0022376	0.0234405
			EVM0003060	EVM0021347	0.0234086
			EVM0003060	EVM0009289	0.0232877
			EVM0003060	EVM0009411	0.023263
			EVM0003060	EVM0010623	0.0232422
			EVM0003060	EVM0011971	0.0232347
			EVM0003060	EVM0003345	0.0232094
			EVM0003060	EVM0014971	0.0232059
			EVM0003060	EVM0022854	0.0231849
			EVM0003060	EVM0012458	0.023181
			EVM0003060	EVM0005851	0.0231679
			EVM0003060	EVM0022727	0.0230731
			EVM0003060	EVM0007246	0.0230522
			EVM0003060	EVM0004281	0.0230366
			EVM0003060	EVM0008700	0.0229402
			EVM0003060	EVM0008368	0.0229386
			EVM0003060	EVM0005703	0.0229383
			EVM0003060	EVM0003125	0.0227543
			EVM0003060	EVM0018909	0.0227196
			EVM0003060	EVM0017839	0.022589
			EVM0003060	EVM0006264	0.0225726
			EVM0003060	EVM0024057	0.0225659
			EVM0003060	EVM0004267	0.0225458
			EVM0003060	EVM0015403	0.0224604
			EVM0003060	EVM0006586	0.0224193
			EVM0003060	EVM0018704	0.0223773
			EVM0003060	EVM0012484	0.02236
			EVM0003060	EVM0011434	0.0223391
			EVM0003060	EVM0013869	0.0223304
			EVM0003060	EVM0019407	0.0222982
			EVM0003060	EVM0012646	0.0222694
			EVM0003060	EVM0012052	0.0222527
			EVM0003060	EVM0022235	0.0222469
			EVM0003060	EVM0007513	0.0222084
			EVM0003060	EVM0007032	0.0222075
			EVM0003060	EVM0009434	0.0221523
			EVM0003060	EVM0016009	0.022042
			EVM0003060	EVM0014837	0.0220264
			EVM0003060	EVM0004658	0.0219983
			EVM0003060	EVM0014064	0.0219657
			EVM0003060	EVM0007517	0.021963
			EVM0003060	EVM0021144	0.0219425
			EVM0003060	EVM0012372	0.0219424
			EVM0003060	EVM0008287	0.0218073
			EVM0003060	EVM0010646	0.0217946
			EVM0003060	EVM0022441	0.0217421
			EVM0003060	EVM0007823	0.0217269
			EVM0003060	EVM0011890	0.0216268
			EVM0003060	EVM0015178	0.0215909
			EVM0003060	EVM0021000	0.0215345
			EVM0003060	EVM0016849	0.0214654
			EVM0003060	EVM0013224	0.0214513
			EVM0003060	EVM0018172	0.0214346
			EVM0003060	EVM0019479	0.0213181
			EVM0003060	EVM0022382	0.0212887
			EVM0003060	EVM0023222	0.0212207
			EVM0003060	EVM0005560	0.0212015
			EVM0003060	EVM0020800	0.0211751
			EVM0003060	EVM0006384	0.0210111
			EVM0003060	EVM0008245	0.020997
			EVM0003060	EVM0004160	0.0209575
			EVM0003060	EVM0014996	0.0209498
			EVM0003060	EVM0004455	0.0209377
			EVM0003060	EVM0003169	0.0209364
			EVM0003060	EVM0017885	0.0208871
			EVM0003060	EVM0009025	0.0208776
			EVM0003060	EVM0009243	0.0207985
			EVM0003060	EVM0015937	0.0206943
			EVM0003060	EVM0023884	0.020688
			EVM0003060	EVM0010472	0.0206335
			EVM0003060	EVM0003603	0.020585
			EVM0003060	EVM0017725	0.0205313
			EVM0003060	EVM0018091	0.0205157
			EVM0003060	EVM0018533	0.0204395
			EVM0003060	EVM0013209	0.0204281
			EVM0003060	EVM0009804	0.0203761
			EVM0003060	EVM0005072	0.0203328
			EVM0003060	EVM0011902	0.0203309
			EVM0003060	EVM0010186	0.0202977
			EVM0003060	EVM0015436	0.0202783
			EVM0003060	EVM0023053	0.0202579
			EVM0003060	EVM0007528	0.0202568
			EVM0003060	EVM0008016	0.0202494
			EVM0003060	EVM0010030	0.0202256
			EVM0003060	EVM0015758	0.0202078
			EVM0003060	EVM0007741	0.0201513
			EVM0003060	EVM0012739	0.0201033

## Sheet: Table S6
Table S6. The expression level of SOD gene in the resistant and susceptible rinds of A. trifoliata
Gene name	resistant rinds (mixed pool) 57 (day)	resistant rinds (mixed pool) (90day)	resistant rinds (mixed pool) 118 (day)	susceptible rinds (mixed pool) 57 (day)	susceptible rinds (mixed pool) (90day)	susceptible rinds (mixed pool) 118(day)
AktCSD1	46.2463	25.0859	21.4253	69.7621	66.0283	37.9458
AktCSD2	14.1065	17.7744	24.8102	18.1685	17.5351	17.2746
AktCSD3	506.199	329.796	372.865	475.38	348.716	363.456
AktCSD4	47.8026	30.2275	47.642	40.6112	29.9449	31.4148
AktCSD5	16.684	15.6485	23.9021	20.8276	18.9258	25.3142
AktCSD6	39.2025	23.6327	60.5292	63.2157	27.7108	41.1721
AktCSD7	0	0	0	0	0	0
AktFSD1	5.15489	5.6594	12.7529	5.57352	5.09694	7.09162
AktFSD2	3.73069	3.99785	10.8208	6.0561	6.21972	8.0801
AktMSD1	6.66813	14.025	22.8354	1.12939	0.560869	0.340705
AktMSD2	2.13196	4.07436	6.71172	0.881678	1.04821	2.67776
AktMSD3	0.607916	1.38575	2.24626	0.213549	0.191598	0
AktMSD4	183.757	174.258	121.787	194.064	204.699	147.573
