# Supplementary figures and images for: Genome-Wide Identification of Superoxide Dismutase and Expression in Response to Fruit Development and Biological Stress in Akebia trifoliata: A Bioinformatics Study
Source: MDPI journal article supplement (doi:10.3390/antiox12030726), 2023-03-15

Supplementary figure

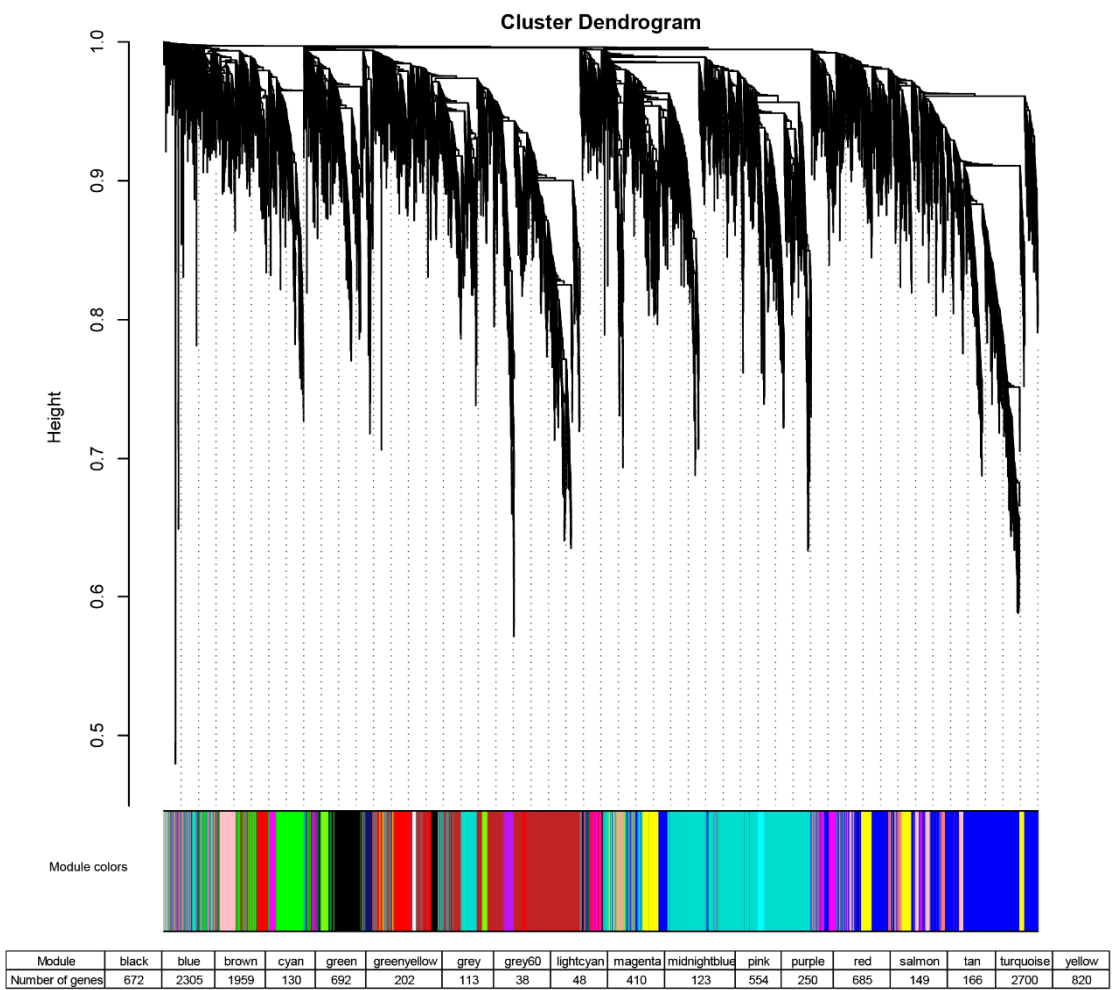

Supplementary Figure S1. WGCNA of fruit developmental transcriptome.

Supplement: s1 [file s1]
